# Supplementary material for: Codon choice directs constitutive mRNA levels in trypanosomes
Source: eLife. 2018 Mar 15;7:e32467. doi: 10.7554/eLife.32467 (PMC5896880; doi:10.7554/eLife.32467)
Supplement: Supplementary file 4. — The values for three biological replicates for two developmental forms, PCF procyclic forms and BSF bloodstream forms, are shown. 'P-adj' is the Benjamini-Hochberg adjusted P-value for the BSF measurements being the same as the PCF measurement. The data was taken from EBI Array Express E-MTAB-3335 (Kelly et al., 2017). [file elife-32467-supp4.xlsx]

## Sheet: Sheet1
Accession	PCF1 TPM	PCF2 TPM	PCF3 TPM	BSF1 TPM	BSF2 TPM	BSF3 TPM		geCAI		Developmental expression: log2(B/P)		P-adj
	Read Counts
	13382455	13444616	12831821	13365473	13356439	13119452
Tb927.1.1000	48.14	42.02	48.28	78.02	67.95	71.36		0.362		0.650626		0.51794
Tb927.1.1010	15.56	19.42	15.79	33.55	34.06	32.13		0.324		0.974196		0.0014924
Tb927.1.1020	22.23	20.52	20.21	52.72	51.97	51.86		0.34		1.31412		1.20785e-09
Tb927.1.1030	64.89	68.7	63.93	94.68	79.89	82.66		0.362		0.38106		0.256981
Tb927.1.1050	22.38	23.57	19.68	40.62	43.7	48.07		0.346		1.01237		6.24151e-05
Tb927.1.1060	17.74	19.18	16.22	33.8	30.06	37.56		0.334		0.932472		0.0334572
Tb927.1.1100	24.86	28.05	24.69	39.53	41.82	47.95		0.357		0.736594		0.100214
Tb927.1.1120	41.4	47.12	39.14	49.85	43	45.73		0.374		0.118413		0.00392158
Tb927.1.1130	29	27.69	26.06	34.3	34.46	37.27		0.323		0.357641		0.265779
Tb927.1.1140	36.19	38.1	32.27	54.01	60.18	61.51		0.359		0.721448		0.187954
Tb927.1.1150	36.35	40.29	37.12	36.22	38.6	38.66		0.337		-0.00355531		0.000104469
Tb927.1.1160	33.01	34.22	30.23	43.5	45.83	43.19		0.337		0.443328		0.644109
Tb927.1.1200	51.69	59.73	49.31	52.59	47.07	52.5		0.412		-0.0790501		3.24994e-07
Tb927.1.1210	79.97	79.99	70.42	73.57	68.75	70.76		0.408		-0.11262		1.45662e-06
Tb927.1.1220	76.95	79.62	63.6	79.22	68.51	69.95		0.383		-0.016409		7.48976e-05
Tb927.1.1230	16.79	16.83	16.39	24.05	25.38	25.27		0.329		0.578892		0.802861
Tb927.1.1240	121.11	136.76	124.46	61.89	84.13	91.4		0.36		-0.687377		3.74146e-27
Tb927.1.1270	32.45	31.75	30.63	43.72	55.35	56.3		0.333		0.712293		0.249609
Tb927.1.1300	29.98	24.13	21.31	46.03	40.69	42.1		0.363		0.772338		0.174326
Tb927.1.1310	34.55	36.16	29.95	45.24	45.22	45.11		0.35		0.429547		0.609879
Tb927.1.1330	43.28	40.75	37.42	43.79	45.71	41.01		0.36		0.103798		0.00258372
Tb927.1.1340	27.62	28.52	21.32	29.99	36.69	38.58		0.337		0.442434		0.632869
Tb927.1.1370	39.29	41.28	35.23	28.98	27.36	31.5		0.341		-0.398685		4.23228e-13
Tb927.1.1390	41.44	48.67	39.41	45.5	31.33	35.36		0.377		-0.207231		3.69413e-06
Tb927.1.1400	36.1	41.29	29.09	30.29	31.52	29.47		0.344		-0.222212		6.9414e-05
Tb927.1.1420	75.73	85.72	68.21	50.45	62.47	65.91		0.369		-0.360911		7.71272e-16
Tb927.1.1530	24.48	26.99	23.61	28.96	38.77	42.32		0.346		0.551659		0.94594
Tb927.1.1540	35.43	36.11	34.76	40.58	37.89	42.77		0.344		0.189724		0.00891276
Tb927.1.1550	31.84	37.91	30.02	60.76	62.93	68		0.334		0.942097		0.000582742
Tb927.1.1560	31.42	32.19	25.32	58.12	58.03	63.44		0.391		1.01396		2.05879e-05
Tb927.1.1580	70.12	77.98	64.06	28.86	31.82	37.44		0.351		-1.11253		2.41707e-29
Tb927.1.1600	25.42	27.3	24.54	24.66	32.47	30.33		0.348		0.178902		0.0032996
Tb927.1.1610	32.97	36.46	30.62	65.54	62.81	63.54		0.375		0.939558		0.0014894
Tb927.1.1620	40.1	44.93	35.27	34.9	40.43	39.71		0.342		-0.0645011		1.05013e-06
Tb927.1.1630	35.85	33.54	26.65	46	46.66	47.15		0.357		0.54176		0.940596
Tb927.1.1640	38.67	40.91	30.56	60.96	56.07	63.36		0.336		0.711781		0.219265
Tb927.1.1660	29.27	23.01	24.33	55.48	44.37	49.2		0.311		0.960192		0.0202554
Tb927.1.1670	37.75	40.19	35.24	65.16	65.87	70.56		0.328		0.832805		0.00723924
Tb927.1.1680	42.38	47.1	37.99	44.27	38.47	44.74		0.354		0.000113175		0.000464934
Tb927.1.1690	25.65	26.03	23.67	38.29	35.79	38.31		0.328		0.576834		0.76781
Tb927.1.1700	45.42	47.9	40.05	31.86	29.19	31.9		0.397		-0.520907		8.48695e-15
Tb927.1.1710	37.69	44.63	35.51	63.97	77.27	81.19		0.349		0.916644		0.000331879
Tb927.1.1720	35.29	39.21	30.33	63.58	64.82	62.15		0.372		0.862118		0.016726
Tb927.1.1730	57.85	70.29	54.25	85.6	91.36	94.3		0.361		0.57265		0.73526
Tb927.1.1750	26.63	28.32	21.26	26.52	41.72	41.69		0.342		0.528533		1
Tb927.1.1770	115.31	123.57	116.12	83.71	78.7	107.85		0.382		-0.393471		1.67315e-05
Tb927.1.1790	48.63	45.4	45.08	112.65	107.17	113.13		0.383		1.25908		1.44144e-07
Tb927.1.1820	33.58	36.33	30.57	78.55	84.93	92.02		0.357		1.34641		2.07425e-10
Tb927.1.1840	31.27	39.37	30.47	40.01	60.5	63.72		0.377		0.699792		0.489366
Tb927.1.1880	32.11	34.7	27.5	66.32	77.2	81.8		0.335		1.25649		2.02916e-11
Tb927.1.1890	30.95	35.09	29.08	45.86	53.13	57.11		0.364		0.71465		0.131263
Tb927.1.1910	18.72	20.66	18.02	36.48	42.62	45.13		0.326		1.11389		7.87249e-07
Tb927.1.1930	30.89	38.04	35.06	37.62	79.39	81.85		0.36		0.935308		0.344455
Tb927.1.1960	100.93	117.32	93.71	114.08	140.87	147.5		0.394		0.367448		0.194384
Tb927.1.1980	56.7	65.34	55.59	92.61	95.59	97.4		0.372		0.685121		0.248094
Tb927.1.1990	36.31	30.65	26.05	55.4	46.57	45.91		0.391		0.668969		0.49123
Tb927.1.2150	18.32	17.91	16.7	19.11	18.47	20.93		0.416		0.144598		0.0116533
Tb927.1.2160	166.63	180.75	153.52	75.14	57.08	65.63		0.371		-1.34012		5.62013e-41
Tb927.1.2190	39.72	43.99	36.98	39.2	64.56	70.93		0.322		0.533491		1
Tb927.1.2210	177.59	184.12	140.36	127.22	132.79	134.51		0.409		-0.34779		1.81529e-14
Tb927.1.2320	25.02	26.05	23.44	50.3	42.61	49.55		0.385		0.935051		0.00384624
Tb927.1.2570	84.94	92.89	76.57	147.52	160.26	162.7		0.368		0.887035		0.000760818
Tb927.1.2580	67.37	83.44	67.74	92.18	88.04	99.57		0.351		0.356381		0.21476
Tb927.1.2640	56.79	58.06	56.39	86.91	78.73	83.6		0.357		0.541516		0.959573
Tb927.1.2670	138.56	146.93	115.97	110.34	128.56	133.54		0.361		-0.108248		5.93347e-09
Tb927.1.2700	53.1	62.5	52.21	61.69	59.2	66.61		0.319		0.160062		0.00522351
Tb927.1.2710	29.61	30.29	25.51	16.25	28.11	34.88		0.347		-0.108176		0.00620251
Tb927.1.2730	60.33	77.42	60.5	73.72	72.04	78.6		0.335		0.178495		0.0133678
Tb927.1.2740	24.58	25.74	23.8	49.83	49.6	53.23		0.322		1.04239		9.52981e-05
Tb927.1.2750	235.31	271.91	187.92	209.17	202.06	237.36		0.407		-0.0999968		2.58831e-07
Tb927.1.2770	27.3	27.79	24.66	44.36	46.24	41.16		0.37		0.724356		0.197814
Tb927.1.2970	52.08	55.52	41.13	91.37	80.77	82.25		0.333		0.774346		0.0962456
Tb927.1.2980	25.83	28.36	26.34	41.73	43.35	44.69		0.322		0.688359		0.207246
Tb927.1.2990	40.73	45.54	35.79	66.7	77.12	77.88		0.391		0.861018		0.0037488
Tb927.1.3000	39.11	43.18	35.58	71.65	70.5	74.46		0.357		0.877903		0.00614021
Tb927.1.3010	28.38	30.9	25.06	35.04	28.61	33.18		0.338		0.199237		0.057056
Tb927.1.3030	42.31	48.24	32.99	94.65	100.07	101.01		0.411		1.2593		2.53132e-09
Tb927.1.3040	27.75	32.33	21.85	42.72	42.7	48.98		0.344		0.714069		0.256384
Tb927.1.3050	40.31	45.34	35.88	56.72	58.56	67.37		0.391		0.587769		0.682493
Tb927.1.3070	149.49	187.6	141.74	124.6	149.23	161.95		0.405		-0.135914		4.89053e-09
Tb927.1.3110	59.99	66.1	49.59	142.43	130.72	134.96		0.419		1.21601		2.76235e-09
Tb927.1.3120	18.03	19.92	18.6	41.25	41.99	43.69		0.345		1.16643		1.35879e-07
Tb927.1.3150	47.81	47.86	42.29	59.78	57.73	62.38		0.367		0.382865		0.337212
Tb927.1.3170	71.8	76.89	64.14	79.3	83.61	90.15		0.408		0.249778		0.0333132
Tb927.1.3200	113.56	122.17	101.52	149.03	163.31	175.88		0.437		0.533713		0.962713
Tb927.1.3220	30	34	27.44	53.94	52.17	54.92		0.343		0.816432		0.0227509
Tb927.1.3230	17.47	19.7	16.7	36.23	40.54	43.34		0.337		1.1568		2.15119e-06
Tb927.1.3250	36.12	42.88	33.69	54.43	70.43	72.58		0.38		0.809055		0.0392351
Tb927.1.3260	36.55	39.58	36.21	52.23	64.79	69.34		0.334		0.730221		0.104353
Tb927.1.3270	26.1	31.47	24.63	41.85	51.14	53.46		0.362		0.833198		0.0144949
Tb927.1.3280	27.27	27	25.94	68.67	65	68.35		0.381		1.33264		2.96394e-08
Tb927.1.3290	28.95	32.6	27.41	53.51	59.29	67.42		0.345		1.01853		2.90994e-05
Tb927.1.3300	32.64	34.34	27.04	56.45	58.7	61.06		0.352		0.906256		0.000811402
Tb927.1.3310	167.06	177.7	153.43	101.27	86.45	90.33		0.342		-0.841352		3.03713e-34
Tb927.1.3390	97.31	114.04	94.03	147.44	122.34	112.52		0.368		0.3241		0.275062
Tb927.1.3400	45.09	53.17	44.1	46.73	44.74	43.17		0.34		-0.0804368		1.3732e-05
Tb927.1.3410	26.4	26.61	26.87	42.23	37.06	38.95		0.346		0.565812		0.843629
Tb927.1.3450	47.95	51.95	47.03	63.06	73.84	76.07		0.337		0.535521		1
Tb927.1.3800	39.25	41.9	36.83	26.49	23.34	21.26		0.352		-0.730824		1.60049e-09
Tb927.1.3810	54.95	63.5	52.26	44.24	25.99	24.83		0.375		-0.844637		2.81879e-11
Tb927.1.3820	116.06	110.67	116.98	130.21	85.72	95.23		0.444		-0.143535		0.00446687
Tb927.1.3830	92.62	88.67	79.27	163.66	163.61	162.1		0.372		0.90931		0.000511887
Tb927.1.3840	16.91	18.14	16.05	18.28	15.21	17.52		0.337		-0.00254319		0.000597638
Tb927.1.3860	21.53	25.43	20.03	19.44	19.94	21.48		0.348		-0.138451		9.53543e-08
Tb927.1.3880	22.78	23.14	21.78	23.27	29.29	30.01		0.348		0.286462		0.0441867
Tb927.1.3910	35.36	37.98	32.31	28.32	33.58	36.2		0.338		-0.106968		2.18578e-07
Tb927.1.3940	33.71	36.79	30.62	34.07	39.36	43.79		0.348		0.21315		0.0106803
Tb927.1.3950	74.33	85.86	66.59	112.05	133.63	149.08		0.413		0.799682		0.0211581
Tb927.1.4010	30.23	35.54	25.8	11.93	39.92	45.97		0.35		0.0952544		0.352061
Tb927.1.4040	56.29	68.76	50.04	46.29	59.74	67.3		0.358		-0.0145753		0.000176846
Tb927.1.4100	383.69	434.64	373.94	62.05	70.75	76.56		0.399		-2.50965		1.54296e-162
Tb927.1.4140	26.38	27.33	23.4	27.33	28.09	27.68		0.356		0.107931		0.0187384
Tb927.1.4160	39.95	49.93	39.34	64.18	64.16	53.89		0.385		0.495931		0.966264
Tb927.1.4180	39.69	45.36	35.01	42.82	49.37	53.19		0.369		0.276073		0.051566
Tb927.1.4220	32.82	38.01	32.4	42.69	38.96	43.03		0.312		0.272368		0.0975654
Tb927.1.4230	95.93	115.56	93.14	89.49	109.06	118.18		0.396		0.0561955		8.63185e-05
Tb927.1.4250	29.55	31.25	28.41	22.49	24.35	29.73		0.327		-0.220426		8.57138e-09
Tb927.1.4280	26.42	30.46	25.55	15.14	28.98	32.53		0.325		-0.104884		0.00862448
Tb927.1.4300	17.98	19.75	16.62	16.78	31.97	35.72		0.341		0.636159		0.805321
Tb927.1.4310	145.39	186.31	138.57	100.75	204.15	213.67		0.366		0.141049		0.208634
Tb927.1.4340	36.43	38.26	32.2	53.52	55.73	58.11		0.329		0.646828		0.389093
Tb927.1.4370	21.04	22.83	19.22	67.78	65.87	72.38		0.326		1.70737		6.5993e-24
Tb927.1.4380	35.04	39.92	33.3	70.67	69.09	78.63		0.323		1.01241		8.94635e-05
Tb927.1.4400	36.31	37.52	30.75	55.67	56.87	58.65		0.334		0.710991		0.271572
Tb927.1.4410	61.79	70.31	55.82	78.03	86.42	92.79		0.391		0.452996		0.610425
Tb927.1.4420	57.22	60.81	51.66	21.39	30.02	29.65		0.34		-1.06584		3.79815e-43
Tb927.1.4450	20.42	20.97	18.24	30.36	35.14	38.71		0.339		0.805383		0.0333424
Tb927.1.4470	30.79	30.26	24.02	52.69	54.34	56.53		0.337		0.943098		0.00157463
Tb927.1.4480	31.58	37.46	31.65	42.57	47.34	50.5		0.35		0.479725		0.741852
Tb927.1.4500	45.65	47.36	41	104.22	87.38	86.21		0.356		1.05176		0.000318174
Tb927.1.4520	18.29	22.68	19.9	54.91	56.53	63.97		0.358		1.52693		1.01791e-16
Tb927.1.4680	58.33	76.78	56.4	52.57	57.02	59.18		0.344		-0.182361		5.28015e-08
Tb927.1.4690	138.76	150.42	124.48	85.69	73.93	92.57		0.382		-0.713934		1.16813e-29
Tb927.1.4700	57.25	59.69	53.89	38.44	42.5	40.27		0.344		-0.495053		9.06264e-13
Tb927.1.4710	26.89	27.97	15.12	63.66	62.84	80.24		0.368		1.5628		1.30301e-08
Tb927.1.4720	31.14	33.44	26.22	44.52	42.1	49.82		0.319		0.587502		0.702595
Tb927.1.4730	69.56	67.34	52.08	57.6	44.39	58.11		0.362		-0.23926		7.03941e-07
Tb927.1.4740	30.79	29.6	27.06	33.61	45.19	47.17		0.344		0.52655		1
Tb927.1.4760	31.17	34.02	26.78	46.61	49.34	55.86		0.34		0.723032		0.116139
Tb927.1.4780	27.11	28.79	28	36.1	34.1	38.01		0.331		0.367091		0.27639
Tb927.1.4800	32.73	32.32	24.82	38.34	37.72	43.59		0.32		0.412909		0.515974
Tb927.1.4810	19.01	20.49	18.78	30.81	29.2	28.22		0.319		0.598268		0.730202
Tb927.1.540	34.65	41.29	32.18	38.49	41.38	42.43		0.378		0.177791		0.00418754
Tb927.1.560	33.13	35.95	31.96	36.88	29.08	40.6		0.323		0.0767394		0.00195778
Tb927.1.610	47.1	54.08	44.99	87.21	80.92	83		0.369		0.780787		0.0625473
Tb927.1.630	68.12	65.53	64.34	117	100.15	127.16		0.379		0.798281		0.0555226
Tb927.1.640	20.63	21.8	18.79	33.48	37.19	39.17		0.333		0.843329		0.00842358
Tb927.1.650	22.98	24.3	20.46	49.84	42.41	38.52		0.347		0.948952		0.0221869
Tb927.1.670	34.48	39.83	34.73	38.76	42.55	44.95		0.367		0.21154		0.0174009
Tb927.1.690	34.05	41.39	31.76	37.44	35.44	34.25		0.321		-0.000942366		0.0034714
Tb927.1.730	37.42	44.67	35.75	50.26	46.76	52.29		0.32		0.341481		0.198043
Tb927.1.740	46.31	46.74	42.59	62.34	63.59	71.55		0.39		0.541924		0.96585
Tb927.1.750	28.95	33.27	25.61	52.43	62.09	67.64		0.347		1.05242		3.08001e-06
Tb927.1.760	25.76	26.55	21	35.73	35.5	36.95		0.324		0.561352		0.825345
Tb927.1.780	28.3	27.87	21.95	40.62	38.1	42.7		0.361		0.636242		0.531046
Tb927.1.790	22.98	28.96	22.46	26.46	29.97	27.56		0.31		0.174915		0.0101098
Tb927.1.820	30.6	27.72	26.19	45.35	51.97	55.38		0.337		0.853506		0.0220328
Tb927.1.830	22.32	25.48	24.08	33.12	34.11	34.62		0.318		0.502784		0.902295
Tb927.1.840	60.85	68.66	54.23	63.58	59.67	62.6		0.315		0.016473		0.000531471
Tb927.1.860	73.14	85.32	74.8	106.62	118.43	119.79		0.366		0.563988		0.812219
Tb927.1.870	34.53	36.73	29.6	60.96	56.07	57		0.34		0.786982		0.0597904
Tb927.1.880	43.87	53.35	43.6	24.73	42.06	45.09		0.345		-0.3319		3.07657e-06
Tb927.1.890	36.39	31.22	31.61	106.85	86.42	93.87		0.332		1.53305		1.47987e-09
Tb927.1.990	51.6	48.11	50.08	90.67	88.77	83.05		0.435		0.809321		0.0402214
Tb927.10.10000	195.55	201.42	172.39	143.18	139.36	139.87		0.331		-0.430697		4.54631e-20
Tb927.10.10010	81.58	73.13	75.49	80.32	63.01	74.92		0.411		-0.0769062		4.46328e-05
Tb927.10.10020	19.69	22.45	18.52	31.8	37.15	37.65		0.357		0.81339		0.0358356
Tb927.10.10030	99.62	108.27	86.28	113.17	106.77	106.64		0.38		0.150786		0.00879167
Tb927.10.10050	70.51	84.78	71.98	68.3	117.1	125.32		0.351		0.451208		0.798789
Tb927.10.10070	29.48	32.87	26.48	31.47	30.13	32.77		0.348		0.0872813		0.0005607
Tb927.10.10080	41.54	44.69	43.06	67.36	55.63	55.67		0.363		0.466606		0.784945
Tb927.10.10090	34.41	38.82	32.42	42.64	48.75	54.21		0.35		0.462718		0.648114
Tb927.10.10100	20.38	20.48	20.33	52.14	55.12	55.85		0.33		1.41448		1.15274e-13
Tb927.10.10110	54.64	72.88	52.11	106.29	80.85	93.76		0.386		0.645028		0.497854
Tb927.10.10120	28.56	27.96	26.04	56.69	58.59	57.46		0.357		1.06509		3.76926e-05
Tb927.10.10130	54.29	57.94	50.89	60.25	58.51	67.34		0.386		0.190144		0.00764375
Tb927.10.10140	219.36	248.37	198.69	351.77	321.22	336.02		0.382		0.598437		0.539011
Tb927.10.10150	31.33	37.73	30.65	46.2	54.04	57.8		0.365		0.66448		0.337477
Tb927.10.10160	40.19	56.25	42.88	73.1	72.99	82.86		0.355		0.71663		0.164913
Tb927.10.10170	25.01	27.85	27.17	51.07	45.62	52.48		0.334		0.898345		0.0120707
Tb927.10.10190	25.95	29.37	25.27	50.28	54.14	54.86		0.314		0.982892		0.000147084
Tb927.10.10200	27.95	27.7	24.84	52.98	50.3	48.26		0.36		0.912817		0.00240097
Tb927.10.10300	23.01	21.34	20.07	27.78	27.41	27.31		0.317		0.356885		0.279139
Tb927.10.10310	56.43	58.06	47.32	41.28	39.34	45.5		0.341		-0.359504		1.37884e-12
Tb927.10.10320	93.47	109.31	89.63	171.49	157.36	169.75		0.404		0.76989		0.0609102
Tb927.10.10330	37.23	41.52	31.33	43.16	46.92	49.98		0.352		0.347493		0.231404
Tb927.10.10340	44.51	45.82	36.88	71.22	81.3	79.62		0.379		0.867783		0.00229857
Tb927.10.10380	54.3	57.36	44.1	92.28	84.72	91.02		0.358		0.783016		0.0371847
Tb927.10.10390	180.08	201.54	176.15	157.14	173.54	182.92		0.404		-0.119025		1.99523e-09
Tb927.10.10400	42.38	49.05	42.64	56.51	57.52	60.26		0.398		0.378503		0.370715
Tb927.10.10410	29.7	27.87	25.11	36.28	38.26	38.16		0.338		0.446877		0.63152
Tb927.10.10420	43.02	36.41	35.65	40.7	31.18	28.51		0.396		-0.197022		0.000570339
Tb927.10.10430	24.61	24.26	26.17	46.44	41.79	48.26		0.306		0.863064		0.0463817
Tb927.10.1060	244.88	266.6	226.55	178.59	196.55	209.72		0.393		-0.335588		6.17855e-17
Tb927.10.10600	83.28	94.14	77.09	127.16	88.82	110.95		0.423		0.361259		0.442387
Tb927.10.10610	114.79	118.24	90.74	111.24	105.64	115.35		0.361		0.037213		3.01425e-05
Tb927.10.10620	27.58	32.32	25.63	43.12	43.12	41.66		0.366		0.580514		0.769931
Tb927.10.10630	50.79	50.07	48.77	81.66	73.41	74.98		0.376		0.620548		0.564503
Tb927.10.10650	39.37	36.01	35.02	45.49	47.21	49.16		0.359		0.361728		0.257875
Tb927.10.10670	89.35	91.21	81	51.06	49.15	56.28		0.339		-0.741071		6.52176e-26
Tb927.10.10680	14.86	14.12	13.68	21.33	24	26.3		0.3		0.74768		0.151187
Tb927.10.10690	28.54	30.96	32.75	50.43	53.79	50.89		0.348		0.749671		0.169108
Tb927.10.10700	45.35	51.42	42.82	59.85	56.99	62.24		0.346		0.359409		0.275419
Tb927.10.10710	34.53	34.7	34.53	52.57	56.21	61.42		0.321		0.713981		0.227412
Tb927.10.10720	46.69	56.84	45.73	112.81	105.84	111.95		0.312		1.14726		1.14403e-07
Tb927.10.10730	26.81	32.2	25.56	46.12	53.75	56.89		0.337		0.89034		0.00158124
Tb927.10.10740	20.11	20	17.23	20.16	25.84	24.49		0.301		0.297877		0.168123
Tb927.10.10750	26.91	30.25	26.22	44.7	50.42	56.31		0.333		0.860878		0.00424576
Tb927.10.10770	148.57	160.72	130.6	90.4	111.17	118.95		0.357		-0.456728		6.68955e-20
Tb927.10.10780	47.35	53.16	47.26	73.98	74.72	82.03		0.397		0.642852		0.526596
Tb927.10.10800	26.19	33.37	26.51	42.75	42.67	44.5		0.318		0.594041		0.692943
Tb927.10.10810	11.98	13.29	13.04	20.5	25.89	25.93		0.302		0.916674		0.0214769
Tb927.10.10820	42.72	47.65	40.68	62.84	65.65	67.7		0.314		0.582134		0.741852
Tb927.10.10830	86.66	92	78.73	50.11	50.63	49.86		0.357		-0.773234		1.11219e-25
Tb927.10.10840	18.28	19.51	18.18	56.87	59.81	64.7		0.297		1.69629		4.02331e-23
Tb927.10.10850	68.86	73.5	60.65	78.8	89.33	92.69		0.381		0.361504		0.171364
Tb927.10.10870	20.19	22.19	19.58	30.26	31.84	28.77		0.361		0.552467		0.904425
Tb927.10.10880	66.07	75.38	62.15	111.86	117.92	125.2		0.394		0.802		0.0179158
Tb927.10.10990	52.17	61.44	42.9	52.33	64.2	63.25		0.357		0.199978		0.0115928
Tb927.10.11000	34.39	38.81	34.34	65.33	65.39	72.01		0.363		0.914686		0.00403499
Tb927.10.11010	21.66	25.32	20.73	44.12	44.04	51.73		0.345		1.04685		0.000186798
Tb927.10.11020	40.29	41.28	35.95	33.17	39.06	37.86		0.372		-0.0942229		2.61795e-08
Tb927.10.11030	116.15	120.2	112.82	94.33	76.43	84.21		0.387		-0.453602		4.03956e-17
Tb927.10.11040	33.75	39.02	36.47	33.46	39.41	39.58		0.326		0.0417824		6.36698e-05
Tb927.10.11050	45.59	48.01	40.56	52.45	43.35	48.37		0.303		0.103816		0.00568865
Tb927.10.11070	12.83	13.31	14.86	25.67	25.16	28.24		0.32		0.947507		0.0173958
Tb927.10.11080	40.07	46.69	38.44	30.92	73.08	69.34		0.465		0.46937		0.906025
Tb927.10.11090	37.78	45.34	34.09	64.05	71.31	78.37		0.352		0.866694		0.00485517
Tb927.10.1110	15.88	18.92	15.79	28.89	35.66	37.8		0.351		1.01659		4.39847e-05
Tb927.10.11100	33.75	33.99	29.16	51.27	50.22	56.26		0.344		0.703071		0.200428
Tb927.10.11110	23.89	22.74	21.82	56.48	61.01	67		0.321		1.43042		8.22693e-15
Tb927.10.11120	33.22	25.44	23.16	60.27	47.76	49.45		0.355		0.944643		0.0609348
Tb927.10.11130	32.15	36.98	31.29	46.91	48.04	49.95		0.343		0.529011		1
Tb927.10.11140	25.77	29.98	24.18	58.55	68.97	77.26		0.35		1.35727		1.91919e-12
Tb927.10.11150	113.4	122.9	103.4	128.29	124.52	129.08		0.361		0.168896		0.00150208
Tb927.10.11160	64.5	73.3	58.36	100.58	102.96	108.88		0.359		0.671456		0.28522
Tb927.10.11170	23.42	27.08	23.15	36.91	42.69	43.77		0.338		0.744234		0.0719865
Tb927.10.11180	34.51	38.01	30.43	38.49	36.74	39.36		0.326		0.154537		0.00479532
Tb927.10.11190	39.56	42.62	38.87	91.52	93.53	91.02		0.358		1.18943		9.60203e-08
Tb927.10.1120	51.62	59.63	44.6	62.13	75.68	80.95		0.384		0.489191		0.852134
Tb927.10.11200	40.97	38.01	29.37	84.3	73.69	78.43		0.301		1.12565		2.72263e-06
Tb927.10.11210	29.15	27.09	28.27	29.29	30.44	29.77		0.306		0.0827656		0.000726931
Tb927.10.11220	189.66	227.18	182.35	134.42	122.78	137.99		0.375		-0.600467		8.6511e-26
Tb927.10.11230	35.46	36.53	26.67	38.88	38.13	37.03		0.365		0.209003		0.0739537
Tb927.10.11240	51.61	53.2	39.23	102.39	97.89	101.94		0.357		1.06913		1.10948e-05
Tb927.10.11250	62.13	62.64	56.12	103.82	111.48	114.07		0.417		0.864597		0.00286225
Tb927.10.11260	120.49	124.09	102.78	217.87	170.91	181.37		0.394		0.71491		0.218076
Tb927.10.11270	77.62	78.66	65.73	53.97	42.13	42.86		0.386		-0.675955		3.57358e-18
Tb927.10.11290	38.9	45.13	35.19	43.63	39.45	43.09		0.298		0.0817426		0.00247765
Tb927.10.11300	1158.45	1227.98	1034	1292	1049.79	1214.08		0.399		0.0560249		1.00875e-05
Tb927.10.11310	108.22	111.04	100.76	194.18	183.98	183.63		0.383		0.811869		0.0149916
Tb927.10.11330	81.45	78.76	72.9	166.71	151.67	171.29		0.377		1.0708		1.63443e-05
Tb927.10.11340	78.27	88.61	72.89	75.03	94.55	92.43		0.371		0.127971		0.000179452
Tb927.10.11350	46.31	48.34	45.74	44.67	49.23	43.69		0.379		-0.0290646		0.003277
Tb927.10.11360	28.55	31.29	25.08	50.16	54.25	55.07		0.331		0.909199		0.00256299
Tb927.10.11370	71.03	70.7	54.41	65.9	53.36	67.21		0.442		-0.0729402		7.74146e-05
Tb927.10.11380	52.52	63.05	46.86	42.65	37.37	43.33		0.385		-0.39706		2.79311e-12
Tb927.10.11390	1964.23	1879.27	1729.42	1387.56	1230.96	1390.32		0.47		-0.475249		5.67825e-23
Tb927.10.11400	18.29	17.73	16.19	32.9	30.56	35.45		0.327		0.92179		0.0114433
Tb927.10.11410	40.62	37.71	36.36	62.48	60.71	59.22		0.343		0.669445		0.342731
Tb927.10.11420	21.99	28.08	22.51	32.32	37.71	37.97		0.317		0.573387		0.770109
Tb927.10.11430	30.89	38.58	30.47	50.02	44.9	47.8		0.336		0.514053		1
Tb927.10.11440	75.85	86.94	71.88	49.7	71.82	74.74		0.323		-0.257867		2.47975e-10
Tb927.10.11450	25.68	33.79	26.99	20.37	45.33	49.88		0.333		0.418787		0.805219
Tb927.10.11470	18.85	19.18	16.8	25.67	34.44	33.18		0.327		0.766757		0.0920109
Tb927.10.11480	42.14	47.27	36.83	49.36	56.42	59.07		0.368		0.384985		0.32919
Tb927.10.11510	42.48	45.75	40.91	52.02	57.4	56.98		0.371		0.36572		0.210357
Tb927.10.11520	89.64	118.78	91.74	104.86	94.12	107.7		0.395		0.0310024		0.000215611
Tb927.10.11530	45.52	50.08	35.25	58.71	45.84	52.73		0.382		0.265421		0.214783
Tb927.10.11550	38.59	40.43	32.04	46.98	56.7	55.84		0.335		0.522398		1
Tb927.10.11560	25.15	28.16	24.45	35.61	40.89	40.18		0.32		0.585457		0.749808
Tb927.10.11570	30.68	33.1	30.51	38.55	37.15	42.24		0.331		0.322876		0.133446
Tb927.10.11580	39.16	40.66	35.5	54.67	65.79	71.3		0.348		0.733659		0.0815291
Tb927.10.11590	30.89	29.28	25.41	56.07	54.35	61.04		0.366		1.00253		3.89566e-05
Tb927.10.11600	30.32	31.84	25.54	48.02	46.3	49.16		0.304		0.710201		0.139426
Tb927.10.11610	30.72	29.99	25.22	38.23	34.46	35.95		0.354		0.338322		0.349955
Tb927.10.11630	29.3	37.88	29.92	8.24	22.79	25.39		0.36		-0.783265		1.0377e-06
Tb927.10.11640	31.38	33.39	26.99	61.65	54.93	56.72		0.338		0.917334		0.00463111
Tb927.10.11650	64.49	68.28	54.15	58.59	58.62	59.21		0.401		-0.0834068		1.63399e-07
Tb927.10.11660	59.18	66.18	52.08	68.38	67.01	66.73		0.383		0.187881		0.00952893
Tb927.10.11670	35.66	37.95	32.91	71.46	66.28	61.95		0.359		0.906638		0.0069133
Tb927.10.11680	21.09	24.68	20.75	42.85	48.59	48.35		0.331		1.0714		7.399e-06
Tb927.10.11690	26.08	27.81	24.31	40.93	45.87	46.39		0.33		0.768245		0.106986
Tb927.10.11700	90.59	96.96	90.58	127.77	143.35	132.46		0.382		0.537095		0.960967
Tb927.10.11720	35.6	38.95	30.71	63.75	68.33	72.62		0.35		0.959554		0.000260197
Tb927.10.11730	35.6	39.56	34.18	45.09	52.6	53.33		0.348		0.465918		0.694959
Tb927.10.11750	53.29	57.47	43.33	68.07	64.5	68.23		0.359		0.381986		0.425688
Tb927.10.11760	101.81	114.56	91.22	37.85	75.69	75.87		0.408		-0.699496		4.47138e-12
Tb927.10.11770	100.2	112.26	86.92	182.03	156.78	157.59		0.364		0.729525		0.0902941
Tb927.10.11780	62.15	75.35	57.83	94.2	117.76	129.64		0.373		0.806394		0.0496201
Tb927.10.1180	37.02	41.1	34.27	51.07	48.23	53.62		0.332		0.444263		0.616368
Tb927.10.11800	41.55	43.63	33.3	50.06	50.5	47.56		0.34		0.322123		0.160629
Tb927.10.11810	36.47	35.88	33.11	38.87	37.74	45.04		0.329		0.20604		0.014045
Tb927.10.11820	30.64	38.21	31.6	42.74	43.32	44.07		0.379		0.373476		0.336988
Tb927.10.11830	38.01	41.78	32.97	62.63	66.04	68.5		0.334		0.806185		0.0307881
Tb927.10.11870	82.25	88.33	74.88	96.29	89.09	95.48		0.351		0.194363		0.00786319
Tb927.10.11880	29.35	34.56	29.24	67.23	65.23	70.09		0.347		1.12065		2.93838e-07
Tb927.10.11890	56.48	67.52	52.76	63.94	66.01	66.01		0.388		0.148767		0.00431574
Tb927.10.1190	19.56	21.26	18.22	41.15	41.13	45.33		0.318		1.11198		1.14344e-05
Tb927.10.11900	64.42	70.77	60.2	95.2	78.91	83.23		0.414		0.397319		0.553795
Tb927.10.11910	31.44	31.72	28.56	58.21	54.48	60.48		0.31		0.916881		0.00402378
Tb927.10.11920	66.96	71.49	53.92	71.69	61.86	69.62		0.353		0.0788036		0.0127142
Tb927.10.11930	34.41	39.25	30.59	52.48	48.57	49.84		0.365		0.53345		0.962441
Tb927.10.11940	14.66	14.99	14.86	47	49.17	50.99		0.336		1.72518		2.89064e-20
Tb927.10.11950	33.31	40.39	33.22	58.6	48.65	55.72		0.403		0.608075		0.609974
Tb927.10.11960	40.64	41.94	38.35	89.67	76.1	86.39		0.35		1.06017		3.74882e-05
Tb927.10.11970	112.21	124.53	97.22	68.23	69.85	78.7		0.385		-0.623444		4.75759e-23
Tb927.10.11980	32.42	36.48	29.95	44.86	37.21	44.36		0.358		0.355026		0.363036
Tb927.10.11990	52.53	48.82	48.57	30	28.07	31.96		0.38		-0.735715		4.54726e-18
Tb927.10.1200	33.63	39.67	29.17	62.8	65.83	63.79		0.332		0.909057		0.00491974
Tb927.10.12010	50.56	49.21	46.22	144.47	125.52	128.31		0.358		1.44799		9.95542e-12
Tb927.10.12020	29.58	29.49	21.88	38.12	34.85	34.35		0.346		0.406816		0.557195
Tb927.10.12030	42.7	41.86	39.37	65.34	70.74	76.13		0.388		0.775967		0.0336525
Tb927.10.12040	80.31	96.98	76.32	79.59	119.05	121.76		0.398		0.337263		0.341067
Tb927.10.12050	23.52	26.54	22.88	44.62	45.7	44.62		0.372		0.887536		0.00400581
Tb927.10.12060	11.71	14	13.41	6.93	17.79	21.43		0.342		0.238424		0.505263
Tb927.10.12080	32.51	29.38	27.99	41.53	35.62	43.33		0.329		0.422722		0.500318
Tb927.10.1210	44.24	49.22	43.05	68.96	72.37	69.85		0.365		0.629467		0.446425
Tb927.10.12110	23.17	23.08	22.92	52.21	45.18	44.17		0.353		1.0332		0.000511642
Tb927.10.12120	26.64	30.08	25.17	43	56.3	63.88		0.352		0.994705		0.00735563
Tb927.10.12130	28.02	30.78	25.12	28.96	30.3	32.52		0.367		0.129165		0.00237164
Tb927.10.12140	11.51	10.44	10.78	28.31	30.89	28.43		0.329		1.42081		3.18723e-11
Tb927.10.12160	13.53	14.74	12.19	35.49	32.85	40.38		0.324		1.42605		1.09419e-07
Tb927.10.12170	26.3	28.78	24.45	83.94	73.41	88.04		0.307		1.62551		4.43302e-16
Tb927.10.12190	11.55	11.4	12.44	26.78	32.82	28.39		0.366		1.314		0.00127317
Tb927.10.12200	31.64	32.75	27.03	76.47	75.82	67.96		0.331		1.26856		6.05783e-07
Tb927.10.12220	22.66	26.65	20.02	41.77	42.03	40.37		0.34		0.840765		0.0531249
Tb927.10.12230	27.01	32.28	28.09	49.15	56.32	60.19		0.349		0.92285		0.00526431
Tb927.10.12240	160.96	172.85	145.98	96.76	85.3	102.1		0.386		-0.7557		3.2953e-30
Tb927.10.12250	17.5	18.29	17.49	34.32	28.91	36.78		0.346		0.908478		0.00717822
Tb927.10.1230	32.22	32.73	28.44	113.44	112.41	106.64		0.361		1.83197		1.35426e-24
Tb927.10.12300	17.78	21.43	20.88	30.83	29.4	26.15		0.442		0.523572		1
Tb927.10.12310	28.65	30.62	25.06	50.93	56.61	57.65		0.369		0.970008		0.000247954
Tb927.10.12320	27.22	28.75	26.35	39.17	35.68	39.67		0.312		0.476285		0.812853
Tb927.10.12330	133.66	179.12	161.76	132.23	108.4	115.49		0.403		-0.414166		6.0258e-07
Tb927.10.12350	35.63	35.25	28.12	61.79	56.93	64.29		0.355		0.886422		0.016286
Tb927.10.12360	73.85	102.43	74.51	90.6	102.37	97.37		0.429		0.211264		0.0511341
Tb927.10.12370	91.34	95.69	84.15	47.29	53.73	59.48		0.37		-0.756677		6.05606e-32
Tb927.10.12380	28.45	30.62	24.85	40.43	40.4	44.28		0.341		0.576111		0.761372
Tb927.10.12390	54.71	54.28	46.33	84.85	77.33	83.46		0.4		0.661302		0.3146
Tb927.10.1240	42.96	46.66	40.74	54.15	45.59	54.99		0.347		0.247252		0.0769392
Tb927.10.12400	18.71	14.84	15.24	15.05	17.69	19.56		0.323		0.100225		0.0159669
Tb927.10.12410	61.85	81.99	62.65	73.81	67.96	60.32		0.363		-0.031074		0.000337713
Tb927.10.12420	64.04	55.11	44.15	65.71	60.89	65.57		0.35		0.234858		0.134404
Tb927.10.12430	102.87	122.19	96.05	63.98	61.03	68.4		0.375		-0.731405		6.90759e-30
Tb927.10.12440	22.01	25.1	22.27	33.22	31.39	30.71		0.339		0.458259		0.683136
Tb927.10.12450	30.73	27.65	24.46	64.65	53.69	59.14		0.325		1.09926		0.00171128
Tb927.10.12460	94.37	111.52	74.7	153.88	136.21	169.32		0.357		0.711319		0.156687
Tb927.10.12470	28.1	29.41	25.11	56.38	55.2	57.24		0.335		1.03092		3.75981e-05
Tb927.10.12480	20.18	21.49	16.88	35.84	36.77	36.22		0.336		0.894335		0.0341838
Tb927.10.12490	32.02	35.97	28.56	52.18	58.49	61.87		0.352		0.837583		0.00600985
Tb927.10.1250	84.72	100.42	76.18	104.43	95.97	101.55		0.384		0.208492		0.0170596
Tb927.10.12520	41.04	41.5	33.8	83.57	82.57	84.84		0.35		1.10923		2.23527e-07
Tb927.10.12530	52.47	52.14	44.69	108.65	92.31	97.49		0.34		0.999275		0.002899
Tb927.10.12540	55.36	56.18	47.98	54.48	47.22	46.47		0.344		-0.106484		2.591e-07
Tb927.10.12550	15.92	15.99	16.42	32.21	27.05	28.99		0.326		0.868677		0.015524
Tb927.10.12590	46.2	54.08	42.33	105.98	120.22	129.44		0.405		1.31834		7.90292e-14
Tb927.10.12600	37.98	43.55	33.72	53.54	52.43	57.42		0.316		0.503553		0.945095
Tb927.10.12620	40.74	44.3	41.33	31.94	43.62	49.19		0.356		-0.0186142		0.000120128
Tb927.10.12630	28.05	35.94	28.59	48.35	44.06	49.9		0.398		0.620265		0.635523
Tb927.10.12640	42.46	49.81	40.15	50.77	55.8	64.87		0.347		0.372583		0.221391
Tb927.10.12660	14.57	17.09	14.32	9.57	57.89	66.21		0.364		1.5396		0.274898
Tb927.10.12670	23.12	24.95	23.04	47.21	65.37	69.5		0.37		1.35645		2.21189e-05
Tb927.10.12690	47.58	50.02	44.98	86.78	82.97	82.76		0.386		0.824569		0.0249595
Tb927.10.1270	13.78	13.64	12.48	35.58	34.52	37.03		0.357		1.4249		3.23627e-13
Tb927.10.12700	419.08	466.71	367.82	296.62	324.75	336.26		0.413		-0.388548		4.51995e-19
Tb927.10.12710	425.2	471.54	372.04	438.2	466.17	510.72		0.415		0.157452		0.000399988
Tb927.10.12720	45.28	52.14	41.91	59.07	65.81	65.17		0.384		0.447873		0.58446
Tb927.10.1280	138.66	150.01	142.94	165.67	156.38	168.74		0.39		0.185378		0.00720598
Tb927.10.12810	68.94	76.61	58.44	92.28	94.86	105.83		0.326		0.522255		1
Tb927.10.12820	39.72	43.25	35.46	150.6	170.27	192.5		0.374		2.11596		6.08553e-45
Tb927.10.12830	21.32	21.67	20.98	30.11	27.79	28.66		0.316		0.436305		0.67548
Tb927.10.12840	330.78	361.98	298.86	84.38	80.08	88.83		0.379		-1.969		4.92554e-120
Tb927.10.12850	137.95	143.75	125.8	832.53	1044.9	1149.02		0.349		2.89275		8.58321e-35
Tb927.10.12860	46.91	51.18	43.37	48.5	47.88	56.37		0.383		0.110778		0.000779578
Tb927.10.12870	44.68	48.78	39.13	62.07	67.04	77.4		0.343		0.63924		0.375976
Tb927.10.12880	26.59	29.44	24.16	43.54	35.66	40.67		0.338		0.579976		0.756951
Tb927.10.12890	148.41	154.44	134.32	198.88	214.83	225.35		0.378		0.547757		0.899979
Tb927.10.12900	78.77	51.19	56.61	74.59	76.44	75.34		0.367		0.278966		0.388418
Tb927.10.12910	28.58	29.4	26.58	50.79	56.4	54.15		0.339		0.932057		0.000869825
Tb927.10.12920	35.65	40.63	30.12	45.14	46.77	48.33		0.338		0.3984		0.361347
Tb927.10.12930	59.64	59.57	51.15	96.84	86.78	84		0.39		0.651599		0.358461
Tb927.10.12940	94.63	93.07	88.05	152.5	169.45	180.57		0.348		0.86582		0.00273756
Tb927.10.12950	34.27	39.23	32.25	72.9	76.08	83.72		0.365		1.13781		6.68124e-08
Tb927.10.12960	97.67	99.7	93.36	226.33	202.7	220.75		0.389		1.16027		3.20602e-08
Tb927.10.12970	35.84	40.66	34.26	47.18	48.37	49.4		0.331		0.388118		0.419982
Tb927.10.12980	25.8	25.42	23.94	40.05	41.6	42.13		0.323		0.719741		0.167273
Tb927.10.12990	37.76	41.62	35.18	66.98	58.61	66.66		0.341		0.74688		0.152933
Tb927.10.1300	22.04	23.97	18.25	26.51	25.52	28.14		0.338		0.319141		0.285405
Tb927.10.13000	73.97	82.68	66.06	43.23	42.91	46.44		0.382		-0.748303		1.61148e-28
Tb927.10.13020	21.73	23.41	20.64	48.58	42.14	41.25		0.314		1.00449		0.000185969
Tb927.10.13030	20.63	19.38	19.97	55.87	44.34	39.87		0.31		1.2237		0.00454649
Tb927.10.13090	22.93	25.32	20.54	57.33	59.7	70.02		0.357		1.44315		2.37059e-14
Tb927.10.1310	25.47	28.44	23.62	34.17	35.28	38.69		0.328		0.480074		0.776661
Tb927.10.13100	21.85	20.44	17.69	46.6	46.66	48.95		0.4		1.24547		2.25145e-08
Tb927.10.13110	165.81	127.89	135.53	191.05	149.14	168.61		0.396		0.245348		0.209554
Tb927.10.13120	19.34	20.68	17.51	25.84	19.64	27.14		0.348		0.336052		0.247288
Tb927.10.13130	61.86	61.41	50.31	36.61	35.11	37.03		0.386		-0.674585		1.12246e-22
Tb927.10.13140	130.45	137.89	100.36	131.82	129.1	144.7		0.379		0.137681		0.00377804
Tb927.10.13150	26.66	28.29	23.52	41.46	44.82	46.53		0.333		0.759151		0.0804567
Tb927.10.13160	20.38	18.59	17.52	33.37	31.48	30.02		0.328		0.747956		0.166228
Tb927.10.13170	26.11	22.63	21.35	33.44	39.57	36.46		0.335		0.643255		0.574632
Tb927.10.13180	56.2	60.89	50.6	43.94	54.53	49.81		0.359		-0.177473		1.2993e-10
Tb927.10.13190	28.73	28.71	23.34	41.4	41.34	42.45		0.353		0.632049		0.488465
Tb927.10.1320	24.16	25.89	20.89	46.62	43.32	48.38		0.337		0.963339		0.000709145
Tb927.10.13200	30.98	33.32	27.44	44.6	45.76	46.3		0.333		0.574968		0.751527
Tb927.10.13210	27.31	28.08	24.35	44.1	44.05	46.13		0.333		0.751869		0.108059
Tb927.10.13220	22.1	22.35	19.6	32.16	31.03	36.42		0.335		0.637092		0.466955
Tb927.10.13230	32.66	33.71	27.85	40.64	38.96	41.73		0.338		0.364831		0.265409
Tb927.10.13240	36.78	40.71	30.12	41.82	45.23	52.43		0.347		0.374246		0.309409
Tb927.10.13250	32.25	34.13	29.36	41.1	55.15	61.56		0.322		0.720995		0.289477
Tb927.10.13260	30.4	33.86	28.2	58.77	69.02	73.3		0.344		1.12094		1.25507e-07
Tb927.10.13270	31.89	37.03	30.15	26.42	27.59	29.43		0.358		-0.247709		2.70359e-10
Tb927.10.13280	67.18	73.77	64.93	43.92	59.39	63.07		0.349		-0.307322		3.13282e-16
Tb927.10.13290	46.06	47.55	36.29	95.47	100.81	109.17		0.333		1.23353		1.97361e-09
Tb927.10.1330	26.61	28.61	21.63	35.87	33.27	38.93		0.349		0.491849		0.890102
Tb927.10.13300	46.91	56.94	46.25	59.24	53.94	58.39		0.366		0.192873		0.0201593
Tb927.10.13310	49.86	49.47	47.8	36.36	31.99	28.26		0.364		-0.606847		1.30426e-15
Tb927.10.13320	75.98	87.78	85.3	101.6	98.73	105.2		0.373		0.294821		0.142199
Tb927.10.13330	39.79	45.09	37.26	42.43	53.29	58.77		0.344		0.338978		0.113732
Tb927.10.13350	28.9	32.35	25.88	33.52	37.26	42.62		0.331		0.380179		0.263181
Tb927.10.13360	269.75	318.83	243.85	115.02	123.54	141.97		0.415		-1.12932		1.10429e-55
Tb927.10.13370	80.07	91.25	79.03	91.77	94.54	100.44		0.391		0.195847		0.0175246
Tb927.10.13380	18.71	20.86	18.88	36.96	32.34	38.52		0.304		0.88335		0.0104288
Tb927.10.1340	25.04	28.58	23.31	29.26	29.64	27.31		0.311		0.164309		0.0129622
Tb927.10.13430	12.42	13.03	10.12	35.05	47.79	48.76		0.375		1.88743		2.33715e-12
Tb927.10.13440	25.53	30.01	22.98	35.06	32.54	33.4		0.351		0.363223		0.288762
Tb927.10.13450	39.94	43.8	37.9	41.79	49.34	51.75		0.341		0.232186		0.0100878
Tb927.10.13470	29.34	29.81	23.87	31.69	37.65	39.71		0.333		0.393459		0.361395
Tb927.10.13520	85.26	93.2	80.23	155.01	137.11	158.37		0.365		0.800271		0.0126168
Tb927.10.13540	12.17	12.96	12.1	42.55	45.44	48.86		0.377		1.87806		9.21903e-29
Tb927.10.13550	23.94	24.13	21.5	36.99	39.78	44.59		0.342		0.802756		0.0225267
Tb927.10.13600	77.78	89.18	64.62	45.27	47.63	50.9		0.394		-0.687447		2.19981e-15
Tb927.10.13610	45.02	54.45	41.78	52.15	56.31	64.2		0.357		0.289683		0.0567924
Tb927.10.13620	64.11	69.99	62.87	55.53	50.76	56.88		0.388		-0.2716		8.94653e-12
Tb927.10.13640	34.8	39.4	30.78	55.23	58.34	59.47		0.348		0.720991		0.157556
Tb927.10.13650	37.16	32.57	36.64	103.83	78.08	76.39		0.357		1.27996		0.00401749
Tb927.10.13660	40.66	44.92	37.56	42.56	47.72	51.17		0.355		0.199993		0.00736676
Tb927.10.13670	82.59	89.69	74.21	86.42	88.91	87.67		0.409		0.0935337		0.000420344
Tb927.10.13680	26.63	30.78	25.22	31.72	32.75	40.53		0.319		0.345652		0.222509
Tb927.10.1370	24.79	24.43	20.93	46.11	40.5	44.32		0.291		0.900281		0.0219093
Tb927.10.13710	162.84	171.44	146.63	174.49	166.55	179.86		0.405		0.11524		0.00029276
Tb927.10.13720	167.68	193.32	153.58	234.06	228.41	230.98		0.381		0.430396		0.482278
Tb927.10.13730	131.22	137.17	99.45	89.78	81.65	86.41		0.375		-0.512602		4.13431e-18
Tb927.10.13740	107.05	109.91	92.93	82.78	75.48	82.83		0.379		-0.362184		8.35408e-17
Tb927.10.13750	43.78	41.8	34.35	59.69	62.6	63.14		0.328		0.628682		0.531777
Tb927.10.13760	72.79	79.54	77.59	120.31	129.08	144.21		0.386		0.775598		0.0792718
Tb927.10.13770	102.01	125.67	107.58	92.94	80.56	74.1		0.318		-0.437269		5.11559e-10
Tb927.10.13790	43.51	44.68	36.69	159.66	168.99	181.22		0.382		2.02959		9.53375e-47
Tb927.10.13800	118.65	123.84	112.68	106.09	111.61	120.14		0.385		-0.0721696		7.9205e-09
Tb927.10.13810	99.82	78.73	84.73	102.2	101.1	101.47		0.352		0.211123		0.061663
Tb927.10.13820	81.68	96.29	77.2	80.83	67.26	78.06		0.333		-0.174179		2.16527e-08
Tb927.10.13830	121.79	125.79	104.44	107.27	108.12	119.6		0.387		-0.0715394		6.46697e-08
Tb927.10.13840	40.78	45.3	36.86	45.95	42.95	55.54		0.337		0.232516		0.0238246
Tb927.10.13850	52.2	53	43.65	62.6	57.29	58.44		0.369		0.26069		0.0528301
Tb927.10.13860	38.7	41.73	34.77	129.08	134.65	146.94		0.384		1.83384		3.16194e-29
Tb927.10.13870	41.59	45.13	43.27	47.71	43.9	40.63		0.376		0.024758		0.000125449
Tb927.10.13880	23.83	26.47	24.23	29.61	29.6	32.72		0.332		0.302714		0.0806643
Tb927.10.13890	23.38	22.97	17.83	32.7	29.68	32.23		0.316		0.559869		0.833203
Tb927.10.1390	216.33	239.92	203.78	116.75	106.22	117.91		0.393		-0.953268		1.17986e-42
Tb927.10.13900	35.1	40.03	27.92	66.07	63.25	70.51		0.351		0.955429		0.00090879
Tb927.10.13910	113.58	122.8	97.55	74.42	71.66	76.21		0.369		-0.587103		8.07815e-20
Tb927.10.13920	95.17	99.28	85.67	174.58	190.03	200.19		0.372		1.0117		0.000318174
Tb927.10.13950	73.08	93.75	72.96	91.28	90.15	86.4		0.389		0.159546		0.0138265
Tb927.10.13960	71.81	75.98	62.86	78.59	79.02	81.14		0.366		0.180653		0.00370864
Tb927.10.13970	60.14	62.34	55.5	78.43	53.25	64.73		0.378		0.142153		0.0289452
Tb927.10.13980	33.69	34.04	30.57	43.03	41.21	41.28		0.387		0.352654		0.346114
Tb927.10.13990	28.31	27.45	28.27	35.53	26.5	30.06		0.345		0.13214		0.0164657
Tb927.10.14000	60.11	62.87	58.23	61.66	69.28	70.19		0.396		0.150466		0.000709419
Tb927.10.14010	81.46	94.7	73.64	130.7	130.03	133.04		0.383		0.65658		0.279315
Tb927.10.14020	39.88	50.78	40.15	79	73.5	77.93		0.288		0.816856		0.0243758
Tb927.10.14030	91.99	99.46	85.98	220.91	202.81	207.62		0.351		1.18629		1.89524e-09
Tb927.10.14040	47.49	58.4	45.27	90.54	87.43	90.22		0.35		0.827179		0.0196385
Tb927.10.1410	94.8	99.19	74.47	101.49	92.84	90.12		0.351		0.0834679		0.00127976
Tb927.10.14110	40.81	41.32	26.48	68.61	60.84	55.13		0.351		0.765089		0.230854
Tb927.10.14130	117.2	111.1	87.31	288.84	239.13	289.89		0.418		1.37371		3.02758e-10
Tb927.10.14140	179.58	191.42	156.44	1455.94	1545.41	1683.5		0.418		3.15092		2.47483e-140
Tb927.10.14150	92.14	100.44	80.39	342.86	341.5	356.55		0.448		1.93103		1.15349e-42
Tb927.10.14180	133.9	163.24	149.14	219.57	229.58	259.31		0.378		0.666737		0.257237
Tb927.10.14190	45.16	52.28	39.04	62.24	67.18	71.49		0.356		0.55786		0.836561
Tb927.10.1420	151.21	160.9	137.19	130.7	123.75	144.58		0.422		-0.171182		3.37805e-11
Tb927.10.14200	27.19	28.35	24.12	51.31	52.62	51.37		0.365		0.96313		0.00151008
Tb927.10.14210	78.32	88.11	72.58	170.6	157.13	165.89		0.353		1.04633		9.70782e-05
Tb927.10.14220	56.88	61.81	52.15	120.78	127.95	131.49		0.361		1.15419		1.91974e-07
Tb927.10.14230	25.1	25.99	22.9	42.84	54.91	61.89		0.341		1.10942		0.000303202
Tb927.10.14240	79.77	83.77	74.14	102.07	97.12	110.3		0.388		0.380872		0.237487
Tb927.10.14250	64.23	78.04	62.94	65.25	55.47	69.25		0.372		-0.111329		5.14038e-07
Tb927.10.14280	41.12	46.39	39.71	44.19	43.82	49.94		0.326		0.11682		0.00311855
Tb927.10.1430	58.28	68.27	52.19	115.71	119.21	132.27		0.385		1.03866		5.64258e-05
Tb927.10.14300	37.02	38.93	30.53	53.01	74.89	83.22		0.346		0.987481		0.0292872
Tb927.10.14310	63.19	70.07	47.73	99.86	95.27	99.97		0.345		0.705294		0.149154
Tb927.10.14320	34.43	37.36	30.29	50.13	54.99	61.01		0.351		0.702612		0.145751
Tb927.10.14330	76.91	86.21	67.36	53.71	60.21	66.72		0.409		-0.351524		3.80115e-16
Tb927.10.14340	56.82	62.1	52.62	63.92	72.24	77.6		0.357		0.317447		0.071278
Tb927.10.14360	48.68	54.81	44.69	94.08	93.53	104.23		0.372		0.977827		0.000304834
Tb927.10.14370	56.07	46.38	36.83	73.25	58.06	73.58		0.397		0.556861		0.875786
Tb927.10.14380	37.43	43.24	35.49	45.18	49.59	54.46		0.332		0.361424		0.189742
Tb927.10.14390	112.81	135.35	109.16	82.85	100.74	111.44		0.384		-0.276355		2.14103e-13
Tb927.10.1440	83.36	89.2	77.67	75.84	76.43	79.05		0.375		-0.113365		1.82113e-07
Tb927.10.14400	34.46	34.88	31.84	46.73	50.39	52.77		0.356		0.56698		0.802309
Tb927.10.14410	31.26	33.68	29.34	41.88	45.18	50.09		0.338		0.540731		0.967365
Tb927.10.14430	39.26	40.78	39.39	56.26	63.61	68.87		0.332		0.660235		0.33005
Tb927.10.14440	60.75	63.12	54.94	71	69.47	77.39		0.342		0.284974		0.082876
Tb927.10.14450	17.96	18.55	18.05	24.52	27.65	29.7		0.311		0.585491		0.83703
Tb927.10.14460	45.08	47.44	40.12	55.99	58.03	63.42		0.353		0.419815		0.414597
Tb927.10.14470	48.09	51.3	43.69	72.98	94.59	98.83		0.372		0.896772		0.00585138
Tb927.10.14480	17.9	20.2	18.26	21.12	35.72	38.82		0.328		0.763244		0.463475
Tb927.10.14490	144.3	159.95	121.58	140.55	177.39	182.31		0.39		0.232372		0.00770898
Tb927.10.1450	34.32	40.8	36.98	58.34	95.5	86.78		0.354		1.10197		0.0299576
Tb927.10.14500	174.25	198.14	150.4	225.79	256.78	307.84		0.396		0.59637		0.629704
Tb927.10.14510	67.71	71.12	57.63	87.29	97.8	108.02		0.37		0.577207		0.720758
Tb927.10.14520	57.02	65.07	51.27	76.92	79.6	86.21		0.334		0.485581		0.833091
Tb927.10.14530	115.44	122.92	101.82	123.76	120.98	117.93		0.384		0.0923591		0.000187103
Tb927.10.14560	31.69	33.84	28.55	54.44	45.49	51.75		0.348		0.689071		0.200473
Tb927.10.14570	42.05	42.76	35.14	42.77	43.12	47.72		0.361		0.155595		0.00298346
Tb927.10.14590	47.64	55.77	43.52	64.74	61.75	70.21		0.331		0.420868		0.58613
Tb927.10.1460	25.81	28.24	21.31	42.36	47.67	48.6		0.354		0.879369		0.00307651
Tb927.10.14610	40.73	45.42	39.1	52	53.61	57.26		0.345		0.37891		0.235499
Tb927.10.14640	24.82	27.57	17.67	23.96	26.59	24.71		0.327		0.103292		0.0584975
Tb927.10.14650	81.33	76.01	64.69	88.29	76.72	80.18		0.37		0.143146		0.0162701
Tb927.10.14660	54.15	64.06	57.77	84.44	73.12	74.98		0.368		0.402067		0.414424
Tb927.10.14680	85.2	90.52	84.86	55.49	54.97	48.32		0.384		-0.714697		1.65146e-24
Tb927.10.14690	45.02	51.99	43.45	107.84	89.47	106.06		0.393		1.11092		4.27984e-06
Tb927.10.14700	283.41	304.05	249.65	268.05	256.09	266.04		0.392		-0.0832359		1.20456e-08
Tb927.10.14720	58.27	61.9	52.17	77.74	69.31	77.22		0.353		0.379979		0.313239
Tb927.10.14730	98.77	117.81	86.54	180.42	186.09	212.73		0.414		0.934272		0.00029627
Tb927.10.14760	187.6	227.8	160.64	822.54	849.62	889.75		0.439		2.15298		1.69272e-54
Tb927.10.14770	52.72	57.5	49.52	64.76	66.87	75.6		0.381		0.375507		0.232227
Tb927.10.14780	63.12	65.44	57.83	144.93	131.42	133.79		0.408		1.13779		2.21942e-08
Tb927.10.14790	331.11	359.44	312.14	318.22	283.35	321.01		0.408		-0.12013		4.67165e-10
Tb927.10.14810	285.58	291.16	240.97	308.69	270.46	299.36		0.455		0.103469		0.000268903
Tb927.10.14860	84.45	96.37	74.14	78.53	82.34	81.16		0.381		-0.075085		7.42366e-08
Tb927.10.14870	86.02	85.35	75.78	53.4	49.71	51.99		0.34		-0.672188		3.77146e-26
Tb927.10.14880	30.15	33.53	25.46	42.78	44.73	46.84		0.329		0.591851		0.633145
Tb927.10.14890	45.34	51.8	45.82	488.43	546.88	582.26		0.391		3.50014		1.35277e-172
Tb927.10.1490	124.53	137.79	113.7	122.85	182.96	181.46		0.387		0.373912		0.403062
Tb927.10.14900	18.85	18.87	17.02	24.2	25.92	30.07		0.356		0.550827		0.930319
Tb927.10.14920	17.46	16.97	14.62	49.56	55.85	60.5		0.312		1.75808		5.59322e-27
Tb927.10.14980	59.76	67.79	53.49	77.19	90.9	94.17		0.385		0.534689		0.974987
Tb927.10.14990	85.51	97.19	83.2	122.68	140.62	149.18		0.363		0.63344		0.396126
Tb927.10.150	32	29.63	28.69	44.01	39.3	42.18		0.331		0.474455		0.817143
Tb927.10.1500	219.21	234.34	197.49	105.45	109.04	110.97		0.396		-1.00027		4.77427e-50
Tb927.10.15000	56.37	57.29	48.81	65.95	68.75	69.91		0.396		0.332703		0.142022
Tb927.10.15010	46.36	46.95	42.05	48.01	46.29	50.08		0.363		0.0930694		0.000500457
Tb927.10.15020	18.05	18.83	18.04	17.97	31.5	36.68		0.331		0.649519		0.77039
Tb927.10.15040	10.35	11.84	10.56	6.87	15.27	16.33		0.323		0.232239		0.399609
Tb927.10.15080	32.24	34.95	29.31	41.89	51.07	56.01		0.325		0.626421		0.451227
Tb927.10.1510	89.84	109.71	90.33	64.35	133.52	136.81		0.382		0.207327		0.302117
Tb927.10.15130	42.71	43.99	43.91	53.5	53.36	53.64		0.369		0.297308		0.0992063
Tb927.10.15140	166.65	165.94	143.92	216.17	180.55	184.17		0.374		0.285759		0.0914442
Tb927.10.15150	63.58	69.9	68.57	63.83	60.12	65.92		0.387		-0.0897004		2.88464e-05
Tb927.10.15160	20.2	20.37	19.8	43.17	51.31	53.63		0.344		1.29477		3.98547e-10
Tb927.10.15170	76.31	85.85	70.31	60.7	58.85	63.5		0.354		-0.344807		1.48925e-14
Tb927.10.15180	307.07	351.65	262.99	193.01	180.5	211.05		0.421		-0.656962		2.10446e-30
Tb927.10.15190	33.14	37.06	28.16	45.81	47.79	51.36		0.377		0.559511		0.828493
Tb927.10.1520	26.58	35.79	27.46	56.19	55.56	58.46		0.359		0.922047		0.00289617
Tb927.10.15200	34.17	41.49	30.71	80.33	75.27	76.63		0.363		1.12646		3.85771e-06
Tb927.10.15210	43.25	43.67	34.29	76.93	74.42	82.21		0.367		0.946284		0.0028887
Tb927.10.15220	150.91	142.8	131.11	72.85	62.59	66.06		0.361		-1.07607		9.92329e-40
Tb927.10.15230	60.25	68.25	57.03	76.59	69.44	72.46		0.393		0.235915		0.027525
Tb927.10.15280	30.86	28.73	24.92	36.45	42.45	41.73		0.33		0.513395		0.960166
Tb927.10.15290	31.39	36	30.9	27.91	39.3	44.51		0.336		0.184771		0.0376263
Tb927.10.1530	23.93	27.18	22.44	27.71	27.06	28.13		0.336		0.172647		0.010986
Tb927.10.15300	32.22	38.37	30.29	33.45	38	41.44		0.34		0.162278		0.00101672
Tb927.10.15310	27.51	31.7	26.24	6.57	17.51	17.6		0.343		-1.03573		7.41851e-15
Tb927.10.15320	96.64	103.49	97.8	104.66	96	113.28		0.306		0.0755155		0.000280353
Tb927.10.15330	65.99	65.09	53.45	47.69	60.08	70.88		0.35		-0.0467195		1.01311e-05
Tb927.10.15370	65.46	70.01	58.19	53.16	45.19	49.45		0.355		-0.38988		7.62628e-14
Tb927.10.15380	77.42	83.22	73.93	59.97	53.84	55.15		0.408		-0.473337		4.99449e-15
Tb927.10.1540	27.45	30.7	26.81	22.49	34.69	37.94		0.344		0.162965		0.0522884
Tb927.10.15410	1156.63	1239.1	949.55	95.25	94.56	102.25		0.381		-3.51779		3.59698e-292
Tb927.10.15420	30.02	33.45	25.87	40.61	41.96	38.18		0.382		0.434645		0.661971
Tb927.10.15430	28.17	34.88	26.36	50.03	48.04	52.1		0.351		0.748089		0.108436
Tb927.10.15440	21.76	25.57	21.46	42.77	45.3	48.7		0.345		0.991481		0.000690531
Tb927.10.15450	22.07	26.77	20.65	29.2	31.91	32.82		0.336		0.434781		0.663187
Tb927.10.15460	26.71	25.38	24.71	114.87	118.82	121.92		0.362		2.21112		1.41291e-43
Tb927.10.15470	36.72	42.29	31.62	64.38	59.19	58.38		0.325		0.717799		0.147129
Tb927.10.15480	36.04	40.92	30.66	89.34	84.48	94.23		0.336		1.31656		1.0675e-11
Tb927.10.15490	46.6	50.49	41.39	60.53	64.94	62.27		0.361		0.439058		0.580822
Tb927.10.1550	59.3	68.24	51.95	89.53	91.56	96.98		0.374		0.631545		0.391046
Tb927.10.15500	28.87	29.33	24.61	47.13	44.14	47.44		0.335		0.744195		0.267093
Tb927.10.15510	40.14	42.81	36.65	49.42	40.78	40.07		0.333		0.123287		0.00713713
Tb927.10.15520	72.42	76.64	67.08	79.85	84.46	81.21		0.38		0.183874		0.00289155
Tb927.10.15530	114.56	130.31	103.51	70.6	73.23	73.05		0.401		-0.683765		5.27886e-29
Tb927.10.15540	18.19	19.63	17.72	53.84	54.08	52.92		0.366		1.53403		3.6422e-18
Tb927.10.15550	29.89	35.52	28.04	73.01	82.04	86.65		0.334		1.37095		1.31826e-14
Tb927.10.15570	21.58	27.23	21.74	44.93	47.12	46.8		0.367		0.976809		0.0011663
Tb927.10.15580	59.43	63.45	53.08	92.69	77.63	94.32		0.384		0.588784		0.721626
Tb927.10.15590	80.1	84.09	70.36	210.19	179.38	201.24		0.399		1.3328		3.31322e-12
Tb927.10.1560	80.84	88.78	69.98	49.29	46.21	51.63		0.344		-0.703536		1.89673e-29
Tb927.10.15600	13.12	12.32	11.04	30.24	27.19	32.42		0.376		1.30041		3.62608e-07
Tb927.10.15640	30.47	33.59	27.11	48.4	54.17	57.64		0.368		0.813333		0.0268795
Tb927.10.15650	25.96	29.99	23.67	33.81	36.71	43.77		0.38		0.521496		1
Tb927.10.15660	29.29	32.13	25.89	31.68	33.6	37.32		0.384		0.232812		0.0245029
Tb927.10.15670	33.76	32.81	28.67	61.25	60.27	64.63		0.343		0.966826		0.000257003
Tb927.10.15680	25.03	26.88	25.14	47.8	63.95	68.82		0.346		1.22869		6.5301e-05
Tb927.10.15690	27.07	28.06	28.02	44.19	42.06	40.14		0.351		0.604094		0.752375
Tb927.10.15700	43.85	51.84	43.57	75.49	133.26	131.95		0.342		1.29072		0.0171147
Tb927.10.15710	27.43	25.65	23.95	31.7	28.97	27.7		0.383		0.198136		0.0179802
Tb927.10.15720	85.51	84.07	72.05	164.4	163.9	171.99		0.373		1.04997		1.52235e-06
Tb927.10.15730	29.75	34.68	29.02	49.8	75.22	83		0.355		1.15446		0.0130695
Tb927.10.15740	25.87	27.37	22.61	32.97	31.05	31.3		0.314		0.32963		0.220061
Tb927.10.15750	123.72	166.5	142.56	169.39	389.18	388.5		0.36		1.12984		0.202903
Tb927.10.15760	582.79	655.28	515.61	353.63	374.06	379.17		0.434		-0.663913		1.61287e-31
Tb927.10.15770	30.05	31.57	23.15	57.18	58.75	68.45		0.365		1.12106		4.47816e-06
Tb927.10.15780	25.73	28.02	24.18	58.74	61.85	70.24		0.357		1.29204		9.13892e-11
Tb927.10.15790	78.87	80.73	70.67	51.59	55.03	58.91		0.371		-0.476234		2.7842e-14
Tb927.10.1580	28.82	26.16	26.3	25.77	20.66	20.88		0.36		-0.27208		1.32753e-06
Tb927.10.15810	33.22	34.31	28.99	39.84	38.35	41.96		0.416		0.315937		0.291861
Tb927.10.15820	24.49	21.88	20.68	32.91	36.82	36.22		0.361		0.660074		0.504475
Tb927.10.15830	26.61	28.77	23.52	73.58	64.54	78.98		0.343		1.46026		3.03106e-10
Tb927.10.15840	19.82	23.66	19.72	36.62	42.24	43.85		0.344		0.957256		0.000930431
Tb927.10.15850	50.33	59.38	40.98	81.56	84.33	90.6		0.353		0.767319		0.0588074
Tb927.10.15860	33.96	33.74	33.04	57.86	44.68	52.72		0.42		0.62405		0.672883
Tb927.10.15870	38.5	45.1	41.6	71.67	82.24	80.36		0.414		0.903938		0.00785565
Tb927.10.15880	20.67	26.24	19.25	50.08	57.72	63.83		0.359		1.37527		3.41766e-12
Tb927.10.15890	26.55	27.3	21.95	34.9	36.91	37.52		0.344		0.52842		1
Tb927.10.1590	685.95	707.09	534.13	352.99	256.09	308.24		0.485		-1.07099		7.72892e-40
Tb927.10.15930	16.78	21.86	18.23	31	29.04	36.42		0.331		0.762263		0.126923
Tb927.10.15940	40.32	44.47	33.83	58.42	59.3	68		0.371		0.646782		0.411743
Tb927.10.15950	21.02	23.85	18.67	33.26	34.99	32.33		0.347		0.662606		0.509839
Tb927.10.15960	24.74	26.04	19.35	107.11	97.07	113.79		0.363		2.18079		3.78731e-39
Tb927.10.15970	12.2	10.99	10.23	17.84	26.19	26.26		0.327		1.07261		0.0109168
Tb927.10.160	33.78	37.45	31.12	46.49	41.05	36.34		0.319		0.275432		0.127695
Tb927.10.1600	13.53	15.15	13.1	21.33	19.23	23.46		0.339		0.61571		0.71317
Tb927.10.16020	29.66	32.68	34.29	60.99	59.23	62.39		0.332		0.918223		0.00969241
Tb927.10.16030	21.85	18.58	19.75	38.36	31.76	39.29		0.342		0.862389		0.0574608
Tb927.10.16040	16.39	18.04	16.16	36.04	37.73	35.29		0.321		1.1082		5.04617e-05
Tb927.10.16050	29.82	26.42	32.05	48.06	34.07	43.05		0.291		0.503682		0.955055
Tb927.10.16060	94.07	96.15	76.19	82.09	75.41	76.58		0.359		-0.186647		2.90353e-06
Tb927.10.16070	25.09	26.35	27.67	22.66	16.97	19.28		0.383		-0.425348		3.98077e-06
Tb927.10.16090	43.15	51.34	37.4	51.69	53.02	61.47		0.376		0.333412		0.151214
Tb927.10.1610	34.26	34.24	28.18	59.88	64.25	59.14		0.321		0.922681		0.00850446
Tb927.10.16100	124.31	136.79	111.08	126.05	135.66	139.09		0.381		0.106882		8.54644e-05
Tb927.10.16110	58.02	58.15	51.06	61.7	64.84	61.56		0.36		0.169666		0.00496715
Tb927.10.16120	198.87	225.1	193.19	163.04	167.91	176.64		0.377		-0.281981		1.21612e-14
Tb927.10.16160	22.03	17.02	18.34	30.49	29.92	26.05		0.312		0.591233		0.802309
Tb927.10.16170	40.86	41.32	39.42	57.4	67.79	67.71		0.378		0.66571		0.411521
Tb927.10.16180	17	16.33	13.99	21.67	27.71	28.59		0.311		0.720469		0.344455
Tb927.10.1620	47.91	53.58	45.51	55.56	59.21	62.81		0.318		0.272653		0.0316405
Tb927.10.1630	91.31	96.78	87.98	73.81	65.29	67.78		0.38		-0.41624		1.68394e-17
Tb927.10.1660	46.63	39.73	35.07	39.29	32.87	30.64		0.341		-0.240285		2.24038e-05
Tb927.10.1680	11.13	11.74	8.86	19.84	18.43	17.47		0.329		0.812865		0.189089
Tb927.10.1690	52.74	48	41.77	45.18	35.01	43.19		0.354		-0.207955		7.36507e-07
Tb927.10.170	209.1	230.17	182.73	139.77	142.2	150.6		0.379		-0.523981		3.01379e-22
Tb927.10.1700	20.15	17.49	16.86	41.06	43.12	40.56		0.314		1.1946		1.3437e-06
Tb927.10.1710	33.44	38.71	34.16	56.85	65	67.17		0.372		0.830262		0.0250904
Tb927.10.1720	38.71	37.19	32.01	28.13	29.53	29.12		0.376		-0.314394		4.17261e-10
Tb927.10.1730	28	26.46	22.72	36.91	31.18	34.55		0.331		0.411294		0.555918
Tb927.10.1740	24.72	27.64	23.86	33.3	29.64	31.9		0.379		0.315326		0.225144
Tb927.10.1750	29.1	33.6	28.68	55.93	58.08	63.41		0.372		0.957218		0.00225951
Tb927.10.180	211.55	216.29	200.62	96.92	74.89	83.31		0.372		-1.30064		7.89602e-57
Tb927.10.1800	22.64	24.44	24.25	49.52	42.63	39.11		0.35		0.879846		0.0524359
Tb927.10.1820	27.2	29.75	23.77	39.4	30.96	40.09		0.305		0.452395		0.786155
Tb927.10.1840	22.55	23.9	19.87	35.77	36.54	34.75		0.319		0.690904		0.305995
Tb927.10.1850	31.5	39.64	32.34	56.79	52.43	62.34		0.331		0.729361		0.164814
Tb927.10.1860	25.27	26.24	21.84	29.02	29.35	28.78		0.344		0.248704		0.0632273
Tb927.10.1870	23.13	26.51	25.35	35.55	29.69	29.91		0.362		0.343505		0.250526
Tb927.10.1880	73.21	77.65	68.57	72.35	56.16	69.37		0.364		-0.149135		3.63234e-06
Tb927.10.1890	38.57	43.05	35.98	50.85	56.97	61.99		0.352		0.530033		1
Tb927.10.1900	20.29	20.14	16.56	26.09	29.9	31.23		0.391		0.61395		0.586392
Tb927.10.1910	28.02	30.63	26.59	27.35	40.25	40.58		0.34		0.343831		0.284675
Tb927.10.1930	41.5	41.01	35.28	42.54	44.18	44.45		0.345		0.155221		0.00282079
Tb927.10.1940	27.83	32.72	26.2	27.28	33.6	31.13		0.341		0.0849269		0.00832846
Tb927.10.1950	21.17	22.29	20.71	25.34	26.36	25.15		0.31		0.260146		0.0717457
Tb927.10.1960	31.15	36.08	27.11	23.31	26.07	31.57		0.341		-0.220839		7.61682e-09
Tb927.10.1970	46.3	54.49	45.76	50.53	63.85	68.51		0.367		0.319583		0.0810003
Tb927.10.1980	39.4	42.48	37.84	55.09	60.34	61.44		0.34		0.563025		0.832228
Tb927.10.2000	22.26	25.07	21.89	38.57	37.22	38.1		0.317		0.71838		0.207397
Tb927.10.2030	20.33	25.2	20.84	33.83	32.51	34.28		0.342		0.600314		0.641708
Tb927.10.2040	34.47	36.18	32.08	40.13	43.14	46.4		0.343		0.335987		0.128595
Tb927.10.2050	32.47	40.31	30.09	30.02	32.46	34.55		0.311		-0.0843195		3.80338e-05
Tb927.10.2060	36.01	39.3	36.63	35.72	38.7	41.61		0.334		0.0517722		5.74538e-05
Tb927.10.2070	47.85	43.1	38.15	50.54	50.34	55.21		0.351		0.273889		0.100785
Tb927.10.2080	110.47	116.34	88.38	230.51	221.06	236.69		0.389		1.12673		1.20668e-07
Tb927.10.210	44.85	46.47	39.8	98.67	89.18	99.76		0.327		1.13323		7.40806e-07
Tb927.10.2120	27.9	25.46	27.27	25.28	25.53	31.46		0.259		0.0290497		0.0362906
Tb927.10.2130	19.18	19.07	20.08	38.3	38.31	39.32		0.341		0.990944		0.000377209
Tb927.10.2160	120.16	141.03	112.66	143.37	142.33	156.82		0.347		0.243283		0.0211124
Tb927.10.2180	15.67	16.19	14.3	30.41	27.26	31.55		0.345		0.950724		0.00568338
Tb927.10.2190	155.49	170.66	134.66	156.62	167.91	178.12		0.457		0.125382		0.000189036
Tb927.10.2200	28.56	33.51	29.7	42.83	39.83	41.47		0.382		0.435757		0.64007
Tb927.10.2210	32.87	35.69	32.78	36.51	40.87	43.82		0.342		0.258186		0.0268961
Tb927.10.2220	11.96	14.33	11.48	35.15	39.56	43.47		0.343		1.64567		7.41301e-20
Tb927.10.2230	24.3	26.47	22.29	37.81	38.45	42.8		0.373		0.704535		0.220558
Tb927.10.2240	227.4	275.18	201.82	222.5	224.71	248.95		0.401		-0.016976		2.44486e-07
Tb927.10.2250	47.08	55.75	43.55	79.35	76.71	81.59		0.359		0.69912		0.145556
Tb927.10.2260	44.76	58.6	40.29	52.26	53.96	53.44		0.352		0.152445		0.00544338
Tb927.10.2270	32.74	38.09	31.52	86.2	91.7	96.78		0.373		1.42424		3.43786e-17
Tb927.10.2280	18.99	20.17	15.68	32.29	29.64	31.22		0.337		0.764327		0.072562
Tb927.10.230	224.62	243.63	185.87	207.06	206.27	194.72		0.386		-0.105365		7.43417e-08
Tb927.10.2300	44.01	48.54	44.76	107.11	99.98	105.44		0.366		1.18656		9.05176e-07
Tb927.10.2310	37.95	38.52	33.78	33.52	30.49	30.7		0.347		-0.21919		6.63991e-08
Tb927.10.2320	26.09	25.93	22.55	34.67	34.52	30.91		0.32		0.424775		0.591419
Tb927.10.2330	31.76	35.47	30.77	87.47	89.22	104.23		0.348		1.51931		2.48056e-17
Tb927.10.2350	164.91	168.15	153.49	101.52	104.18	98.61		0.402		-0.677046		9.64238e-24
Tb927.10.2370	203.99	240.49	186.03	146.19	167.05	155.95		0.418		-0.426347		2.47672e-17
Tb927.10.2380	61.3	74.04	56.99	75.27	83.88	89.1		0.375		0.36821		0.207765
Tb927.10.2390	13.76	14.54	12.23	36.91	58.02	57.88		0.357		1.91468		1.03883e-06
Tb927.10.240	84.05	89.65	76.96	89.96	81.62	89.68		0.353		0.0597545		0.000185473
Tb927.10.2460	15.42	15.01	13.36	28.58	29.75	29.68		0.323		1.00707		0.000398843
Tb927.10.2470	71.68	83.47	60.55	122.73	126.42	141.62		0.383		0.857294		0.0039734
Tb927.10.2480	24.83	27.66	24.1	48.57	49.83	57.21		0.342		1.02271		2.33489e-05
Tb927.10.2490	42.88	47.89	43.56	50.95	48.54	51.35		0.398		0.167238		0.00151371
Tb927.10.250	21.62	22.93	16.39	31.2	30	31.06		0.335		0.598316		0.63977
Tb927.10.2500	11.86	13.33	10.62	31.72	25.89	27.13		0.353		1.24268		1.48101e-06
Tb927.10.2510	36.15	36.58	32.45	71.09	58.29	65.82		0.327		0.892093		0.00559478
Tb927.10.2520	27	27.32	21.72	59.46	64.86	61.34		0.356		1.28783		3.81399e-10
Tb927.10.2530	136.59	138.66	121.62	113.41	116.68	120.3		0.388		-0.179705		2.81597e-09
Tb927.10.2540	29.73	28.82	30.34	63.37	52.64	52.06		0.341		0.918969		0.0248279
Tb927.10.2550	27.35	26.78	26.39	23.58	20.21	22.53		0.345		-0.279903		1.0394e-07
Tb927.10.2560	454.7	452.89	430.18	89.54	84.11	87.92		0.337		-2.35456		1.59833e-153
Tb927.10.2570	51.59	58.74	48.17	127.54	144.93	152.92		0.353		1.4243		1.27223e-17
Tb927.10.2580	88.67	81.96	81.03	71.29	61.99	70.84		0.377		-0.302058		2.14035e-10
Tb927.10.2590	20.22	18.73	18.57	25.95	31.04	34.8		0.335		0.674273		0.361632
Tb927.10.2600	15.1	15.96	14.69	32.71	32.79	37.65		0.31		1.1729		6.18663e-06
Tb927.10.2610	21.48	23.97	19.65	69.71	69.47	80.93		0.392		1.7575		4.18565e-26
Tb927.10.2620	141.93	157.94	117.53	124.67	104.54	116.32		0.413		-0.27262		1.1071e-11
Tb927.10.2630	25.18	24.83	22.68	29.18	26.57	26.63		0.368		0.180537		0.0204821
Tb927.10.2640	80.08	89.63	71.98	192.1	210.55	216.2		0.401		1.35643		1.97245e-15
Tb927.10.2650	37.51	41.75	35.03	58.41	65.7	72.15		0.358		0.780067		0.0301381
Tb927.10.2660	57.45	64.21	47.11	59.74	66.54	66.18		0.375		0.1895		0.01403
Tb927.10.2670	68.98	52.85	61.09	89.86	96.17	86.54		0.39		0.575414		0.822296
Tb927.10.2680	47.4	55.1	41.29	85.69	82.48	87.4		0.352		0.829755		0.0115706
Tb927.10.2690	29.1	28.78	24.43	50.98	54.35	56.62		0.321		0.976409		0.000301813
Tb927.10.2700	57.2	64.9	47.9	42.52	47.27	52.09		0.347		-0.260864		4.53122e-11
Tb927.10.2720	37.87	45.07	33.79	47.07	50.53	53.37		0.382		0.371087		0.296934
Tb927.10.2730	127.99	149.34	114.87	137.37	145.84	161.84		0.376		0.182378		0.00517835
Tb927.10.2750	49.83	54.71	45.02	50.43	46.15	49.7		0.356		-0.0319918		3.18847e-06
Tb927.10.2760	31.75	36.67	31.54	85.14	85.64	88.56		0.339		1.37542		3.44814e-13
Tb927.10.2770	207.83	230.95	188.88	156.4	156.81	157.49		0.401		-0.415175		1.62112e-19
Tb927.10.2780	41.48	45.42	38.62	43.18	49.38	55.27		0.354		0.236022		0.00993444
Tb927.10.2790	26.18	26.79	24.22	36.09	36.74	41.78		0.344		0.570247		0.798756
Tb927.10.280	366.41	378.56	352.26	132.29	123.8	118.26		0.418		-1.55141		1.17964e-70
Tb927.10.2800	82.22	79.5	69.33	91.88	95.05	101.61		0.374		0.320566		0.179391
Tb927.10.2810	128.45	151.2	121.38	141.74	148.05	144.94		0.375		0.116409		0.000269691
Tb927.10.2830	29.78	28.1	24.08	37.11	25.72	30.25		0.346		0.183551		0.0954097
Tb927.10.2850	30.83	24.76	21.9	71.54	61.37	77.3		0.355		1.43975		6.26401e-10
Tb927.10.2860	32.92	35.62	29.52	32.78	31.12	38.18		0.329		0.0579636		0.000182438
Tb927.10.2870	33.41	33.58	29.01	46.43	47.97	56.91		0.349		0.656401		0.323983
Tb927.10.2880	47.83	53.67	45.95	57.06	80.91	83.53		0.356		0.587081		0.789613
Tb927.10.2890	1533.28	1582.83	1476.41	1610	1612.37	1670.44		0.419		0.0913773		1.87357e-05
Tb927.10.290	161.37	172.64	132.2	204.85	179.58	210.97		0.367		0.352879		0.198528
Tb927.10.2900	87.91	98.33	82.57	87.87	101.17	109.7		0.357		0.152304		0.000438569
Tb927.10.2910	51.67	57.79	43.93	65.96	68.63	79.57		0.353		0.481485		0.775917
Tb927.10.2930	34.69	42.45	32	44.43	53.82	59.37		0.356		0.530271		1
Tb927.10.2940	32.69	31.54	31.43	42.98	39.81	41.75		0.368		0.380621		0.275701
Tb927.10.2950	41.38	42.77	39.62	63.12	74.61	78.78		0.352		0.806772		0.0142678
Tb927.10.2960	30.67	33.17	27.22	44.37	47.15	53.28		0.35		0.669172		0.284013
Tb927.10.2970	263.98	266.05	229.11	96.18	81.81	85.97		0.486		-1.52405		3.17221e-84
Tb927.10.2990	40.46	43.03	37.15	92.97	96.21	100.56		0.319		1.26405		1.58414e-11
Tb927.10.300	16.7	16.16	14.83	48.66	41.92	48.12		0.315		1.54021		4.568e-08
Tb927.10.3000	49.54	58.68	47.32	108.93	122.8	131.62		0.349		1.22407		9.13892e-11
Tb927.10.3010	57.06	66.03	55.41	128.5	146.8	161.91		0.354		1.2924		2.80602e-13
Tb927.10.3020	31.25	34.33	29.56	88.94	89.31	94.38		0.352		1.51882		4.56716e-20
Tb927.10.3040	185.04	177.43	156.73	88.21	76.71	75.4		0.337		-1.11133		9.0286e-43
Tb927.10.3070	20.61	19.58	18	38.09	34.31	34.86		0.336		0.882269		0.00606229
Tb927.10.3080	28.9	30.98	25.58	51.82	49.31	45.45		0.311		0.778367		0.096139
Tb927.10.3090	22.48	24.08	19.85	45.68	49.23	50.17		0.352		1.12738		1.62202e-06
Tb927.10.310	72.8	82.33	67.61	79.62	94.6	99.63		0.367		0.298025		0.0451433
Tb927.10.3100	27.99	27.49	23.68	38.45	41.18	40.87		0.352		0.60619		0.608702
Tb927.10.3110	23.98	27.45	21.6	33.6	30.07	31.8		0.359		0.386558		0.430554
Tb927.10.3120	72.5	65.65	51.45	97.41	78.11	88.26		0.36		0.476376		0.869173
Tb927.10.3130	42.99	44.97	43.25	50.76	46.51	50.74		0.338		0.173817		0.00354094
Tb927.10.3140	24.51	30.15	23.16	38.4	37.56	37.34		0.347		0.541935		0.917628
Tb927.10.3150	27.62	23.74	21.16	24.77	33.1	24.77		0.362		0.188461		0.196396
Tb927.10.3160	97.68	117.43	99.6	127.49	115.54	118.63		0.359		0.200611		0.0284182
Tb927.10.3170	59.77	68.15	55.28	69.41	72.39	74.07		0.381		0.236743		0.0166559
Tb927.10.3180	19.17	21.09	18.16	17.75	17.81	20.73		0.314		-0.0535837		0.00107311
Tb927.10.320	39.24	36.64	30.33	76.32	76.91	66.59		0.315		1.0494		0.00410262
Tb927.10.3200	142.81	170.7	128.51	170.86	168.31	176.86		0.349		0.223343		0.00824638
Tb927.10.3210	344.75	377.1	304.25	188.36	191.17	204.93		0.398		-0.811995		1.19302e-39
Tb927.10.3230	54.82	58.99	55	56.11	54.29	54.11		0.345		-0.0372251		6.02166e-06
Tb927.10.3250	53.54	57.58	53.24	60.56	57.53	55.9		0.351		0.0821452		0.00146636
Tb927.10.3270	58.23	60.8	40.7	36.54	25.29	37.85		0.354		-0.680259		9.0293e-09
Tb927.10.3290	28.85	27.68	22.77	35.37	36.32	33.54		0.321		0.408153		0.570814
Tb927.10.330	25.82	23.65	20.09	47.58	45.04	42.07		0.319		0.953313		0.00417937
Tb927.10.3300	28.65	31.64	26.3	15.86	14.76	19.98		0.311		-0.775063		3.86701e-18
Tb927.10.3310	42.18	45.72	36.01	49.58	56.72	59.97		0.376		0.424235		0.466534
Tb927.10.3320	42.82	41.76	36.28	35.1	31.09	31.76		0.328		-0.303219		1.99976e-10
Tb927.10.3330	47.86	51.03	46.28	87.43	92.01	97.47		0.375		0.931674		0.00186757
Tb927.10.3340	21.89	23.87	18.88	22.1	25.81	29.83		0.349		0.26623		0.0343322
Tb927.10.3350	33.17	32.67	30.4	72.86	70.12	76.59		0.342		1.18997		2.08454e-09
Tb927.10.3360	17.11	19.44	15.81	35.51	59.3	71.32		0.328		1.66578		0.0026949
Tb927.10.3390	32.61	35.13	28.66	39.57	46.58	49.84		0.324		0.496396		0.853183
Tb927.10.340	41.21	38.18	33.88	38.92	43.62	43.28		0.367		0.151595		0.0295893
Tb927.10.3400	21.23	26.02	20.41	11.27	47.27	49.64		0.346		0.677059		0.859676
Tb927.10.3430	35.98	42.12	32.35	36.83	37.57	39.5		0.337		0.0443743		0.00025826
Tb927.10.3470	29.04	28.88	25.73	43.51	46.76	53.28		0.336		0.779116		0.0575057
Tb927.10.3480	25.94	25.73	24.09	41.14	43.52	45.29		0.331		0.778448		0.0669576
Tb927.10.3490	25.39	24.41	21.62	56.76	58.15	58.64		0.342		1.28095		4.54662e-10
Tb927.10.3500	56.5	64.62	51.95	61.7	68.3	75.28		0.362		0.246237		0.0155116
Tb927.10.3510	39.75	43.29	36.34	31.6	44.48	44.59		0.336		0.0155059		2.0343e-05
Tb927.10.3520	56.23	58.98	53.23	78.59	71.74	78.28		0.394		0.440654		0.539946
Tb927.10.3540	76.16	83.73	65.75	82.62	70.25	79.98		0.377		0.045378		2.79668e-05
Tb927.10.3550	17.74	17.52	16.93	24.5	29.19	30.49		0.333		0.689704		0.261368
Tb927.10.3560	107.12	112.9	88.09	76.48	80.04	81.79		0.35		-0.370606		1.83217e-16
Tb927.10.3580	56.4	62.77	43.82	74.35	61.69	70.67		0.376		0.342825		0.253484
Tb927.10.3590	30.56	30.36	27.22	54.48	49.3	50.42		0.354		0.806934		0.0320061
Tb927.10.360	38.06	37.87	31.46	56	47.51	56.7		0.355		0.577105		0.769931
Tb927.10.3610	32.43	35.17	29.55	34.92	37.84	33.06		0.346		0.123326		0.00416419
Tb927.10.3630	27.56	29.69	25.03	45.59	42.77	46.28		0.346		0.710493		0.151187
Tb927.10.3640	102.88	106	87.59	85.12	81.65	82.59		0.339		-0.249656		3.31998e-12
Tb927.10.3660	48.78	54.24	45.72	220.72	244.41	253.14		0.374		2.27173		3.02779e-56
Tb927.10.3670	29.78	32.15	26.64	67.46	67.54	71.72		0.368		1.22279		6.41217e-09
Tb927.10.3690	17.65	20.44	17.93	23.99	22.1	28.17		0.337		0.406643		0.534537
Tb927.10.370	26.28	36.66	27.77	48.65	38.83	39.93		0.323		0.490145		0.99098
Tb927.10.3700	29.22	33.89	31.18	26.51	35.27	42.09		0.324		0.139602		0.0226267
Tb927.10.3710	196.36	196.63	170.38	222.3	202.15	218.79		0.399		0.191274		0.00464035
Tb927.10.3720	24.23	30.86	25.56	41.4	38.19	43.14		0.344		0.605742		0.621447
Tb927.10.3730	29.37	32.32	26.93	62.21	60.08	62.88		0.377		1.06315		1.08734e-05
Tb927.10.3740	14.87	13.33	13.94	21.73	25.39	19.84		0.315		0.668109		0.492764
Tb927.10.3750	11.02	13.02	9.85	37.61	38.36	43.8		0.331		1.82134		6.5993e-24
Tb927.10.3760	68.47	69.88	56.02	128.87	106.47	119.17		0.388		0.867021		0.004951
Tb927.10.3770	42.38	47.37	36.9	45.27	42.28	43.63		0.379		0.0507007		0.000110166
Tb927.10.3780	28.86	33.42	29.19	45.27	59.89	61.81		0.336		0.868218		0.0228925
Tb927.10.3790	37.84	43.09	36.32	30.17	43.3	43.83		0.344		0.000615091		6.34218e-05
Tb927.10.380	31.87	34.5	28.54	28.52	31.41	29.12		0.397		-0.0919445		2.58161e-05
Tb927.10.3800	13.55	15.31	12.06	50.94	53.33	57.22		0.307		1.98057		7.39247e-34
Tb927.10.3810	44.74	49.08	39.24	30.82	32.33	30.5		0.35		-0.506726		2.24436e-15
Tb927.10.3820	39.22	43.31	38.35	55.39	69.38	70.09		0.338		0.688862		0.177179
Tb927.10.3850	35.42	42.52	28.86	40.87	39.51	45.73		0.329		0.239771		0.0415842
Tb927.10.3860	40.65	39.71	40.25	63.61	69.37	68.5		0.398		0.740287		0.19299
Tb927.10.3870	20.61	22.46	18.69	29.87	40.98	42.22		0.342		0.872472		0.0352521
Tb927.10.3880	33.1	35.24	30.61	72.95	73	83.59		0.331		1.21397		5.24559e-09
Tb927.10.3890	36.87	38.93	32.45	39.86	48.17	51.07		0.344		0.361755		0.203743
Tb927.10.390	45.67	51.21	41.23	120.53	117.1	120.68		0.369		1.37539		3.29503e-14
Tb927.10.3900	45	48.58	42.36	36.88	47.11	52.55		0.364		0.00635363		2.35956e-06
Tb927.10.3910	16.87	17.12	11.9	51.47	45.76	58.72		0.3		1.76483		1.82814e-17
Tb927.10.3920	33.64	37.84	33.81	53.58	61.74	64.85		0.392		0.77499		0.0561041
Tb927.10.3950	30.62	31.22	28.86	27.12	23.72	27.99		0.315		-0.202358		6.187e-07
Tb927.10.3960	63.79	62.81	65.4	70.34	64.29	62.52		0.395		0.0381874		0.000121789
Tb927.10.3970	31.79	30.22	30.73	35.69	32.03	33.26		0.34		0.122806		0.000485644
Tb927.10.3990	328.84	352.41	290.83	397.41	416.23	457.47		0.415		0.386942		0.228508
Tb927.10.400	23.89	23.43	19.66	18.68	18.06	20.27		0.318		-0.232515		2.97982e-06
Tb927.10.4000	79.61	94.4	75.14	68.72	72.78	75.12		0.344		-0.201848		4.15301e-09
Tb927.10.4010	33.05	34.85	30.66	40.01	41.76	44.7		0.333		0.359721		0.237995
Tb927.10.4040	90.37	98.31	73.05	73.06	67.47	79.22		0.322		-0.252216		5.67102e-11
Tb927.10.4050	58.72	64.52	60.1	37.69	62.21	65.36		0.369		-0.149784		0.000198959
Tb927.10.4060	40.56	50.46	37.29	76.52	81.98	84.61		0.376		0.921976		0.00147954
Tb927.10.4070	42.4	50.5	41.98	50.84	51.96	48.35		0.368		0.164305		0.0155097
Tb927.10.410	26.17	26.92	24.07	42.89	47	49.19		0.323		0.84999		0.0262497
Tb927.10.4100	16.33	16.16	15.09	32.3	38.45	36.99		0.335		1.17913		8.06547e-07
Tb927.10.4130	64.06	70.47	58.56	61.67	57.87	60.81		0.413		-0.098474		8.95702e-08
Tb927.10.4170	29.34	31.21	26.59	45.28	56.42	62.07		0.353		0.910264		0.00303889
Tb927.10.420	18.4	19.19	15.52	37.02	36	43.24		0.324		1.1303		2.71594e-06
Tb927.10.4200	38.29	36.19	31.5	58.92	56.32	63.06		0.363		0.750515		0.0784084
Tb927.10.4210	26.97	34.73	30.75	52.47	54.55	49.18		0.334		0.756649		0.147502
Tb927.10.4220	46.87	50.62	45.84	67.94	60.49	70.51		0.348		0.472993		0.794597
Tb927.10.4230	24.51	21.23	23.45	32.2	35.69	34.94		0.322		0.571626		0.901415
Tb927.10.4240	510.45	515.86	421.31	165.76	160.71	155.49		0.392		-1.5867		4.35989e-70
Tb927.10.4250	50.5	46.42	45.33	102.2	72.56	75.64		0.353		0.815806		0.25158
Tb927.10.4270	32.27	34.23	27.36	56.96	46.41	47.9		0.4		0.688544		0.319472
Tb927.10.4280	505.94	530.1	413.88	45.31	36.9	43.77		0.424		-3.52471		2.50296e-241
Tb927.10.4290	56.27	59.63	45.55	71.47	64.25	68.52		0.386		0.339178		0.277033
Tb927.10.430	67.9	59.69	50.04	63.38	48.27	49.67		0.346		-0.13895		0.000365982
Tb927.10.440	25.01	25.19	21.24	36.73	28.83	30.91		0.374		0.433348		0.706007
Tb927.10.4400	13.84	14.03	12.72	38.12	27.7	30.81		0.38		1.25135		0.0121142
Tb927.10.450	126.82	149.25	113.92	212.21	249.33	279.04		0.415		0.925218		0.000394373
Tb927.10.4530	16.56	16.68	13.81	18.23	18.43	20.02		0.324		0.268645		0.263754
Tb927.10.4540	20.64	12.11	20.4	13.36	21.01	15.13		0.365		-0.102641		0.148341
Tb927.10.4550	25.38	24.31	27.36	39.92	34.68	38.58		0.351		0.554752		0.948254
Tb927.10.4580	51.46	55.37	42.1	75.69	73.02	81.83		0.389		0.630383		0.46176
Tb927.10.4590	45.62	50.44	46.58	47.83	36.06	44.84		0.329		-0.14803		3.00408e-05
Tb927.10.4600	31.69	35.22	30.7	41.41	40.97	42.01		0.351		0.34977		0.214015
Tb927.10.4610	47.73	51.04	48.84	77.09	68.13	70.28		0.34		0.545897		0.925379
Tb927.10.4620	175.83	164.69	185.91	154.04	159.23	131.99		0.407		-0.241594		0.000137145
Tb927.10.4630	34.65	35.62	27.75	42.91	46.81	41.51		0.326		0.42095		0.636849
Tb927.10.4640	160.31	176.35	131.45	94.89	96.47	100.16		0.382		-0.683253		3.15894e-28
Tb927.10.4650	17.08	18.75	15.56	41.14	41.12	48.19		0.315		1.34394		4.10858e-10
Tb927.10.4660	54.2	49.28	42.4	63.23	47.59	53.19		0.332		0.169002		0.0794362
Tb927.10.4670	30.98	28.09	26.35	72.34	72.31	74.37		0.361		1.35842		2.10768e-09
Tb927.10.4680	33.99	40.19	28.99	67.98	63.42	61.84		0.34		0.90537		0.0108365
Tb927.10.4690	160.49	156.7	138.64	176.54	133.67	149.45		0.458		0.0120712		0.000112094
Tb927.10.470	41.77	40.59	38.08	28.05	30.78	32.93		0.348		-0.392377		4.36113e-13
Tb927.10.4700	29.56	26.74	28.78	32.59	31.05	32.37		0.316		0.174365		0.0440551
Tb927.10.4710	169.41	175.3	132.58	184.83	165.04	170.44		0.394		0.124505		0.000709393
Tb927.10.4720	17.88	20.24	16.95	39.15	37.83	36.67		0.33		1.04526		0.00017942
Tb927.10.4730	29.51	29.23	26.82	45.8	45.87	48.62		0.352		0.713404		0.21848
Tb927.10.4750	68.19	69.61	61.73	78.46	93.37	95.9		0.323		0.424173		0.409007
Tb927.10.4760	79.14	89.41	70.36	120.8	102.72	105.17		0.415		0.46026		0.753116
Tb927.10.4770	38.12	38.47	36.97	185.88	172.52	180.54		0.37		2.24667		3.19004e-52
Tb927.10.4780	16.32	15.13	14.95	93.15	92.5	106.49		0.342		2.65446		1.3724e-72
Tb927.10.4790	49.05	49.11	48.98	83.78	56.27	56.8		0.374		0.419907		0.78927
Tb927.10.480	10.4	11.67	8.97	6.66	21.38	20.06		0.371		0.631908		0.890414
Tb927.10.4800	21.46	21.22	16.71	40.66	47.5	45.96		0.338		1.17523		2.64611e-06
Tb927.10.4810	46.23	49.55	35.13	37.8	37.3	45.51		0.377		-0.118226		5.54197e-05
Tb927.10.4820	31.24	32.19	26.84	59.2	61.72	58.39		0.328		0.990137		0.0019603
Tb927.10.4830	147.61	158.4	126.17	171.15	166.09	167.79		0.361		0.224737		0.0177643
Tb927.10.4840	71.43	86.98	69.34	123.53	125.99	124.32		0.367		0.71497		0.147532
Tb927.10.4850	64.96	69.47	64.73	99.45	98.12	101.24		0.343		0.585301		0.698133
Tb927.10.4860	17.33	23.7	19.37	39.05	32.68	41.51		0.334		0.906763		0.0206382
Tb927.10.4870	29.76	31.89	27.95	52.15	51.87	51.83		0.345		0.798588		0.0362622
Tb927.10.4880	370.84	376.75	339.52	95.35	76.95	87.82		0.428		-2.06325		3.75817e-115
Tb927.10.4890	79.31	85.02	66.41	128.49	121.81	138.51		0.364		0.752797		0.0539058
Tb927.10.4900	70.4	78.26	60.85	121.53	127.82	125.42		0.375		0.838986		0.00740885
Tb927.10.4910	22.49	23.13	21.89	38.14	34.32	38.21		0.337		0.713091		0.186347
Tb927.10.4920	30.69	29.16	25.54	54.75	44.16	46.95		0.367		0.772445		0.100196
Tb927.10.4930	21.19	23.65	16.66	46.22	45.24	39.54		0.339		1.09091		0.00101965
Tb927.10.4950	64.38	58	51.02	109.63	87.17	90.3		0.345		0.727449		0.249359
Tb927.10.4970	64.34	64.69	55.97	67.62	61.37	65.44		0.338		0.0717256		0.00667838
Tb927.10.4980	133.44	137.28	109.54	213.14	192.55	200.26		0.406		0.672213		0.223251
Tb927.10.5000	66.78	70.32	55.11	111.34	92.85	98.78		0.377		0.656492		0.345429
Tb927.10.5010	101.83	108.64	92.72	64.86	61.4	64.97		0.383		-0.664913		4.31501e-30
Tb927.10.5020	71.86	79.51	69.8	105.03	93.56	102.04		0.371		0.442833		0.590018
Tb927.10.5040	55.87	59.73	55.66	90.46	89.75	97.93		0.383		0.699623		0.208927
Tb927.10.5060	70.35	77.52	61.97	118.82	128.79	137.34		0.382		0.875381		0.00994452
Tb927.10.5070	52.99	60.15	50.85	72.99	66.99	71.5		0.371		0.366913		0.263181
Tb927.10.5080	42.74	41.83	39.16	81.49	74.83	81.22		0.344		0.940975		0.000859502
Tb927.10.5090	136.7	156.44	131.03	27.67	76.96	78.42		0.343		-1.2124		7.18835e-20
Tb927.10.510	51.49	56.18	43.41	36.23	36.18	40.9		0.34		-0.415037		1.98865e-11
Tb927.10.5110	61.86	65.31	57.49	52.28	54.89	64.26		0.315		-0.107252		5.38423e-05
Tb927.10.5120	78.47	97.33	74.94	105.58	101.25	103.8		0.349		0.309005		0.139748
Tb927.10.5130	32.25	42.95	31.39	74.23	67.16	76.11		0.347		1.02894		0.000206648
Tb927.10.5150	10.31	10.11	11.19	15.95	22.42	22.49		0.374		0.945113		0.050151
Tb927.10.5170	50.01	56.13	46.39	52.57	75.31	73.82		0.365		0.403118		0.464069
Tb927.10.5180	46.06	49.66	41.09	51.45	64.09	67.56		0.353		0.420458		0.40303
Tb927.10.520	333.08	365.7	285.87	147.17	162.49	157.85		0.384		-1.07461		7.66325e-52
Tb927.10.5200	41.93	45.2	40.75	40.05	36.97	42.6		0.367		-0.096332		8.89372e-08
Tb927.10.5210	18.84	21.75	16.27	32.13	32.35	31.51		0.329		0.75547		0.0897706
Tb927.10.5220	74.88	80.8	70.38	40.1	35.23	35.71		0.334		-1.02563		1.12581e-39
Tb927.10.5230	74.47	72.32	55.29	98.62	86.03	90.36		0.384		0.444558		0.641838
Tb927.10.5240	35.51	39.86	35.87	51.63	63.5	67.81		0.351		0.717695		0.118635
Tb927.10.5250	22.41	27.34	20.12	20.6	73.89	75.36		0.353		1.28152		0.272022
Tb927.10.5260	17.25	20.06	16.85	27.45	31.12	32.94		0.35		0.756702		0.0902941
Tb927.10.5270	21.41	21.07	19.76	28.8	26.15	29.38		0.347		0.438204		0.659561
Tb927.10.5300	119.8	129.84	117.03	66.31	51.65	65.97		0.374		-0.995325		8.70013e-33
Tb927.10.5310	28.79	32.58	29.52	22.72	39.01	50.33		0.353		0.302078		0.475965
Tb927.10.5380	49.72	53.87	43.87	86.9	95.95	100.3		0.37		0.941243		0.000130378
Tb927.10.5390	27.59	28.52	26.01	71.79	74.2	81.7		0.333		1.47127		3.83437e-18
Tb927.10.540	260.15	300.64	239.29	249.04	283.38	287		0.396		0.0344588		2.28443e-06
Tb927.10.5400	41.4	50.93	40.81	79.54	93.05	98.5		0.353		1.02583		3.66515e-05
Tb927.10.5420	26.68	26.88	25.44	25.72	24.4	27.65		0.319		-0.0226389		2.71855e-06
Tb927.10.5430	68.83	66.7	55.29	73.91	71.03	80.11		0.362		0.238033		0.0320061
Tb927.10.5450	38.91	42.52	37.52	48.25	55.3	60.05		0.38		0.459817		0.617281
Tb927.10.5470	24.6	27.82	26.23	55.23	56.39	59.75		0.333		1.1236		3.02487e-06
Tb927.10.5490	23	28.66	26.75	58.13	54.88	60.05		0.357		1.14216		8.71144e-06
Tb927.10.550	29.91	29.89	24.34	34.12	34.21	35.49		0.34		0.303221		0.106476
Tb927.10.5500	56.21	58.85	51.98	52.73	52.31	52.59		0.387		-0.0836515		4.63483e-07
Tb927.10.5510	14.88	18.03	12.9	49.1	49.01	50.93		0.354		1.70197		5.672e-22
Tb927.10.5520	54.72	53.1	50.45	80.2	74.75	76		0.377		0.545193		0.930513
Tb927.10.5530	28.42	29.71	28.09	36.47	32.57	35.18		0.362		0.273538		0.055599
Tb927.10.5540	48.73	48.96	36.45	57.7	53.43	54.54		0.312		0.304573		0.130564
Tb927.10.5550	197.19	216.23	179.33	167.88	154.33	174.07		0.37		-0.256269		5.29386e-11
Tb927.10.5560	34.12	33.74	29.9	37.45	36.23	39.69		0.327		0.213723		0.0202748
Tb927.10.5570	34.21	31.55	33.2	48.39	41.38	49.95		0.34		0.497621		0.903695
Tb927.10.5580	38.83	38.06	28.31	50	52.03	56.7		0.342		0.59344		0.646382
Tb927.10.5590	29.82	30.88	26.72	33.61	30.46	36.24		0.333		0.19843		0.0221152
Tb927.10.5600	18.11	17.91	15.38	23.19	25.32	27.46		0.335		0.563661		0.862929
Tb927.10.5620	1035.09	1181.98	919.44	3504.67	3445.34	3762.02		0.423		1.772		1.02412e-36
Tb927.10.5630	106.79	107.45	92.53	114.31	88.98	101.55		0.353		-0.00910518		8.74509e-05
Tb927.10.5640	38.37	36.15	33.72	51.07	49.91	48.92		0.333		0.469767		0.720992
Tb927.10.5650	39	42.57	33.22	67.66	59.93	65.05		0.361		0.74691		0.119146
Tb927.10.5660	37.13	41.89	33.43	34.16	30.86	31.36		0.367		-0.222478		2.53003e-08
Tb927.10.5670	112.31	123.69	101.4	52.74	67.22	61.3		0.4		-0.896399		1.47127e-39
Tb927.10.570	24.53	25.32	22.2	45.99	55.16	56.84		0.334		1.13276		5.2656e-08
Tb927.10.5740	21.51	22.47	16.85	33.73	28.94	24.22		0.359		0.514407		1
Tb927.10.5760	144.98	159.13	121.28	63.46	63.75	66.89		0.391		-1.13199		3.62908e-53
Tb927.10.5790	42.05	44.31	37.23	50.06	56.74	54.41		0.366		0.383379		0.324219
Tb927.10.580	47.45	48.32	35.64	55.66	53.36	55.76		0.348		0.326466		0.241962
Tb927.10.5800	50.45	46.68	48.11	49.39	44.04	57.82		0.316		0.0584963		0.0604504
Tb927.10.5810	111.97	120.33	94.59	486	537.14	547.98		0.441		2.26492		1.47829e-64
Tb927.10.5820	30.44	34.77	28.06	80.12	92.11	89.56		0.32		1.48892		5.79996e-18
Tb927.10.5830	56.01	59.36	47.71	70.56	70.66	69.36		0.35		0.368789		0.249952
Tb927.10.5860	90.58	93.17	82.03	104.47	97.7	114.61		0.424		0.253249		0.0399545
Tb927.10.5870	26.77	28.23	23.95	33.17	33.13	39.75		0.37		0.425733		0.526596
Tb927.10.5890	31.77	34.86	27.98	38.27	42.17	42.95		0.345		0.383161		0.309748
Tb927.10.590	30.99	32.47	26.2	38.89	41.71	44.67		0.319		0.482505		0.802012
Tb927.10.5900	47.36	54	47.82	91.31	82.64	82.85		0.35		0.783591		0.0441739
Tb927.10.5910	25.05	27.06	23.69	31.77	31.75	35.76		0.324		0.389305		0.313427
Tb927.10.5920	31.19	36.48	30.78	34.79	32.92	32.1		0.353		0.0197932		3.98467e-05
Tb927.10.5960	17.78	20.85	19.1	21.19	47.18	47.95		0.315		1.01071		0.283083
Tb927.10.5970	19.77	20.76	19.37	32.76	35.91	34.87		0.324		0.78956		0.058721
Tb927.10.5980	38.75	38.99	36.37	39.83	35.85	42.2		0.326		0.0468937		0.000117056
Tb927.10.5990	37.75	40.07	34.61	51.21	50.16	54.88		0.367		0.474829		0.769931
Tb927.10.600	48.79	51.28	40.76	43.69	47.05	46.28		0.385		-0.0395682		4.38927e-06
Tb927.10.6000	22.21	24.02	20.72	26.33	38.56	44.87		0.351		0.713196		0.478209
Tb927.10.6010	39.03	43.33	35.32	53.55	58.89	68.23		0.345		0.618488		0.498649
Tb927.10.6020	67.92	77.36	58.03	88.75	82.93	81.93		0.405		0.31893		0.208205
Tb927.10.6030	113.91	131.53	98.57	124.68	115.62	119.66		0.41		0.0653861		8.49758e-05
Tb927.10.6050	163.29	196.77	153.08	354.41	566.7	587.71		0.405		1.556		0.000319446
Tb927.10.6080	157.96	179.62	145.65	179.4	170.4	166.02		0.371		0.0941577		0.000156324
Tb927.10.6090	46.27	47.91	37.94	53.88	48.39	56.64		0.346		0.266361		0.043001
Tb927.10.610	21.86	25.37	22.46	18.47	35.82	43.11		0.373		0.48297		0.915648
Tb927.10.6100	31.63	35.55	29.28	43.83	39.65	46.84		0.327		0.434056		0.598268
Tb927.10.6110	37.75	40.13	32.67	50.15	50.48	53.4		0.353		0.478512		0.790405
Tb927.10.6120	50.49	54.32	42.76	59.24	56.9	57.48		0.357		0.234534		0.063786
Tb927.10.6140	17.12	18.12	18.61	40.66	44.23	45.03		0.346		1.27061		8.62514e-07
Tb927.10.6150	27.66	30.32	27.11	38.6	59.95	64.4		0.329		0.937368		0.107276
Tb927.10.6160	27.26	29.26	22.7	36.11	41.11	45.03		0.359		0.625898		0.502292
Tb927.10.6170	20.15	21.99	17.73	28.29	31.44	33.88		0.32		0.644829		0.383367
Tb927.10.6180	50.98	58.37	45.54	50.98	58.35	63.92		0.357		0.161611		0.00220158
Tb927.10.6190	49.86	51.71	46.57	46.34	37.78	46.21		0.351		-0.184792		1.5405e-08
Tb927.10.620	46.74	51.49	39.69	44.25	56.56	62.04		0.354		0.239712		0.0345991
Tb927.10.6200	178.84	184.11	179.79	20.9	19.29	23.94		0.337		-3.08119		2.01843e-131
Tb927.10.6210	42.56	46.49	38.01	40.13	54.27	54.46		0.348		0.228446		0.0215243
Tb927.10.6220	47.67	45.39	40.64	41.39	40.12	44.2		0.361		-0.0889		1.31877e-07
Tb927.10.6230	44.26	48.98	41.75	56.71	63.28	65.69		0.358		0.459966		0.641708
Tb927.10.6240	76.31	77.74	72.62	113.29	114.55	121.98		0.328		0.626019		0.48978
Tb927.10.6250	21	25.7	24.73	50.28	42	49.49		0.331		0.98895		0.00122476
Tb927.10.6260	64.57	65.65	61.38	54.91	56.11	57.45		0.364		-0.185606		5.13279e-10
Tb927.10.6280	45.93	51.12	49	53.6	46.09	46.55		0.34		0.00187562		0.00157284
Tb927.10.6290	86.84	97.39	79.93	93.06	98.8	116.35		0.384		0.222502		0.0118522
Tb927.10.630	23.61	26.62	23.3	42.35	44.77	43.09		0.347		0.824435		0.0294735
Tb927.10.6300	52.67	55.47	41.89	33.75	31.1	34.93		0.388		-0.588428		1.71754e-16
Tb927.10.6320	29.97	33.53	25.97	29.35	28.18	24.35		0.359		-0.127893		3.06343e-06
Tb927.10.6330	54.45	60.04	48.74	65.19	79.09	82.65		0.329		0.475341		0.70572
Tb927.10.6340	45.71	50.49	39.49	57.54	49.25	53.33		0.358		0.238839		0.0364355
Tb927.10.6350	76.23	81	69.54	125.26	121.39	137.59		0.403		0.760778		0.0585663
Tb927.10.6360	36.95	40.62	37.78	46.44	52.18	55.37		0.341		0.416819		0.485592
Tb927.10.6380	51.86	49.39	51.78	58.82	54.53	54.38		0.289		0.132326		0.00217878
Tb927.10.6390	70.6	59.93	55.56	145.2	123.53	130.38		0.315		1.10079		4.73668e-05
Tb927.10.640	38.12	38.06	33.3	36.68	32.05	39.42		0.335		-0.0176337		8.13323e-06
Tb927.10.6410	40.58	42.15	33.29	70.9	74.2	78.29		0.348		0.945191		0.000120311
Tb927.10.6440	67.12	67.38	50.49	64.59	58.08	57.23		0.382		-0.0402521		9.90713e-05
Tb927.10.6450	29.41	32.26	25.23	56.94	42.28	39.82		0.321		0.678072		0.537119
Tb927.10.6480	35.47	38.4	31.53	70.74	66.74	73.71		0.343		1.00267		0.000233854
Tb927.10.6490	158.04	170.52	149.61	209.81	176.99	185.12		0.397		0.25829		0.0292553
Tb927.10.650	67.1	70.94	47.08	73.21	75.97	77.53		0.431		0.292387		0.127701
Tb927.10.6520	21.48	24.13	17.96	23.1	21.5	23.93		0.292		0.10839		0.00842003
Tb927.10.6530	37.24	34.39	30.65	43.7	39.55	40.86		0.308		0.279095		0.103776
Tb927.10.6540	20.71	22.2	19.01	31.39	35.82	36.31		0.343		0.741432		0.114523
Tb927.10.6550	38.04	42.19	36.64	86.9	77.55	77.38		0.371		1.04909		1.83357e-05
Tb927.10.6560	14.45	14.85	15.11	27.89	25.09	29.63		0.356		0.895432		0.0150951
Tb927.10.6570	40.43	42.53	38.35	68.12	70.85	73.56		0.361		0.808968		0.0177056
Tb927.10.6590	24.18	24.03	22.23	38.64	38.66	43.21		0.332		0.774686		0.0584249
Tb927.10.660	99.36	101.92	96.5	46.34	45.98	46.7		0.359		-1.09895		2.96401e-41
Tb927.10.6600	35.18	40.88	33.7	47.2	46.43	55.04		0.38		0.437761		0.583293
Tb927.10.6610	102.71	113.97	87.06	180.63	176.36	188.84		0.378		0.845615		0.00548118
Tb927.10.6620	21.92	21.28	19.29	39.29	37.9	40.68		0.34		0.915499		0.00248664
Tb927.10.6640	110.94	115.7	98.08	171.34	152.79	162.14		0.378		0.582561		0.661386
Tb927.10.6650	26.71	21.5	21.7	33.98	30.43	30.62		0.363		0.442884		0.663243
Tb927.10.6670	143.69	150.44	129.16	174.94	170.12	169.28		0.383		0.281076		0.0717858
Tb927.10.6680	51.28	56.47	46.86	54.41	57.76	58.34		0.378		0.141223		0.00125387
Tb927.10.6690	30.64	30.54	25.47	53.67	46.89	53.64		0.344		0.831531		0.0372342
Tb927.10.670	33.09	32.21	26.43	23.34	25.61	26.87		0.299		-0.274815		1.70912e-05
Tb927.10.6700	49.41	55.77	45.26	76.96	84.34	84.74		0.34		0.709705		0.148998
Tb927.10.6710	46.02	48.98	38.51	83.71	86.16	84.16		0.32		0.928051		0.00224605
Tb927.10.6770	21.34	19.83	19.73	25.34	25.36	24.57		0.287		0.305633		0.21848
Tb927.10.6780	73.01	78.48	65.06	90.13	86.33	96.93		0.366		0.33626		0.12712
Tb927.10.6790	28.91	32.38	25.2	44.31	51.65	58.9		0.325		0.840359		0.00626517
Tb927.10.680	35.21	36.89	29.14	49.89	52.27	49.83		0.384		0.586197		0.741852
Tb927.10.6800	80.88	84.86	68.42	77.41	72.92	83.03		0.419		-0.00493736		1.01311e-05
Tb927.10.6810	53.63	59.86	49.98	69.24	70.86	74.08		0.367		0.389798		0.328124
Tb927.10.6830	17.12	18.59	16.46	25.93	22.28	30.06		0.346		0.585239		0.8092
Tb927.10.6840	60.72	65.56	55.58	89.55	80.36	83.35		0.384		0.477791		0.805491
Tb927.10.6850	69.3	84.83	62.95	77.46	68.84	75.63		0.429		0.0318779		7.28527e-05
Tb927.10.6860	25.46	28.78	23.92	43.92	37.78	44.06		0.347		0.686171		0.296934
Tb927.10.6870	33.1	41.72	30.8	57.54	61.83	73.55		0.335		0.86912		0.0172845
Tb927.10.6880	227.51	251.43	192.18	241.75	243.9	269.06		0.428		0.169352		0.0013437
Tb927.10.690	34.77	33.84	28.11	58.26	46.54	55.56		0.325		0.729428		0.199346
Tb927.10.6980	36.16	37.86	27.22	49.12	49.03	44.22		0.363		0.491866		0.957681
Tb927.10.6990	50.6	56.41	41.97	78.42	71.58	74.61		0.36		0.592303		0.622491
Tb927.10.700	88.13	100.77	80.28	53.13	48.48	52.39		0.351		-0.805641		1.90769e-27
Tb927.10.7000	46.76	57.96	42.02	51.03	55.75	61.74		0.364		0.199658		0.0296573
Tb927.10.7010	23.23	28.6	24.2	32.59	32.78	37.57		0.327		0.437163		0.578882
Tb927.10.7020	67.94	74.76	56.66	58.45	64.79	75.09		0.383		-0.00747305		3.20343e-05
Tb927.10.7030	36.72	44.22	30.74	101.63	100.16	104.64		0.379		1.45619		6.26738e-15
Tb927.10.7050	22.82	22.95	17.41	27.13	26.8	25.13		0.358		0.32348		0.259485
Tb927.10.7060	52.4	57.16	50.46	71.35	78.5	81.14		0.352		0.529578		1
Tb927.10.7070	51.33	64.34	54.24	97.18	78.18	99.06		0.372		0.691615		0.28692
Tb927.10.7080	31.98	38.24	29.2	81.7	86.25	88.17		0.348		1.36521		3.81688e-13
Tb927.10.710	39.25	51.41	38.36	67.96	57.22	62.13		0.35		0.537833		0.923485
Tb927.10.7100	73.16	71.52	60.73	34.59	26.54	32.49		0.36		-1.13362		1.18993e-41
Tb927.10.7110	55.32	58.11	53.02	112.46	109.43	122.61		0.392		1.04942		3.92109e-06
Tb927.10.7120	98	103.6	75.81	128.5	121.08	129.02		0.403		0.448655		0.626837
Tb927.10.7130	19.63	24.32	18.95	34.52	36.41	39.2		0.351		0.808076		0.0360245
Tb927.10.7190	75.41	83.11	80.82	128.55	118.02	126.52		0.396		0.640462		0.44673
Tb927.10.720	34.47	40.54	32.28	47.76	53.7	58.75		0.355		0.578449		0.720326
Tb927.10.7200	18.9	20.41	18.31	26.69	28.07	32.88		0.33		0.60502		0.655453
Tb927.10.7210	20.94	19.5	21.81	31.58	24.99	24.97		0.315		0.389434		0.54234
Tb927.10.7220	15.5	17.23	13.23	22.66	24.17	27.92		0.316		0.701695		0.364582
Tb927.10.7230	78.99	91.94	80.26	55.47	86.62	89.2		0.362		-0.119076		7.18937e-05
Tb927.10.7240	40.78	44.62	35.38	59.3	56.7	64.35		0.35		0.578418		0.720382
Tb927.10.7250	47.13	47.08	41.49	55.11	54.85	55.19		0.329		0.283356		0.082194
Tb927.10.7270	32.81	34.46	31.28	43.98	50.58	53.24		0.346		0.584718		0.748683
Tb927.10.7290	42.29	45.15	38.48	51.51	73.56	78.84		0.38		0.695425		0.414933
Tb927.10.730	35	35.21	30.35	60.67	59.79	61.23		0.366		0.853422		0.00634266
Tb927.10.7320	35.17	39.25	29.23	42.37	31.3	40		0.32		0.133131		0.00844035
Tb927.10.7350	48.35	48.68	40.63	50.92	63.86	68.3		0.361		0.411365		0.342831
Tb927.10.7360	13.04	14.6	12.91	38.71	37.14	42.52		0.348		1.54553		5.75917e-15
Tb927.10.7370	11.88	13.5	11.34	17.4	18.57	18.43		0.305		0.567041		0.83947
Tb927.10.7380	31.96	33.73	27.52	37.36	40.95	40.5		0.352		0.3501		0.21179
Tb927.10.7390	40.96	42.88	44.7	38.22	28.52	41.71		0.328		-0.245187		6.80884e-05
Tb927.10.740	35.61	39.53	34.77	52.12	59.69	65.92		0.376		0.693365		0.180283
Tb927.10.7410	714.99	807.6	650.01	253.58	251.89	265.58		0.44		-1.49453		1.48757e-87
Tb927.10.7420	51.63	59.48	48.4	79.08	80.67	92.76		0.414		0.662694		0.294789
Tb927.10.7430	33.05	35.78	27.06	64.49	57	62.72		0.364		0.941899		0.00193675
Tb927.10.7440	46.47	47.88	43.05	42.48	47.37	49.58		0.391		0.021159		1.54316e-05
Tb927.10.7450	41.84	43.83	31.48	35.52	43.28	32.98		0.36		-0.0676949		0.000944296
Tb927.10.7470	33.21	31.7	30.35	58.4	55.78	55.64		0.343		0.834064		0.167858
Tb927.10.7480	37.3	39.29	47.03	75.58	65.95	58.48		0.331		0.69416		0.557689
Tb927.10.7490	34.49	34	28.48	57.07	56.18	57.49		0.344		0.816191		0.0242855
Tb927.10.750	34.27	33.51	29.3	115.43	97.91	90.54		0.317		1.64626		8.51515e-09
Tb927.10.7510	29.54	32.38	29.68	50.25	42.71	43.82		0.341		0.578438		0.765165
Tb927.10.7520	29.8	34.99	30.02	40.96	33.42	38.41		0.353		0.250528		0.0627099
Tb927.10.7540	14.22	15.24	12.09	26.59	34.68	35.52		0.32		1.22001		1.38566e-06
Tb927.10.7550	35.91	40.69	33.65	54.26	58.47	62.34		0.355		0.667153		0.287212
Tb927.10.7560	27.43	32.56	23.86	34.42	34.49	34.68		0.337		0.305002		0.292745
Tb927.10.7570	313.11	347.16	273.1	262.76	253.22	275.3		0.413		-0.238261		1.21115e-13
Tb927.10.7580	27.95	31.46	23.91	41.54	47.65	53.97		0.335		0.780894		0.0437903
Tb927.10.7590	29.62	29.22	26.7	42.68	44.37	38.4		0.297		0.552441		0.922741
Tb927.10.760	39.69	42.32	36.42	28.41	25.87	29.67		0.358		-0.496432		1.0722e-15
Tb927.10.7600	64.12	73.02	57.34	78.96	72.64	77.18		0.367		0.234339		0.02469
Tb927.10.7610	36.94	38.13	35.04	68.1	75	75.12		0.38		0.986838		2.93972e-05
Tb927.10.7620	70.59	79.34	63.75	93	86.02	93.71		0.38		0.352022		0.162228
Tb927.10.7630	36.39	37.85	33.42	38.02	40.32	40.56		0.326		0.143266		0.0016066
Tb927.10.7670	37.04	49.02	34.55	49.64	47.77	38.75		0.387		0.174953		0.0712687
Tb927.10.7680	67.17	74.48	60.68	85.97	85.01	90.93		0.397		0.372361		0.224476
Tb927.10.7690	65.96	71.03	61.59	90.02	97.84	103.18		0.393		0.551497		0.888647
Tb927.10.770	60.61	66.13	57.26	51.13	47.72	50.18		0.365		-0.304103		3.01601e-13
Tb927.10.7710	164.03	176.44	143.49	99.71	102.13	110.39		0.456		-0.632279		8.16834e-25
Tb927.10.7720	90.37	102.55	80.31	106.58	97.18	111.49		0.38		0.20638		0.0259534
Tb927.10.7730	58.72	67.6	53.19	63.41	64.67	69.57		0.355		0.138884		0.00317868
Tb927.10.7740	38.42	42.04	35.86	57.03	51.66	56.41		0.366		0.505241		0.919514
Tb927.10.7750	25.8	33.56	21.63	31.89	42.13	33.04		0.338		0.402604		0.69028
Tb927.10.7760	34.14	38.17	31.85	68.23	73.45	75.14		0.375		1.0577		0.0020529
Tb927.10.7770	45.04	49.13	38.06	66.02	67.46	68.28		0.352		0.609591		0.55783
Tb927.10.7790	89.61	106.16	78.03	126.32	127.91	132.64		0.407		0.498726		0.940585
Tb927.10.7800	51.78	55.36	47.85	76.84	64.36	73.2		0.324		0.46813		0.726918
Tb927.10.7810	71.92	75.57	61.52	51.93	70.02	66.86		0.392		-0.146637		5.17341e-09
Tb927.10.7820	46.72	45	53.92	207.44	157.79	174.82		0.341		1.89069		2.50505e-09
Tb927.10.7830	47.8	54.49	42.26	55.67	54.09	51.22		0.366		0.155313		0.004951
Tb927.10.7840	55.08	56.69	53.45	142.98	134.85	157.13		0.41		1.39649		2.55803e-12
Tb927.10.7850	34.53	33.22	30.14	80.83	75.86	76.8		0.381		1.25413		1.1561e-09
Tb927.10.7860	51.34	57.37	50.5	165.03	164.02	165.74		0.37		1.63589		5.81164e-24
Tb927.10.7870	159.62	178.91	129.94	154.71	161.84	154.6		0.4		0.00822978		1.26257e-05
Tb927.10.7880	84.56	91.48	77.4	100.95	119.76	117.21		0.424		0.415037		0.399832
Tb927.10.7890	46.9	52.62	44.64	48.3	54.77	59.62		0.341		0.174455		0.00249342
Tb927.10.790	25.35	28.75	25.7	45.59	39.78	45.28		0.337		0.711246		0.223412
Tb927.10.7900	34.05	35.1	26.57	66.9	62.32	70.82		0.304		1.0634		1.84973e-05
Tb927.10.7910	64.42	85.48	54.79	94.6	83.57	95.1		0.378		0.416886		0.669524
Tb927.10.7920	50.62	46.14	45.12	45.62	40.45	41.73		0.348		-0.150783		7.73424e-08
Tb927.10.7930	283.65	328.64	258.8	263.11	267.11	292.94		0.418		-0.0816489		3.75482e-09
Tb927.10.7940	44.67	55.89	41.47	65.87	64.73	69.43		0.352		0.494021		0.928488
Tb927.10.7960	28.12	28.56	30.12	67.24	62.32	64.96		0.414		1.16415		0.000166788
Tb927.10.7970	35.68	37.21	32.64	71.01	67.03	69.58		0.38		0.976292		0.00103882
Tb927.10.7980	25.39	26.78	22.28	39.55	32.94	40.74		0.339		0.604912		0.640662
Tb927.10.7990	54.73	60.39	49.79	81.63	79.86	82.8		0.391		0.566916		0.780559
Tb927.10.800	34.6	37.61	33.01	55.76	53.09	58.3		0.343		0.667734		0.296934
Tb927.10.8000	44.04	46.38	38.95	66.34	72.04	79.97		0.374		0.755139		0.0475502
Tb927.10.8010	35.65	42.68	31.94	52.83	48.08	51.42		0.37		0.46616		0.855554
Tb927.10.8020	119.7	136.4	110.57	134.78	137.02	153.25		0.413		0.21315		0.00504672
Tb927.10.8030	183.23	206.74	175.11	98.85	88.6	94.8		0.425		-1.00148		3.20676e-46
Tb927.10.8040	49.13	55.97	43.8	148.13	146.61	159.64		0.406		1.60956		7.79949e-24
Tb927.10.8060	43.56	52.16	41.91	51.98	54.05	56.66		0.355		0.241331		0.0401017
Tb927.10.8070	63.47	78.11	61.32	86.91	77.45	86.12		0.347		0.303927		0.0898278
Tb927.10.8080	34.54	36.72	32.41	74.65	75.91	81.55		0.364		1.16281		6.01559e-08
Tb927.10.8090	106.75	105.14	105.68	135.12	100.16	109.57		0.338		0.118894		0.019859
Tb927.10.810	40.16	46.41	38.38	33.28	32.66	39.8		0.355		-0.24083		7.87142e-11
Tb927.10.8100	23.91	30.2	21.2	38.68	37.2	36.3		0.353		0.574902		0.776913
Tb927.10.8120	24.27	25.29	22.51	31.62	30.19	32.03		0.332		0.380804		0.296934
Tb927.10.8130	33.7	39.83	34.56	58.34	52.87	55.79		0.316		0.627615		0.524401
Tb927.10.8140	45.11	44.6	30.46	57.73	49.81	46.33		0.363		0.356635		0.572363
Tb927.10.8150	41.79	50	42.6	70.6	70.03	77.69		0.385		0.700019		0.230111
Tb927.10.8160	45.77	42.35	33.99	72.96	57.32	62.09		0.302		0.655702		0.538276
Tb927.10.8170	46.39	48.45	42.38	53.16	61.58	63.51		0.336		0.377411		0.220623
Tb927.10.8180	28.43	32.19	25.44	71.58	81.68	94.47		0.345		1.52535		9.36581e-17
Tb927.10.8190	366.91	396.5	321.73	179.62	179.05	189.64		0.407		-0.984817		2.10569e-48
Tb927.10.8200	143.66	147.41	113.95	136.53	100.06	135.86		0.365		-0.120946		2.41594e-06
Tb927.10.8210	39.32	41.53	37.18	51.06	52.92	55.42		0.367		0.433498		0.54484
Tb927.10.8220	25.74	22.61	22.4	52.29	40.58	48.85		0.294		1.00224		0.00338235
Tb927.10.8230	266.57	281.87	233.91	813.55	770.08	808.09		0.415		1.61216		3.01167e-27
Tb927.10.8240	47.66	46.2	49.15	117.59	103.96	107.61		0.378		1.20267		8.20833e-08
Tb927.10.8250	32.73	33.27	28.59	55.41	46.6	52.4		0.36		0.707007		0.325846
Tb927.10.8310	41.97	48.16	32.77	60.99	52.91	58.88		0.334		0.491451		0.966034
Tb927.10.8320	414.88	357.49	373.33	139.77	110.89	122.96		0.365		-1.61659		9.60532e-33
Tb927.10.8360	45.62	43.28	38.24	59.34	55.23	53.48		0.338		0.402473		0.436256
Tb927.10.8370	45.2	37.83	34.34	54.83	48.54	45.78		0.352		0.3457		0.343273
Tb927.10.8380	23.28	24.53	20.83	45.36	35.89	35.78		0.276		0.769757		0.163455
Tb927.10.8390	19.83	22.15	19.46	31.42	47	47.93		0.328		1.04018		0.0189328
Tb927.10.8400	58.23	62.76	52.79	114.05	121.29	123.19		0.382		1.04483		2.74523e-05
Tb927.10.8410	70.86	73.96	64.71	54.8	40.89	46.27		0.334		-0.561672		2.3941e-19
Tb927.10.8420	30.95	33.64	29.56	39.75	49.84	50.8		0.333		0.576407		0.745755
Tb927.10.8540	74.46	82.04	76.18	84.55	84.87	78.79		0.384		0.093214		0.00118728
Tb927.10.8560	45.11	42.9	37.48	49.49	57.22	49.7		0.355		0.31776		0.316203
Tb927.10.8570	28.02	32.51	29.23	55.02	57.13	63.13		0.336		0.965517		0.000709419
Tb927.10.8590	24.54	27.02	22.06	51.9	66.33	71.45		0.343		1.3654		1.64056e-08
Tb927.10.8600	22.51	23.4	19.56	44.43	50.81	50.54		0.35		1.15489		4.97559e-08
Tb927.10.8620	76.49	67.35	74.95	110.24	88	97.02		0.348		0.432439		0.678546
Tb927.10.8630	128.08	132.22	106.09	126.91	109.48	139.88		0.325		0.0383881		9.57373e-05
Tb927.10.8640	21.86	23.67	23.16	27.19	25.52	24.93		0.319		0.1767		0.0440331
Tb927.10.8650	87.22	93.93	78.05	101.13	93.83	92.82		0.388		0.150901		0.00330777
Tb927.10.8660	54.58	48.4	47.57	70.66	64.29	77.68		0.354		0.498102		0.885044
Tb927.10.8670	50.62	53.61	51.11	111.7	94.08	111.63		0.33		1.03092		0.000186469
Tb927.10.8680	20.35	19.06	16.22	19.48	20.18	21.82		0.32		0.144254		0.00719538
Tb927.10.8690	50.52	58.23	44.47	64.5	63.87	72.84		0.384		0.393097		0.363397
Tb927.10.870	28.92	32.07	25.97	68.62	82.31	88.01		0.362		1.45822		1.32255e-17
Tb927.10.8710	46.7	52.67	50.31	81.63	64.11	71.83		0.412		0.539598		0.971652
Tb927.10.8720	140.59	160.67	124.17	206.79	224.97	243.26		0.361		0.666008		0.221571
Tb927.10.8730	28.69	36.08	25.33	4.89	16.77	17.57		0.351		-1.19957		6.25148e-11
Tb927.10.8760	41.67	45.86	37.61	55.68	52.18	60.74		0.363		0.430062		0.548685
Tb927.10.8780	54.21	59.52	51.66	63.23	79.55	85.35		0.356		0.463984		0.611134
Tb927.10.8790	51.81	56.51	47.94	42.9	37.43	41.04		0.359		-0.364537		2.91558e-11
Tb927.10.880	62.62	71.89	56.64	98.02	97.88	96.15		0.361		0.61151		0.502008
Tb927.10.8800	32.11	33.21	27.71	71.13	71.14	79.09		0.382		1.25063		3.11914e-09
Tb927.10.8810	23.69	26.85	21.79	31.59	32.27	35.29		0.346		0.455019		0.667918
Tb927.10.8820	69.02	77.33	62.36	39.04	50.39	53.72		0.365		-0.543972		2.23609e-23
Tb927.10.8830	47.27	49.4	42.61	121.72	176.71	187.25		0.345		1.80202		1.2617e-07
Tb927.10.8840	26.18	30.17	26.47	57.43	43.84	53.36		0.357		0.900769		0.0299576
Tb927.10.8850	44.32	48.29	40.65	54.86	57.58	63.5		0.339		0.40084		0.371238
Tb927.10.8860	16.01	17.11	13.62	67.2	80.59	89.63		0.329		2.34471		3.46617e-33
Tb927.10.8870	110.38	116.14	86.61	125.64	104.41	130.28		0.405		0.202557		0.0165728
Tb927.10.8880	55.47	58.58	49.23	61.63	52.34	60.94		0.335		0.0992647		0.000593341
Tb927.10.8900	18.62	18.6	18.29	22.02	50.33	50.82		0.34		1.14983		0.182981
Tb927.10.8910	34.21	37.23	31.35	43.34	53.3	56.78		0.331		0.577787		0.738441
Tb927.10.8920	47.91	48.08	41.07	91.29	88.26	88.38		0.362		0.967049		0.000265232
Tb927.10.8930	85.92	91.2	76.72	106.47	113.85	120.78		0.345		0.426275		0.423477
Tb927.10.8940	1071.42	1207.18	946.45	989.73	1115.81	1162.53		0.415		0.0191174		5.83459e-07
Tb927.10.8960	29.16	35.18	29.18	41.95	34.98	36.83		0.412		0.282647		0.107542
Tb927.10.8990	22.71	22.92	21.17	37.23	37.37	39.68		0.316		0.774653		0.140589
Tb927.10.900	25.78	28.84	25.19	34.56	36.21	30.96		0.34		0.350104		0.492419
Tb927.10.9000	25.23	27.77	25.97	35.89	43.3	44.16		0.322		0.643381		0.395945
Tb927.10.9010	21.44	30.21	23.54	31.37	24.33	30.96		0.341		0.204825		0.139778
Tb927.10.9020	34.79	35.6	33.37	43.85	47.77	46.36		0.373		0.411209		0.416963
Tb927.10.9030	141.2	153.72	142.68	125.13	99.52	98.3		0.331		-0.438302		1.14575e-15
Tb927.10.9040	18.88	19.3	16.85	28.11	33.91	36.36		0.319		0.838147		0.0117444
Tb927.10.9050	35.67	37.97	30.04	35.03	33.03	35.44		0.342		-0.00250686		4.52209e-05
Tb927.10.9060	35.29	40.84	34.57	42.73	43.32	50.24		0.342		0.300024		0.126812
Tb927.10.9070	26.9	28.32	21.39	42.95	41.56	47.47		0.327		0.784715		0.0645635
Tb927.10.9090	16.09	17.56	15.45	25.47	23.25	24.05		0.345		0.567621		0.825708
Tb927.10.910	25.78	28.29	22.59	39.73	37.58	40.37		0.365		0.618323		0.535973
Tb927.10.9100	32.67	39.05	33.56	51.58	56.33	61.44		0.361		0.685777		0.245031
Tb927.10.9110	36.78	36.53	25.83	53.29	49.9	45.38		0.342		0.583604		0.70572
Tb927.10.9120	35.14	36.89	27.02	47.67	43.32	43.54		0.38		0.441699		0.668952
Tb927.10.9140	32.6	36.33	29.51	49.41	47.27	53.7		0.363		0.611296		0.56871
Tb927.10.9150	50.61	55.11	50.54	65.09	65.64	67.54		0.395		0.343518		0.211336
Tb927.10.9160	39.58	45.14	33.85	58.44	62.72	69.09		0.352		0.682157		0.23139
Tb927.10.9170	44.61	45.47	41.58	99.8	87.74	88.68		0.344		1.069		5.40309e-05
Tb927.10.9180	35.94	41.53	33.63	69.94	66.53	82.79		0.305		0.980784		0.000196064
Tb927.10.9190	141.46	151.41	123.12	147.44	156.69	166.58		0.402		0.17829		0.00111772
Tb927.10.920	36.39	40.24	34.7	34.44	33.17	34.28		0.389		-0.12783		7.66175e-06
Tb927.10.9200	21.79	22.22	20.69	21.99	18.01	19.87		0.347		-0.111932		5.88302e-05
Tb927.10.9210	22.01	23.08	19.14	22.39	19.4	18.65		0.349		-0.0877436		0.000148359
Tb927.10.9230	22.65	29	22.94	37.63	42.28	44.27		0.354		0.735379		0.131481
Tb927.10.9240	24.23	28.08	23.02	51.74	48.2	48.76		0.34		0.981108		0.00350835
Tb927.10.9250	105.34	110.76	97.8	187.24	171.1	169.33		0.427		0.749331		0.0554873
Tb927.10.9260	66.04	71.27	60.29	59.82	59.14	62.69		0.351		-0.121422		1.73881e-07
Tb927.10.9270	15.31	18.27	16.4	42.26	43.06	48.5		0.365		1.42087		1.45662e-06
Tb927.10.9280	26.08	26.11	21.97	49.12	48.31	53.54		0.339		1.02555		3.32981e-05
Tb927.10.9290	37.37	37.49	33.05	87.67	82.44	96.6		0.343		1.30544		3.87609e-10
Tb927.10.930	42.24	50.98	42.12	57.29	70.48	79.15		0.371		0.612485		0.588502
Tb927.10.9320	12.73	10.48	10.79	24.84	19.19	18.74		0.35		0.88454		0.133117
Tb927.10.9330	61.56	74	56.69	69.35	112.64	113.14		0.363		0.618367		0.753285
Tb927.10.9350	31.68	33.72	30.69	29.77	38.58	42.28		0.32		0.203284		0.0105004
Tb927.10.9360	29.33	37.72	31.75	45.15	51.43	60.6		0.37		0.669835		0.351697
Tb927.10.9370	45.95	47.71	35.74	97.83	80.03	99.73		0.342		1.10112		1.03166e-05
Tb927.10.9380	35.66	38.7	32.28	65.88	71.59	71.79		0.37		0.972548		0.000319327
Tb927.10.9390	40.47	44.43	39.4	71.44	62.65	64.21		0.355		0.673858		0.333032
Tb927.10.940	23.4	21.36	19.68	36.95	35.21	44.87		0.368		0.86085		0.0450242
Tb927.10.9400	53.56	51.84	44.46	82.8	70.95	74.85		0.402		0.60921		0.592772
Tb927.10.9410	54.51	60.47	49.62	83.92	80.86	93.45		0.391		0.649692		0.388272
Tb927.10.9420	21.48	22.98	20.25	48.52	49.56	45.31		0.337		1.14788		3.67968e-06
Tb927.10.9440	118.06	129.68	101.55	82.83	80.19	88.65		0.374		-0.472892		1.75848e-21
Tb927.10.950	26.75	29.12	25.3	49.21	51.66	55.79		0.347		0.948618		0.00326822
Tb927.10.9560	17.78	19.59	17.78	38.09	33.87	34.14		0.34		0.943992		0.0213089
Tb927.10.9570	121.53	131.09	111.04	162.43	169.52	178.69		0.371		0.489716		0.798124
Tb927.10.9590	31.5	36.44	29.3	37.94	33.01	35.43		0.298		0.129605		0.00889659
Tb927.10.960	21.94	25.32	20.92	35.19	34.24	41.7		0.343		0.704828		0.237324
Tb927.10.9640	73.11	75.99	61.4	110.44	96.8	105.77		0.365		0.572389		0.725674
Tb927.10.9650	46.26	49.14	41.8	71.35	76.81	83.1		0.325		0.753235		0.0497367
Tb927.10.9660	35.3	39.86	35.29	60.06	61.08	65.41		0.352		0.756169		0.0733001
Tb927.10.9670	28.88	31.83	25.42	50.24	51.17	57.52		0.342		0.883804		0.00204261
Tb927.10.9680	24.9	25.79	22.47	36.29	31.68	34.79		0.323		0.490152		0.856322
Tb927.10.9690	21.65	24.37	19.25	34.18	40.77	41.48		0.34		0.834971		0.0074279
Tb927.10.970	43.13	50.14	41.16	71.52	82.87	92.36		0.363		0.876195		0.00143828
Tb927.10.9700	33.02	35.47	32.03	33.63	51.02	58.44		0.348		0.50944		0.953217
Tb927.10.9720	52.65	61.8	46.89	76.47	83.58	96.05		0.326		0.666603		0.278152
Tb927.10.9730	36.25	41.04	32.14	83.1	76.5	75.88		0.329		1.1056		3.82905e-06
Tb927.10.9740	76.69	77.91	65.08	90.38	96.83	102.96		0.392		0.401495		0.346075
Tb927.10.9750	16.61	18.17	15.1	24.8	35.7	39.36		0.331		1.00145		0.0289199
Tb927.10.9770	37.61	38.84	33.55	49.6	50.51	59.34		0.36		0.535601		0.999622
Tb927.10.9780	49.11	53.8	44.17	46.83	46.76	51.77		0.387		-0.0169708		1.40857e-06
Tb927.10.9790	55.91	48.75	40.06	64.06	46.71	66.21		0.432		0.290322		0.300472
Tb927.10.980	23.98	25.49	20.96	48.53	51.63	55.47		0.359		1.14386		1.52227e-06
Tb927.10.9810	61.46	66.48	56.34	45.42	45.22	44.25		0.359		-0.450116		5.24825e-13
Tb927.10.9820	76.24	85.2	69.26	67.84	67.59	70.72		0.373		-0.162324		1.75268e-09
Tb927.10.9830	224.46	223.4	197.56	120.11	108.09	112.32		0.415		-0.922499		5.23622e-40
Tb927.10.9840	97.56	107.78	92.16	117.23	112.16	124.2		0.396		0.249188		0.0259281
Tb927.10.9850	13.76	15.12	11.71	50.78	53.45	56.08		0.342		1.98167		1.67247e-28
Tb927.10.9860	31.2	32.62	26.34	40.14	34.94	38.48		0.366		0.332895		0.232708
Tb927.10.9870	58.35	61.88	58.13	103.07	99.21	104.47		0.413		0.782271		0.0504929
Tb927.10.9890	46.92	53.33	47.45	42.92	45.8	46.23		0.334		-0.130245		3.85695e-09
Tb927.10.9900	44.45	48.74	37.31	63.09	62.19	65.79		0.365		0.550051		0.872339
Tb927.10.9920	30.86	34.21	28.54	28.14	24.67	24.61		0.356		-0.273956		2.69836e-09
Tb927.10.9930	28.81	31.12	25.63	40.41	42.83	42.5		0.318		0.555435		0.864963
Tb927.10.9940	31.31	32.52	27.91	42.13	42.94	39.96		0.327		0.446651		0.77039
Tb927.10.9950	50.93	54.3	39.98	63.64	63.3	69.89		0.356		0.438809		0.637899
Tb927.10.9960	20.16	24.54	16.67	22.48	21.48	20.87		0.306		0.079128		0.00904134
Tb927.10.9970	30.72	31.16	25.73	47.26	51.21	50.92		0.345		0.769916		0.0464616
Tb927.10.9980	30.69	26.59	25.23	37.37	33.28	36.85		0.35		0.381696		0.446878
Tb927.10.9990	56.37	56.5	49.01	54.61	44.48	53.68		0.38		-0.0835635		1.06872e-05
Tb927.11.1000	118.77	123.35	108.27	145.15	141.44	143.16		0.382		0.294536		0.120721
Tb927.11.10000	35.55	37.4	29.06	73.19	72.01	76.69		0.422		1.12113		1.8917e-06
Tb927.11.10010	44.89	43.39	41.02	79.15	79.94	80.53		0.39		0.890026		0.00330122
Tb927.11.10020	47.15	51.63	40.47	69.26	56.1	58.27		0.331		0.399124		0.429452
Tb927.11.10040	31.61	31.48	27.08	30.64	27.5	24.69		0.31		-0.122494		0.000512326
Tb927.11.10050	28.28	23.99	31.46	40.96	33.76	34.83		0.463		0.387773		0.626682
Tb927.11.10060	203.06	214.08	172.63	107.95	97.79	115.14		0.364		-0.878119		2.01903e-37
Tb927.11.10070	104.74	124.54	101.89	103.68	90.09	99.5		0.373		-0.175342		2.9386e-09
Tb927.11.10080	50.49	43.5	43.72	51.86	38.36	43.78		0.376		-0.0394003		0.00103904
Tb927.11.10090	43.97	48	36.48	51.35	54.69	59.21		0.374		0.363443		0.25435
Tb927.11.1010	72.1	75.78	62.25	66.26	71.52	82.83		0.374		0.070216		0.000511642
Tb927.11.10100	44.62	45.17	38.31	41.78	40.61	42.25		0.338		-0.0395033		0.000148911
Tb927.11.10120	48.04	55.79	45.71	73.23	82.77	83.86		0.369		0.681661		0.206499
Tb927.11.10130	24.02	26.89	21.43	45.83	40.15	38.5		0.327		0.783048		0.119329
Tb927.11.10140	53.53	54.81	52.2	27.4	24.62	30.47		0.365		-0.960642		1.53182e-26
Tb927.11.10150	66.67	81.49	67.19	66.19	81.4	87.97		0.378		0.129411		0.000320863
Tb927.11.10170	51.17	66.01	54.69	54.77	53.56	47.64		0.327		-0.140049		5.8197e-06
Tb927.11.10180	35.64	33.51	30.26	63.16	64.89	66.27		0.327		0.966972		0.000404831
Tb927.11.10190	21.37	20.51	18.64	46.17	46.26	52.07		0.315		1.25559		3.65229e-10
Tb927.11.1020	370.42	379.28	319.96	210.49	234.56	253.66		0.382		-0.614387		2.28945e-29
Tb927.11.10200	62.7	66.65	53.63	76.18	86.92	92.51		0.363		0.482258		0.779152
Tb927.11.10210	36.4	38.95	30.85	49.01	52.95	61.97		0.323		0.626296		0.462474
Tb927.11.10220	106.11	110.03	91.65	150.61	125.78	141.88		0.305		0.442488		0.648114
Tb927.11.10230	50.98	56.31	46.58	82.65	73.83	76.22		0.357		0.596759		0.615367
Tb927.11.10240	125.73	141.17	118.94	108.62	100.38	102.85		0.387		-0.30715		1.13631e-14
Tb927.11.10250	21.32	19.96	18.23	27.93	23.06	24.27		0.393		0.338751		0.293868
Tb927.11.10260	51.4	51.9	53.89	78.2	77.94	76.36		0.35		0.564721		0.835466
Tb927.11.10270	27.3	27.86	26.89	44.06	38.93	48.25		0.352		0.677632		0.352423
Tb927.11.10280	44.6	50.34	39.76	46.3	65.77	65.35		0.36		0.397419		0.452214
Tb927.11.1030	49.4	54.07	43.54	82.14	94.25	102.1		0.35		0.921711		0.000492358
Tb927.11.10300	47.13	49.89	40.95	61.75	62.27	66.22		0.36		0.463466		0.715499
Tb927.11.10320	28.37	32.89	28.76	44.33	43.4	49.13		0.328		0.604383		0.652456
Tb927.11.10330	56.75	55.35	47.42	42.82	50.54	52.65		0.362		-0.12767		6.32996e-08
Tb927.11.10340	63.39	66.43	56.31	85.09	85.05	88.59		0.335		0.475137		0.782427
Tb927.11.10350	46.1	48.68	39.32	67.86	68.79	68.79		0.374		0.615408		0.567873
Tb927.11.10360	25.12	27.17	22.44	32.11	26.34	34.96		0.327		0.321889		0.240648
Tb927.11.10380	49	53.92	39.04	48.95	58.24	57.05		0.334		0.210321		0.0281699
Tb927.11.10390	14.15	13.96	11.79	22.86	24.34	25.32		0.332		0.86199		0.0284333
Tb927.11.1040	32.2	30.93	29.38	41.37	39.65	44.73		0.308		0.442877		0.584664
Tb927.11.10400	46.82	48.7	36.13	58.35	47.3	58.79		0.415		0.320854		0.252986
Tb927.11.10410	13.14	11.68	13.69	14.19	16.94	17.24		0.307		0.328879		0.532369
Tb927.11.10420	29.4	27.28	22.28	29.05	32.47	29.62		0.335		0.206962		0.124507
Tb927.11.10430	42.69	50.14	39.87	74.02	79.79	88.28		0.378		0.867375		0.00561994
Tb927.11.10440	49.71	58.19	45.27	48.92	45.67	50.06		0.376		-0.0825674		6.4127e-05
Tb927.11.10450	36.69	41.51	33.08	71.7	81.34	80.76		0.355		1.07108		7.75598e-06
Tb927.11.10460	39.51	40.53	30.78	75.45	77.36	85.29		0.393		1.10335		2.03455e-06
Tb927.11.10470	18.48	21.92	19.57	29.14	36.65	36.16		0.341		0.765549		0.0743599
Tb927.11.10480	46.09	53.41	42.89	33.28	35.65	36.91		0.355		-0.427963		8.69731e-17
Tb927.11.1050	69.35	76.67	56.87	62.7	70.51	70.57		0.395		0.00631471		8.63251e-05
Tb927.11.10500	12.58	13.68	12.67	17.01	17.59	17.26		0.332		0.41374		0.593787
Tb927.11.10510	83.55	95.94	75.43	110.05	93.9	113.69		0.368		0.317348		0.139911
Tb927.11.10520	26.78	30.61	25.19	36.58	46.02	48.8		0.354		0.670101		0.273242
Tb927.11.10530	25.13	26.76	21.77	30.48	30.04	27.06		0.338		0.24972		0.190777
Tb927.11.10540	91.87	104.27	87.55	141.76	162.31	168.34		0.386		0.735724		0.0665286
Tb927.11.10550	24.79	22.48	21.21	37.61	37.15	35.53		0.315		0.687547		0.24909
Tb927.11.10560	111.29	134.4	105.41	92.14	136.63	149.29		0.391		0.106733		0.0183491
Tb927.11.10570	70.99	90.44	65.41	67.52	71.36	74.67		0.366		-0.0871012		8.87445e-07
Tb927.11.10580	23.36	22.75	21.67	36.94	44.37	46.87		0.348		0.91924		0.00262342
Tb927.11.10590	38.42	41.63	33.7	61.52	68.72	68.88		0.351		0.807772		0.0303463
Tb927.11.1060	20.61	20.58	20.01	36.46	38.48	37.91		0.336		0.882803		0.00899711
Tb927.11.10600	33.74	31.94	29.59	48.08	48.14	50.1		0.355		0.619033		0.576674
Tb927.11.10610	25.3	28.02	24.5	43.41	56.55	59.64		0.355		1.03625		0.000424613
Tb927.11.10620	40.8	39.78	37.77	71.86	70.39	65.17		0.387		0.809495		0.0733319
Tb927.11.10630	25.79	29.89	22.82	27.41	30.83	35.27		0.33		0.252428		0.036561
Tb927.11.10640	15.83	15.82	13.48	43.32	40.87	43.12		0.349		1.49619		6.97616e-13
Tb927.11.10650	40.12	44.17	37.5	57.07	64.65	71.14		0.354		0.663158		0.294413
Tb927.11.10670	20.84	22.76	19.01	25.95	29.62	29.98		0.355		0.450375		0.613918
Tb927.11.10690	35.08	36.77	35	171.89	175.13	187.6		0.369		2.32293		6.28957e-50
Tb927.11.1070	89.35	95.03	80.39	91.79	90.88	98.31		0.337		0.0857278		5.18973e-05
Tb927.11.10700	31.39	37.67	25.76	78.85	84.47	75.78		0.365		1.33435		5.74479e-08
Tb927.11.10710	34.77	38.83	29.63	56.89	55.5	59.03		0.326		0.731673		0.0851005
Tb927.11.10720	21.36	22.93	22.22	63.81	67.35	65.04		0.331		1.56068		5.47679e-19
Tb927.11.10730	27.09	31.31	26.02	60.27	71.45	76.79		0.36		1.30446		1.48543e-12
Tb927.11.10740	49.13	46.5	45.02	86.21	79.59	65.35		0.373		0.71672		0.320015
Tb927.11.10750	40.01	43.28	32.83	53.57	53.19	52.46		0.374		0.455405		0.685202
Tb927.11.10760	94.62	104.89	86.65	110.42	125.62	131.97		0.397		0.362923		0.17257
Tb927.11.10770	65.8	69.2	53.7	87.43	86.87	91.27		0.37		0.492998		0.859247
Tb927.11.10780	71.3	87.1	63.41	55.44	55.89	64.86		0.366		-0.332192		9.08451e-12
Tb927.11.1080	45.98	52.25	40.38	67.06	56.85	60.23		0.326		0.409772		0.469934
Tb927.11.10800	20.93	21.91	18.71	48.15	74.59	77.24		0.356		1.70002		1.5642e-05
Tb927.11.10820	97.33	118.44	84.95	103.1	114.35	129.37		0.391		0.205766		0.00952893
Tb927.11.10840	35.84	36.85	29.08	43.99	42.36	50.72		0.384		0.429601		0.56871
Tb927.11.10850	41.29	47.34	38.04	63.26	66.02	66.82		0.368		0.630515		0.475489
Tb927.11.10860	73.83	92.41	76.78	66.67	71.15	71.7		0.378		-0.213987		1.4636e-09
Tb927.11.10870	21.25	23.84	18.31	39.3	41.26	37.49		0.321		0.896843		0.0265775
Tb927.11.10880	56.3	62.28	48.91	82.53	84.22	88.88		0.419		0.609982		0.530146
Tb927.11.10890	23.7	26.22	21.56	46.2	41.52	46.59		0.373		0.909955		0.00896941
Tb927.11.10900	50.72	59.19	42.17	87.89	98.78	100.46		0.428		0.916874		0.000511642
Tb927.11.10920	48.06	46.72	38.81	39.86	36.88	41.67		0.321		-0.174021		2.90439e-07
Tb927.11.10930	42.26	50.69	41.23	60.6	59.1	66.69		0.338		0.474155		0.769931
Tb927.11.10940	45.36	49.02	47.41	36.03	57.89	64.74		0.39		0.162183		0.0987618
Tb927.11.10950	61.85	65.71	54.3	105.79	109.25	119.9		0.401		0.881074		0.00518343
Tb927.11.10960	79.5	83.98	67.74	66.15	73.63	71.92		0.386		-0.127245		5.75263e-09
Tb927.11.10970	19.73	22.44	20.34	43.92	43.08	52.42		0.382		1.15728		0.000189506
Tb927.11.10990	43.82	54.47	43.04	59.58	54.99	53.61		0.38		0.250938		0.0703787
Tb927.11.11000	57.7	64.58	56.19	93.16	93.48	101.05		0.382		0.688833		0.192762
Tb927.11.11010	309.56	361.09	279.04	376.91	399.14	418.91		0.456		0.331434		0.0940248
Tb927.11.11020	18.86	21.53	18.79	41.76	48.94	56.32		0.35		1.31283		9.65159e-10
Tb927.11.11030	57.42	67.02	59.06	73.29	77.1	75.38		0.347		0.299074		0.161215
Tb927.11.11050	14.09	13.76	13.08	35.87	31.04	28.05		0.379		1.21416		0.000162555
Tb927.11.11080	77.95	88.56	72.02	96.38	110.8	119.79		0.341		0.454988		0.57339
Tb927.11.11090	43.51	45.56	39.1	74.15	104.48	116.9		0.402		1.20525		0.00177315
Tb927.11.11100	63.74	63.28	65.3	81.52	62.09	71.45		0.352		0.16123		0.0364113
Tb927.11.11120	35.65	29.8	29.56	42.49	44.03	40.99		0.387		0.424459		0.60395
Tb927.11.11130	36.97	43.9	32.84	31.59	27.68	37.58		0.375		-0.231535		7.70859e-07
Tb927.11.11140	28.24	30.79	25	63.05	68.12	69.75		0.34		1.25764		1.7932e-11
Tb927.11.11150	25.8	27.76	24.61	41.87	34.23	38.8		0.301		0.555692		0.911757
Tb927.11.11160	32.19	34.71	31.14	54.88	60.97	64.5		0.348		0.879357		0.00330303
Tb927.11.11170	46.07	43.04	44.69	78.75	68.66	76.29		0.387		0.741487		0.165439
Tb927.11.11180	29.3	44.87	32.35	55.89	65.88	60.64		0.346		0.77606		0.208205
Tb927.11.11200	30.42	33.48	26.47	30.27	33.75	34.36		0.338		0.122521		0.00567975
Tb927.11.11210	122.71	136.23	104.11	94.66	95.41	99.04		0.381		-0.32855		3.32284e-13
Tb927.11.11240	56.31	57.12	56.53	66.45	55.42	59.69		0.33		0.0952511		0.00914258
Tb927.11.11250	143.66	152.45	120.22	227.74	204.17	204.97		0.386		0.613294		0.46048
Tb927.11.11260	37.72	43	35.26	60.55	62.26	63.58		0.304		0.684448		0.258724
Tb927.11.11270	31.91	33.86	30.37	40.93	37.76	42.31		0.313		0.331798		0.172579
Tb927.11.11280	37.06	39.31	34.41	50.08	53.26	57.2		0.34		0.535235		1
Tb927.11.11300	45.51	41.02	39.02	44.62	36.17	43.89		0.374		-0.010032		0.00273343
Tb927.11.11310	29.98	32.16	25.2	38.57	40.1	47.32		0.366		0.528595		1
Tb927.11.11320	62.53	71.46	53.5	63.58	63.64	69.93		0.394		0.0724801		0.000121738
Tb927.11.11340	29.17	30	29.66	34.88	38.12	38.67		0.325		0.330123		0.12942
Tb927.11.11380	53.33	58.78	49.38	34.44	35.13	37.92		0.362		-0.587242		1.35438e-21
Tb927.11.11390	58.18	60.72	50.88	64.36	64.84	65.76		0.355		0.199512		0.0101068
Tb927.11.11430	32.04	33.2	28.5	44.16	42.45	47.49		0.354		0.516573		0.97265
Tb927.11.11440	20.51	21.27	18.49	32	25.98	26.05		0.35		0.479464		0.815514
Tb927.11.11450	25.67	27.84	24.47	27.79	26.07	31.5		0.335		0.130456		0.00481582
Tb927.11.11460	154.15	171.73	144.87	104.96	118.96	132.39		0.371		-0.401828		1.50316e-18
Tb927.11.11470	58.7	51.51	52.05	39.46	33.5	32.93		0.348		-0.615741		2.91546e-15
Tb927.11.11480	84.05	98.99	76.04	122.4	140.61	149.79		0.402		0.672045		0.208412
Tb927.11.11490	29.38	28.67	25.75	42.29	39.5	44.85		0.342		0.595711		0.667933
Tb927.11.1150	81.49	91.35	74.13	71.91	77.24	83.29		0.408		-0.0874774		3.33263e-08
Tb927.11.11500	48.15	51.79	44.1	68.76	78.31	80.58		0.354		0.660348		0.291861
Tb927.11.11510	44.65	51.52	37.89	82.08	83.21	91.66		0.373		0.938609		0.00179764
Tb927.11.11520	456.11	518.24	472.27	316.35	317.28	308.28		0.378		-0.619025		3.40636e-28
Tb927.11.11530	38.25	40.4	34.62	67.5	65.95	72.46		0.388		0.862248		0.0044861
Tb927.11.11570	54.51	59.6	47.87	54.8	56.35	62.1		0.339		0.0970397		0.000187938
Tb927.11.11580	28.12	32.26	24.49	32.39	33.47	33.49		0.381		0.227265		0.0341951
Tb927.11.11590	219.39	222.68	188.18	150.54	139.42	145.65		0.375		-0.532887		3.99502e-24
Tb927.11.1160	26.06	26.25	24.13	40.73	45.6	53.45		0.332		0.870758		0.00542102
Tb927.11.11610	43.2	45.86	36.13	58.79	65.29	73.01		0.362		0.654735		0.345299
Tb927.11.11620	80.58	86.78	70.04	55.86	55.02	60.56		0.412		-0.469616		2.00281e-16
Tb927.11.11630	46.07	49.88	45.52	57.68	55.49	57.5		0.39		0.270713		0.0709642
Tb927.11.11640	30.45	34.69	27.31	45.14	47.59	51.09		0.372		0.637519		0.416963
Tb927.11.11660	32.07	34.96	26.47	73.12	71.82	72.79		0.365		1.2195		2.09267e-07
Tb927.11.11670	20.55	18.51	19.03	51.55	56.69	49.34		0.299		1.43972		4.3007e-12
Tb927.11.11680	342.08	365.7	314.71	163.8	166.85	172.09		0.426		-1.0242		1.12094e-52
Tb927.11.11690	151.99	176.75	145.4	346.61	337.33	374.5		0.425		1.15855		7.6291e-10
Tb927.11.1170	25.32	27.38	24.24	46.03	52.35	59.79		0.331		1.03967		4.60288e-05
Tb927.11.11700	63.33	74.07	59.39	67.03	76.45	82.72		0.347		0.200942		0.00669571
Tb927.11.11710	21.61	22.49	23.79	113.1	110.58	124.71		0.36		2.35943		5.09688e-47
Tb927.11.11720	56.13	54.44	51.05	88.83	79.32	82.19		0.335		0.631283		0.429201
Tb927.11.11730	174.79	189.55	165.97	132.78	104.11	119.34		0.394		-0.574027		4.37206e-24
Tb927.11.11760	48.73	53.2	44.65	64.06	69.55	72.51		0.362		0.491796		0.852134
Tb927.11.11770	54.54	63.28	55.44	49.47	60.39	62.89		0.376		-0.00425291		1.26051e-06
Tb927.11.11780	64.97	68.68	60.18	40.36	42.75	43.74		0.346		-0.611668		1.12246e-22
Tb927.11.11790	39.28	37.43	32.5	56.91	57.37	56.79		0.384		0.647482		0.387526
Tb927.11.1180	19.37	17.6	15.08	66.75	61.08	65.45		0.359		1.89272		8.15875e-31
Tb927.11.11800	19.53	19.42	18.51	46.19	44.69	47.93		0.347		1.27248		1.08977e-09
Tb927.11.11810	19.46	21.29	16.74	29.27	32.69	34.57		0.335		0.747666		0.0964371
Tb927.11.11840	15.19	16.29	9.46	19.05	29.28	23.15		0.343		0.804029		0.460147
Tb927.11.11850	46.17	52.45	43.34	61.63	64.99	77.29		0.391		0.522448		1
Tb927.11.11860	36.79	41.13	32.7	41.81	49.95	50.6		0.341		0.363932		0.23559
Tb927.11.11870	31.72	31.13	22.83	41.94	46.13	51.2		0.339		0.700854		0.273836
Tb927.11.1190	24.69	26.5	20.19	26.56	24.54	27.58		0.344		0.140477		0.0140404
Tb927.11.11900	74.7	79.34	68.24	126.55	144	143.57		0.361		0.897671		0.000597437
Tb927.11.11920	33.24	36.85	28.57	48.75	52.66	55.01		0.377		0.664888		0.301892
Tb927.11.11930	45.95	46.18	37.79	62.65	52.98	62.43		0.358		0.45474		0.748492
Tb927.11.11950	46.68	50.89	44.99	19.11	15.59	19.47		0.342		-1.396		2.52487e-46
Tb927.11.11960	16	14.16	11.52	25.25	24.29	30.75		0.329		0.945865		0.0165634
Tb927.11.1200	30.59	32.59	29.65	42.42	39.45	40.43		0.343		0.397761		0.407751
Tb927.11.12020	29.15	32.59	29.12	75.23	65.06	63.1		0.372		1.16253		4.14656e-05
Tb927.11.12030	28.81	32.37	23.46	25.43	25.56	27.42		0.332		-0.110302		0.000126992
Tb927.11.12040	414.4	344.38	409	118.83	83.3	78.66		0.357		-2.05621		9.95905e-21
Tb927.11.12050	29.05	28.66	24.42	50.83	44.68	49.4		0.344		0.819176		0.0245719
Tb927.11.12060	19.6	22.61	16.57	44.53	38.61	37.87		0.347		1.04173		0.00298941
Tb927.11.12070	31.17	31.45	24.26	48.94	45.19	41.77		0.355		0.645449		0.480813
Tb927.11.12080	19.63	21.62	20.04	41.66	37.86	34.75		0.314		0.898723		0.0542074
Tb927.11.12090	28.41	28.87	24.5	57.23	43.59	43.2		0.368		0.816449		0.1663
Tb927.11.1210	44.54	48.28	38.05	77.47	74.96	80.81		0.396		0.833681		0.0124959
Tb927.11.12110	22.35	24.29	22.48	45.14	49.93	52.86		0.356		1.09774		9.91922e-07
Tb927.11.12150	94.8	103.36	84.86	80.39	86.74	88.51		0.378		-0.14679		5.50702e-10
Tb927.11.12160	17.23	23.29	19.48	14.83	14.47	15.76		0.332		-0.413115		0.000303934
Tb927.11.12170	17.33	15.14	14.59	23.64	23.08	22.2		0.33		0.550421		0.934978
Tb927.11.12180	12.45	13.13	11.48	14.73	21.77	22.43		0.346		0.669139		0.528176
Tb927.11.12190	32.77	35.45	33.03	33.55	33.09	36.32		0.34		0.0241621		0.000128111
Tb927.11.1220	32.02	29.99	24.73	30.48	30.6	29.51		0.351		0.0626544		0.000246594
Tb927.11.12210	111.18	125.7	107.22	189.5	184.48	186.52		0.417		0.703886		0.122394
Tb927.11.12220	46.71	49.34	43.43	41.68	47.03	49.6		0.377		-0.0121528		3.56757e-06
Tb927.11.12230	63.34	67.85	59.05	68.29	70.36	70.96		0.387		0.139887		0.00129532
Tb927.11.12240	36.95	39.29	30.44	70.52	75.82	87.24		0.367		1.13063		5.72315e-08
Tb927.11.12250	26.96	26.66	23.85	37.73	35.16	37.91		0.363		0.516248		0.988106
Tb927.11.12260	26.49	29.91	24.72	35.47	42.94	43.04		0.324		0.582233		0.746191
Tb927.11.12270	24.9	29.57	23.14	26.63	29.28	33.38		0.32		0.202256		0.0321389
Tb927.11.12280	26.32	31.96	26.61	38.83	40.96	42.68		0.344		0.528762		1
Tb927.11.12290	34.35	39.59	35.13	98.14	113.32	111.22		0.321		1.56485		7.64376e-18
Tb927.11.1230	17.67	21.39	14.2	140.66	184.32	195.67		0.404		3.28919		1.23281e-34
Tb927.11.12300	45.28	46.13	39.55	69.62	77.35	77.83		0.35		0.779516		0.127251
Tb927.11.12310	46.15	53.42	38.49	53.24	66.45	70.64		0.357		0.463208		0.71451
Tb927.11.12320	55.72	62.88	48.69	53.52	50.19	53.87		0.358		-0.0862668		5.39908e-08
Tb927.11.12330	22.06	31.76	21.48	34.56	37.57	34.62		0.328		0.503514		1
Tb927.11.12340	31.1	33.38	24.88	64.12	57.89	68.76		0.322		1.09413		2.86775e-05
Tb927.11.12350	30.37	37.77	30.66	31.15	29.97	35.75		0.356		-0.0284611		8.51114e-06
Tb927.11.12360	28.21	22.69	23.81	41.61	38.36	36.28		0.391		0.637857		0.555123
Tb927.11.12370	32.55	35.48	30.22	47.5	35.62	43.9		0.373		0.370526		0.340115
Tb927.11.12380	51.86	58.5	48.66	68.2	78.53	76.94		0.373		0.492164		0.868376
Tb927.11.12390	23.3	24.88	20.04	48.09	50.41	57.59		0.352		1.19411		8.39072e-09
Tb927.11.1240	18.03	16.7	15.27	48.62	39.21	44.78		0.327		1.40719		8.0506e-09
Tb927.11.12400	39.09	43.2	36.13	62.8	68.29	69.38		0.327		0.759474		0.0459212
Tb927.11.12430	31.27	35.03	28.22	43.12	52.55	56.19		0.333		0.68405		0.24849
Tb927.11.12440	69.72	69.26	59.23	56.01	62.33	69.72		0.36		-0.0758367		5.5604e-07
Tb927.11.12450	31.03	36.59	27.38	35.39	37.22	39.37		0.349		0.237242		0.0335743
Tb927.11.12460	35.75	40.69	29.89	47.94	57.74	56.17		0.357		0.606109		0.540189
Tb927.11.12470	17.56	17.69	16.97	36.57	45.59	52.27		0.334		1.36418		4.30655e-07
Tb927.11.12480	41.19	42.29	34.48	63.58	61.88	68.28		0.347		0.715824		0.127217
Tb927.11.12490	30.08	31.98	30.08	28.18	30.35	32.63		0.337		-0.0154267		7.49397e-05
Tb927.11.1250	47.34	47.99	40.72	50.67	58.69	56.98		0.354		0.289998		0.0556805
Tb927.11.12500	29.92	35.43	26.14	73.93	65.84	75.25		0.337		1.23278		9.44027e-08
Tb927.11.12510	28.23	32.11	24.23	47.99	54.16	53.88		0.365		0.883606		0.00249007
Tb927.11.12520	24.24	24.17	23.86	40.73	37.61	38.17		0.365		0.688985		0.399832
Tb927.11.12530	105.18	116.66	95.39	106.96	122.03	132.03		0.396		0.18655		0.00179127
Tb927.11.12570	24.78	24.07	18.25	38.41	42.75	44.71		0.335		0.90755		0.0253672
Tb927.11.12580	27.2	31.96	24.18	119.38	121.08	128.12		0.348		2.1449		3.57209e-46
Tb927.11.12590	45.88	46.35	36.37	84.86	75.98	78.5		0.373		0.896171		0.00585696
Tb927.11.1260	38.2	40.69	38.25	76.86	86.17	93.2		0.347		1.12921		3.50263e-08
Tb927.11.12600	26.62	32.35	25.6	69.18	84.78	88.78		0.363		1.52119		3.80563e-16
Tb927.11.12610	44.49	43.58	36.7	47.07	49.2	45.52		0.354		0.184485		0.0186176
Tb927.11.12620	12.68	13.26	10.39	40.71	41.28	44.45		0.361		1.79922		1.06903e-25
Tb927.11.12630	23.18	24.43	21.7	35.85	32.23	35.14		0.345		0.574587		0.794547
Tb927.11.12640	40.64	48.74	37.77	136.5	156.24	168.55		0.367		1.85914		5.95876e-36
Tb927.11.12650	22.37	23.29	21.32	44.03	42.21	42		0.352		0.937044		0.00196361
Tb927.11.12660	26.29	30.08	25	67.64	61.49	68.05		0.343		1.27694		7.91294e-11
Tb927.11.12670	33	37.03	29.96	63.71	68.88	72.76		0.363		1.03823		0.000264832
Tb927.11.12680	135.76	176.1	128.66	109.91	103.14	111.63		0.406		-0.440189		3.9261e-14
Tb927.11.12690	12.56	14.7	10.63	19.07	20.62	20.33		0.349		0.663626		0.53779
Tb927.11.1270	324.13	339.79	279.31	85.3	72.94	92.39		0.43		-1.91205		2.08148e-98
Tb927.11.12740	35.73	32.24	30.76	36.03	34.78	34.04		0.32		0.0867664		0.00125768
Tb927.11.12750	45.58	47.15	39.7	58.08	53.94	52.34		0.315		0.311629		0.173448
Tb927.11.12760	30.44	29.01	28.77	27.17	26.02	27.69		0.322		-0.125323		4.56809e-06
Tb927.11.12770	28.91	31.02	27.09	41.4	48.67	54.04		0.315		0.727752		0.0956621
Tb927.11.1280	20.12	20.73	20.87	16.53	38.13	42.53		0.339		0.65507		0.835646
Tb927.11.12830	32.95	35.44	26.82	39.06	37.64	41.77		0.332		0.315337		0.112821
Tb927.11.12840	34.38	41.06	35.21	41.11	67.17	71.94		0.337		0.703756		0.564788
Tb927.11.12860	30.69	34.11	28.35	46.08	43.41	43.67		0.413		0.515533		1
Tb927.11.12870	19.14	20.63	17.36	20.76	28.06	29.17		0.276		0.449041		0.616731
Tb927.11.1290	22.38	24.1	22.47	36.3	37.96	36.02		0.343		0.677549		0.335558
Tb927.11.12910	20.62	28.56	21.25	26.02	25.74	29.4		0.32		0.204579		0.131461
Tb927.11.12930	32.67	35.86	27.19	47.67	53.03	54.51		0.367		0.697329		0.200015
Tb927.11.12940	64.93	72.21	49.75	99.39	88.7	93.93		0.342		0.593608		0.583361
Tb927.11.12950	55.01	60.65	46.57	91.87	84.34	104.64		0.397		0.791759		0.0499836
Tb927.11.12970	30.67	35.35	31.92	43.47	45.22	47.24		0.357		0.472894		0.739582
Tb927.11.12980	25.03	25.42	22.8	55.07	58.59	64.67		0.359		1.28365		1.67413e-10
Tb927.11.1300	25.02	25.5	22.99	55.17	52.86	48.19		0.356		1.08757		5.04974e-05
Tb927.11.13010	282.49	249.26	273.16	226.87	174.38	180.62		0.402		-0.468131		3.11863e-08
Tb927.11.13060	37.12	41.85	35.61	61.05	64.98	72.86		0.368		0.795615		0.0240422
Tb927.11.13070	24.21	25.74	22.85	37.85	42.2	42.98		0.339		0.757		0.114394
Tb927.11.13080	31.04	32.99	29.39	35.43	35.1	34.01		0.32		0.162252		0.00715969
Tb927.11.13100	53.56	55.94	52.16	67.5	65.95	67.18		0.313		0.311575		0.114316
Tb927.11.13110	27.88	35.19	28.41	37.17	47.26	51.87		0.384		0.575257		0.802309
Tb927.11.13140	719.25	684.42	666.25	103.28	95.23	78.26		0.362		-2.90282		4.4758e-136
Tb927.11.13150	21.99	19.85	16.67	42.01	38.24	34.97		0.288		0.977636		0.00325154
Tb927.11.13180	124.41	138.12	113.73	107.58	105	110.74		0.391		-0.218767		1.89215e-12
Tb927.11.1320	82.54	88.53	76.86	108.51	94.04	89.64		0.379		0.236974		0.0573296
Tb927.11.13200	40.83	41.91	33.94	117.87	121.12	132.62		0.397		1.67123		6.05904e-23
Tb927.11.13210	38.99	40.87	28.35	57.72	49.79	61.22		0.329		0.640883		0.462111
Tb927.11.13220	40.9	46.33	40.39	78.22	87.13	98.58		0.38		1.0483		1.24094e-05
Tb927.11.13230	129.73	145.84	116.14	160.79	163.67	184.35		0.398		0.377341		0.221655
Tb927.11.13240	66.97	79.94	70	66.96	65.92	59.19		0.355		-0.175464		3.79164e-08
Tb927.11.13250	201.64	227.67	180.64	196.85	212.67	226.21		0.436		0.0597232		1.1468e-05
Tb927.11.13260	44.48	48.08	43.5	90.04	81.08	93.77		0.373		0.96115		0.000231757
Tb927.11.13270	150.68	169.72	132.1	135.73	157.84	162.42		0.343		0.0110844		1.14711e-06
Tb927.11.13280	316.56	354.16	288.39	283.3	296.36	301.56		0.37		-0.122194		2.03815e-09
Tb927.11.13290	92.76	106.63	76.53	184.6	157.36	178.89		0.365		0.916618		0.00147099
Tb927.11.1330	138.24	133.23	130.76	161.37	128.45	141.28		0.35		0.100002		0.00119236
Tb927.11.13300	54.56	55.17	50.04	93.95	83.05	83.31		0.359		0.704234		0.19367
Tb927.11.13310	57.38	63.71	49.6	52.79	45.6	54.61		0.372		-0.157847		1.5964e-07
Tb927.11.13330	27.04	30.81	28.1	58.19	50.28	49.97		0.351		0.882367		0.00838179
Tb927.11.13340	46.57	56.22	42.04	74.09	81.58	90.96		0.362		0.767988		0.0368468
Tb927.11.13350	36.98	43.66	32.79	65.77	63.06	68.08		0.345		0.795734		0.0377656
Tb927.11.13360	61.46	70.61	57.82	57.14	75.14	84.32		0.361		0.189869		0.0116759
Tb927.11.13370	35.5	35.48	31.12	45.71	50.84	52.57		0.36		0.546491		0.939967
Tb927.11.13390	44.99	64.16	49.34	83.74	81.18	88.92		0.341		0.679528		0.289599
Tb927.11.1340	39.43	42.49	36.91	22.69	29.74	31.11		0.354		-0.50836		1.98461e-21
Tb927.11.13400	55.62	70.62	53.14	102.87	117.05	118.3		0.377		0.914943		0.000657868
Tb927.11.13420	31.79	31.41	25.7	62.58	64.28	69.41		0.348		1.14258		8.85365e-07
Tb927.11.13440	27.52	29.57	23.23	35.45	35.46	38.52		0.321		0.446177		0.739582
Tb927.11.13450	73.94	79.92	63.39	191.83	186.19	197.5		0.365		1.40551		2.19233e-14
Tb927.11.13460	24.08	28.58	23.64	40.31	38.75	40.9		0.358		0.652798		0.387714
Tb927.11.13470	58.58	57.37	55	87.11	79.53	88.39		0.395		0.577093		0.769931
Tb927.11.13480	23.15	27.36	24.03	32.62	41.94	39.08		0.339		0.608384		0.717059
Tb927.11.13490	49.82	53.83	42.78	63.45	65.22	69.65		0.363		0.437619		0.624904
Tb927.11.1350	23.71	28.29	21.07	70.14	70.17	72.4		0.329		1.54154		1.77766e-11
Tb927.11.13500	306.84	344.2	287.01	215.28	239.74	256.15		0.398		-0.39947		4.86688e-20
Tb927.11.13510	50.62	60.2	45.22	40.28	43.35	45.62		0.392		-0.271752		1.89719e-05
Tb927.11.13520	67.59	77.64	62.26	132.49	141.41	154.25		0.364		1.04507		9.45298e-07
Tb927.11.13530	28.56	29.43	26.88	49.52	51.85	48.44		0.348		0.819807		0.0794362
Tb927.11.13540	17.19	20.43	17.17	27.35	22.42	29.52		0.323		0.533226		1
Tb927.11.13550	23.36	24.68	21.11	44.17	45.23	47.03		0.348		0.98036		0.000361054
Tb927.11.13560	31.52	33.7	28.7	34.84	36.73	41.08		0.353		0.262343		0.0589816
Tb927.11.13570	140.06	150.79	132.23	154.84	153.65	153.11		0.425		0.125713		0.000850974
Tb927.11.13580	35.76	39.91	28.63	53.12	54.55	58.87		0.352		0.67513		0.340275
Tb927.11.13590	37.43	50.13	40.15	50.48	45.74	57.33		0.338		0.265837		0.349916
Tb927.11.1360	28.66	30.12	25.98	40.04	46.57	51.92		0.35		0.708743		0.188791
Tb927.11.13600	56.03	60.96	51.27	58.01	57.03	65.44		0.382		0.101147		0.00108103
Tb927.11.13610	99.97	100.44	72.99	162.95	119.93	129.3		0.406		0.592261		0.739137
Tb927.11.13620	25.36	27.22	26.74	50.74	44.63	48.01		0.366		0.854087		0.0783789
Tb927.11.13640	11.48	12.79	10.63	59.15	77.53	84.31		0.374		2.66268		2.57794e-23
Tb927.11.13650	203.69	188.26	166	81.18	69.74	78.06		0.362		-1.28491		6.13228e-48
Tb927.11.13660	35.16	28.22	21.72	34.44	25.61	36.7		0.388		0.185103		0.234129
Tb927.11.13670	49.87	54.76	47.34	57.83	71.87	79.91		0.37		0.463921		0.625462
Tb927.11.13680	25.16	21.92	22.48	40.86	33.65	35.43		0.36		0.660387		0.514935
Tb927.11.13690	48.54	46.82	45.7	73.88	55.34	61.81		0.377		0.43749		0.663187
Tb927.11.13700	21.56	25.2	21.73	43.02	47.32	46.92		0.361		1.00295		0.000103594
Tb927.11.13710	77.38	71.35	74.39	114.69	72.18	74.98		0.371		0.230921		0.342502
Tb927.11.13730	64.75	67.48	58.55	70.94	60.83	62.82		0.35		0.0285276		5.1816e-06
Tb927.11.13750	64.63	70.63	57.81	87.38	88.18	82.95		0.349		0.421096		0.64502
Tb927.11.13760	41.81	43.82	38.83	60.27	56.74	52.69		0.332		0.447304		0.741852
Tb927.11.13780	134.07	123.1	121.27	225.91	164.65	152.37		0.382		0.520702		1
Tb927.11.13790	82.09	86.57	80.42	54.78	45.49	46.65		0.38		-0.761578		1.126e-25
Tb927.11.1380	21.99	24.38	22.56	37.7	64.54	68.43		0.359		1.30801		0.0153546
Tb927.11.13800	58.52	46.1	70.74	71.94	37.33	51.98		0.301		-0.121021		0.146398
Tb927.11.13810	39.65	41.34	35.66	48.27	46.1	47.05		0.378		0.2778		0.0561368
Tb927.11.13820	36.72	37.1	32.01	58.99	54.26	69.21		0.387		0.785832		0.0860936
Tb927.11.13830	61.68	62.68	58.31	61.26	65.45	52.93		0.324		-0.0241311		7.984e-05
Tb927.11.13840	39.88	38.83	33.48	60.85	54.97	54.4		0.346		0.601456		0.596147
Tb927.11.13850	22.34	23.04	23.65	44.42	35.08	46.19		0.322		0.864574		0.0484934
Tb927.11.13860	23.77	22.31	21.97	38.95	29.88	31.06		0.328		0.553745		0.925702
Tb927.11.13870	67.42	90.07	73.56	80.43	77.24	81.41		0.359		0.0492884		0.000622557
Tb927.11.13880	23.73	22.41	23.02	30.11	25.78	28.89		0.351		0.293786		0.101994
Tb927.11.13890	70.4	75.43	59.76	51.82	44.99	48.46		0.339		-0.501033		2.86627e-13
Tb927.11.1390	39.36	37.73	30.89	55.74	55.73	57.28		0.362		0.644123		0.399832
Tb927.11.13900	70.8	61.46	66.48	93.77	73.44	79.25		0.406		0.310471		0.29796
Tb927.11.13910	36.35	41.82	30.32	76.8	68.58	67.43		0.321		0.972004		0.00202023
Tb927.11.13930	51.09	60.75	47.99	28.26	19.36	27.35		0.39		-1.09215		1.66635e-28
Tb927.11.13940	25.03	23.39	22.21	54.18	57.47	63.92		0.375		1.31369		6.1968e-12
Tb927.11.13950	23.58	22.91	21.53	38.78	35.05	34.79		0.329		0.675259		0.340573
Tb927.11.13960	82.75	93.29	75.23	107.63	86.99	114.88		0.35		0.300701		0.185487
Tb927.11.13970	77.38	79.56	68.42	97.42	93.81	103.69		0.371		0.388092		0.299072
Tb927.11.13990	39.31	37.92	40.02	45.13	42.99	49.26		0.353		0.228584		0.0436818
Tb927.11.1400	34.12	39.59	29.36	53.32	65.32	67.74		0.345		0.854623		0.00634744
Tb927.11.14010	45.54	46.16	41.63	45.4	36.1	41.36		0.3		-0.117986		6.92326e-05
Tb927.11.14030	23.28	23.5	18.33	27.57	17.07	28.62		0.319		0.170147		0.124779
Tb927.11.14040	26.14	28.7	24.42	38.82	43.23	49.02		0.306		0.725673		0.123119
Tb927.11.14050	23.52	26.22	24.06	34.11	30.18	21.05		0.364		0.209601		0.238505
Tb927.11.14090	246.34	288.81	227.39	177.29	208.91	221.38		0.406		-0.327739		1.75459e-16
Tb927.11.1410	46.35	52.66	44.11	50.56	56.91	55.21		0.363		0.184812		0.0157141
Tb927.11.14100	156.43	178.64	138.43	123.62	133.31	139.02		0.372		-0.258046		4.54705e-14
Tb927.11.14110	24.96	24.45	22.28	34.16	30.28	32.89		0.338		0.441113		0.607881
Tb927.11.14120	134.25	147.59	125.4	131.1	125.28	138.18		0.383		-0.0456346		1.08068e-07
Tb927.11.14140	55.36	57.17	49.6	89.65	79.52	81.91		0.345		0.630996		0.41431
Tb927.11.14150	20.45	23.93	26.2	45.81	35.25	45.26		0.323		0.839752		0.170326
Tb927.11.14160	74.03	76.83	68.38	37.51	41.34	42.78		0.33		-0.850012		1.00658e-39
Tb927.11.14170	42.37	45.8	41.34	49.94	47.99	51.94		0.329		0.210648		0.0142801
Tb927.11.14180	20.94	24.54	18.52	33.33	35.49	39.52		0.339		0.759422		0.0785731
Tb927.11.14190	133.17	150.24	120.74	137.37	155	168.03		0.378		0.187997		0.00185214
Tb927.11.1420	20.42	22.57	18.81	37.29	49.03	51.48		0.34		1.1569		2.88961e-05
Tb927.11.14200	97.5	107.09	86.85	151.68	155.05	167.9		0.403		0.703604		0.164499
Tb927.11.14210	31.16	33.7	27.3	37.04	47.37	48.32		0.344		0.526282		1
Tb927.11.14220	93.38	119.53	86.27	23.76	106.43	102.3		0.371		-0.363845		0.0273609
Tb927.11.14230	39.76	39.94	32.33	54.72	49.56	54.73		0.352		0.505232		0.948738
Tb927.11.14240	28.19	26.18	24.96	29.99	31.94	36.13		0.327		0.305798		0.0844534
Tb927.11.14250	296.07	346.66	281.6	189.97	219.2	228.54		0.414		-0.535508		9.08557e-25
Tb927.11.14260	21.77	29.79	20.94	42.1	38.3	45.22		0.332		0.793013		0.0792366
Tb927.11.14270	37.61	39.93	33.23	40.89	38.77	42.18		0.338		0.137421		0.00225056
Tb927.11.14280	22.42	20.31	18.21	45.1	39.8	41.68		0.363		1.05459		0.000352787
Tb927.11.14290	33.55	39.86	30.94	73.46	74.96	74.43		0.367		1.09464		2.11493e-05
Tb927.11.1430	153.14	174.47	130.08	161.34	189.55	199.44		0.404		0.265926		0.0186777
Tb927.11.14300	154.3	172.85	135.3	203.56	212.42	238.82		0.396		0.501757		0.89893
Tb927.11.14320	156.98	175.78	134	124.34	119.98	122.49		0.364		-0.347648		1.87313e-13
Tb927.11.14330	46.6	54.46	45.67	64.52	92.95	96.46		0.352		0.791267		0.189475
Tb927.11.14340	32.91	35.82	28.9	45.16	48.6	49.41		0.357		0.552333		0.867533
Tb927.11.14370	50.22	56.16	42.36	58.56	68.56	70.74		0.341		0.411687		0.385804
Tb927.11.14380	35.9	42.11	32.39	48.93	50.31	50.58		0.346		0.44049		0.607881
Tb927.11.14390	36.83	32.62	27.53	50	41	42.07		0.322		0.456426		0.76939
Tb927.11.1440	46.59	44.25	40.05	70.75	72.62	74.41		0.3		0.734517		0.194949
Tb927.11.14400	17.11	20.34	17.37	39.56	39.24	38.87		0.31		1.10197		0.00083257
Tb927.11.14410	10.73	10.11	10.25	24.36	23.02	25.97		0.317		1.23835		9.85425e-07
Tb927.11.14420	20.04	19.79	19.53	28.03	26.17	25.06		0.316		0.417102		0.579273
Tb927.11.14430	57.8	64.39	54.81	94.48	87.43	81.09		0.371		0.571313		0.756134
Tb927.11.14440	27.02	28.22	27.72	39.51	43.37	44.31		0.377		0.616497		0.582192
Tb927.11.14450	32.2	34.56	28.84	49.32	53.52	56.93		0.375		0.740914		0.108961
Tb927.11.14460	33.14	33.33	28.75	115.85	115.44	105.63		0.371		1.82307		2.878e-24
Tb927.11.14470	22.98	24.37	22.83	36.92	38.52	37.79		0.347		0.690124		0.253557
Tb927.11.14480	32.94	34.5	31.53	48.87	47.81	46.72		0.355		0.534982		0.986013
Tb927.11.14490	108.84	116.66	90.89	127.99	137.75	140.98		0.342		0.362332		0.276697
Tb927.11.14500	26.41	28.7	22.88	32.57	28.72	29.79		0.342		0.223845		0.0330629
Tb927.11.14520	69.56	82.01	62.35	112.26	89.37	115.62		0.37		0.568549		0.768716
Tb927.11.14530	25.34	28.34	23.89	56.91	56.29	56.38		0.325		1.1284		1.61596e-06
Tb927.11.14540	18.84	20.56	18.64	58.99	62.73	61.93		0.372		1.66184		1.10185e-17
Tb927.11.14550	34.45	37.14	30.54	48.27	46.53	52.24		0.324		0.525802		1
Tb927.11.14560	36	38.56	35.06	40.93	46.57	46.99		0.34		0.294988		0.0483695
Tb927.11.14570	25.83	27.04	25.32	36.25	33.11	34.22		0.339		0.405689		0.496964
Tb927.11.14580	37.26	39.07	32.41	52.06	51.08	49.16		0.388		0.486033		0.836905
Tb927.11.14590	62.34	69.16	58.49	106.86	101.66	105.39		0.384		0.724428		0.0933783
Tb927.11.1460	23.49	24.98	20.83	45.14	50.65	52.23		0.365		1.09486		5.35799e-07
Tb927.11.14630	11.94	12.85	10.87	30.92	35.08	42.51		0.38		1.60545		2.78943e-13
Tb927.11.14640	18.69	22.77	17.19	60.23	64.97	64.32		0.33		1.69215		1.22878e-19
Tb927.11.14650	23.1	25.36	20.81	36.46	40.55	39.01		0.342		0.744071		0.0902787
Tb927.11.14660	54.93	55.08	43.44	72.59	62.8	59.26		0.363		0.343114		0.405588
Tb927.11.14670	15.56	10.99	11.12	31.35	30.08	38.89		0.341		1.41312		0.000198934
Tb927.11.14680	25.13	26.65	24.01	44.23	64.37	67.7		0.339		1.21795		0.00134821
Tb927.11.14690	41.89	45.98	33.11	93.33	89.45	89.04		0.368		1.16788		3.19402e-07
Tb927.11.14700	63.24	66.39	54.95	40.14	31.81	34.9		0.376		-0.788659		1.39563e-26
Tb927.11.14710	36.07	34.55	27.88	38.5	33.32	36.73		0.39		0.140164		0.0134518
Tb927.11.14720	23.04	25.18	22.32	56.63	54.54	61.34		0.357		1.29017		4.81872e-08
Tb927.11.14740	22.71	25.67	22.07	40.35	32.41	35.84		0.335		0.624352		0.506987
Tb927.11.14760	36.66	41.75	34.64	28.21	25.1	31.21		0.334		-0.419596		4.21831e-14
Tb927.11.14770	29.71	28.08	26.84	69.9	66.44	70.88		0.384		1.29192		2.57296e-09
Tb927.11.14780	135.6	140.98	117.37	59.6	61.1	69.27		0.37		-1.05224		2.04844e-48
Tb927.11.14790	27.65	28.48	23.55	37.12	35.65	39.78		0.326		0.498277		0.899555
Tb927.11.14800	45.37	47.14	37.78	57.32	55.58	56.82		0.361		0.38143		0.343273
Tb927.11.14810	20.02	20.56	17.43	19.9	24.39	22.3		0.317		0.199004		0.0967811
Tb927.11.14820	22.2	25.58	19.65	54.94	50.61	54.39		0.304		1.24607		8.32978e-09
Tb927.11.14830	30.1	31.59	27.98	51.64	42.5	49.4		0.377		0.678756		0.352454
Tb927.11.14840	118.67	124.14	105.8	331.32	283.61	287.38		0.359		1.37201		1.0088e-10
Tb927.11.14850	19.84	21.2	19.63	20.12	18.82	21.27		0.337		-0.0109802		3.18571e-05
Tb927.11.14860	25.55	28.5	25.26	31.53	30.8	33.49		0.366		0.272824		0.0850323
Tb927.11.14870	52.15	49.14	48.23	42.22	32.93	40.41		0.352		-0.371696		3.07434e-11
Tb927.11.14880	194.97	208.37	166.95	227.56	223.34	236.34		0.431		0.269118		0.022471
Tb927.11.14890	29.18	33.26	25.15	35.46	40.28	35.37		0.361		0.343151		0.202458
Tb927.11.14900	69.19	80.14	63.99	165.18	150.31	158.38		0.361		1.15147		1.16099e-07
Tb927.11.14910	30.49	31.93	25.91	43.77	50.13	51.83		0.34		0.722322		0.208994
Tb927.11.14920	28.46	32.37	26.76	46.31	66.32	70.29		0.335		1.06237		0.00823601
Tb927.11.14930	57.67	62.04	50.38	57.44	61.54	66.49		0.359		0.124888		0.000477532
Tb927.11.14940	35.23	37.66	32.66	43.41	43.05	42.61		0.336		0.290227		0.0954387
Tb927.11.14960	56.13	61.62	51.94	35.33	35.28	36.59		0.359		-0.662597		4.24182e-26
Tb927.11.14970	65.45	67.57	57.87	89.03	93.53	102.34		0.357		0.577714		0.723117
Tb927.11.14980	54.53	62.75	48.19	44.58	47.78	47.09		0.377		-0.246822		8.41811e-10
Tb927.11.14990	32.03	34.42	29.83	38.72	37.8	38.95		0.342		0.26221		0.0464761
Tb927.11.15000	28.83	36.25	30.43	44.09	44.06	47.31		0.349		0.504143		0.941044
Tb927.11.15010	40.97	45.27	39.23	13.44	21.79	26.94		0.381		-1.01305		4.24619e-30
Tb927.11.15030	58.67	60.85	54.47	60.06	59.66	61.45		0.405		0.0583397		0.000101399
Tb927.11.15050	46.97	50.64	43.18	67.56	72.59	74.82		0.334		0.61059		0.565156
Tb927.11.15060	47.71	50.74	37.71	44.83	37.15	36.13		0.361		-0.205172		2.45449e-07
Tb927.11.15070	25.45	28.04	22.96	29.45	31.19	34.45		0.323		0.314777		0.098194
Tb927.11.15080	193.61	212.85	166.06	131.41	126.87	141.18		0.335		-0.519275		2.85194e-18
Tb927.11.15090	42.06	40.96	35.47	56.05	48.17	57.45		0.352		0.448287		0.626199
Tb927.11.15100	122.94	134.56	115.01	118.21	133.92	139.17		0.396		0.070996		1.39528e-05
Tb927.11.15110	30.91	27.02	26.31	36.81	41.73	41.61		0.306		0.512259		0.932545
Tb927.11.15120	61.15	63.51	54.59	41.83	56.83	63.71		0.338		-0.142688		1.95149e-08
Tb927.11.15130	84.57	100.76	80.8	83.91	79.37	85.83		0.38		-0.0953482		1.0325e-06
Tb927.11.15140	79.74	84.61	69.07	109.91	114.38	127.16		0.353		0.590391		0.63285
Tb927.11.15150	93.65	87.89	80.42	106.23	92.58	104.44		0.363		0.211161		0.00837399
Tb927.11.15160	27.46	30.11	27.93	30.18	39.12	42.11		0.323		0.381882		0.291861
Tb927.11.15170	37.62	40.8	28.66	40.72	37.98	43.78		0.328		0.193857		0.076276
Tb927.11.15180	112.6	126.09	106.03	185.79	167.89	160.28		0.378		0.576231		0.703315
Tb927.11.15190	70.52	75.43	61.75	88.47	89.6	98.69		0.418		0.414134		0.4024
Tb927.11.15210	69.23	66.22	59.2	112.29	114.65	120.56		0.369		0.836131		0.0110974
Tb927.11.15220	97.92	118.2	90.47	131.68	132.78	154.17		0.381		0.449365		0.630769
Tb927.11.15230	68.5	80.37	72.74	145.7	143.01	137		0.382		0.941848		0.000523352
Tb927.11.15240	35.07	39.13	31.83	56.57	60.77	58.98		0.376		0.733724		0.0858746
Tb927.11.15250	28.7	35.32	28.28	45.29	44.19	49.22		0.345		0.587565		0.67427
Tb927.11.15270	20.57	20.36	17.67	45.19	45.87	46.95		0.325		1.2358		7.20283e-05
Tb927.11.15280	22.55	23.5	16.99	28.48	24.73	22.79		0.323		0.269732		0.219187
Tb927.11.15290	34.52	30.66	29.11	60.62	65.28	63.72		0.382		1.00793		0.000967621
Tb927.11.15300	24.77	26.36	20.7	48.2	47.1	46.92		0.318		0.985466		0.00242302
Tb927.11.15310	21.68	24.38	20.46	41.99	46.25	45.03		0.331		1.00249		0.000200154
Tb927.11.15320	13.95	18.09	14.76	16.28	22.13	20.58		0.321		0.333962		0.265384
Tb927.11.15330	10.15	11.76	10.03	18.99	29.75	36.14		0.341		1.41006		0.00766974
Tb927.11.15340	22.84	20.67	19.1	30.54	29.1	31.46		0.333		0.541058		0.965616
Tb927.11.15350	32.93	33.91	28.96	41.11	40.77	42.83		0.384		0.38048		0.439501
Tb927.11.15360	63.62	70.17	58.62	61.9	51.31	57.34		0.371		-0.173989		1.05671e-06
Tb927.11.15370	122.73	137.61	120.65	63.39	75.06	79.16		0.352		-0.808008		2.33647e-37
Tb927.11.1540	71.71	76.57	69.09	99.44	99.6	104.76		0.385		0.482969		0.769931
Tb927.11.15400	16.59	17.3	13.92	35.22	39.98	42.81		0.332		1.30352		5.06321e-11
Tb927.11.15410	16.25	16.89	15.03	24.01	19.4	22.16		0.354		0.444901		0.677154
Tb927.11.15420	100.22	111.99	77.53	90.31	77	84.48		0.375		-0.202538		4.07716e-08
Tb927.11.15430	28.17	32.83	26.49	33.13	34.99	40.04		0.364		0.305977		0.0952589
Tb927.11.15440	31	27.18	25.96	74.74	67.26	69.5		0.39		1.32979		2.28777e-07
Tb927.11.15450	48.05	57.97	48.08	52.66	78.57	78.47		0.345		0.44446		0.70303
Tb927.11.15460	42.83	48.27	39.29	60.38	57.74	64.16		0.368		0.483323		0.791424
Tb927.11.15470	25.32	27.33	24.73	38.28	35.11	48.69		0.348		0.657794		0.415187
Tb927.11.15480	114.87	110.81	91.46	77.12	85.07	85.22		0.413		-0.358216		1.40792e-12
Tb927.11.15500	68.04	74.42	56.66	72.38	58.99	69.07		0.399		0.00953231		9.52645e-05
Tb927.11.15510	49.65	47.5	40.56	40.7	34.57	37.34		0.348		-0.290298		1.689e-07
Tb927.11.15520	19.15	20.2	18.28	30.97	30.56	34.69		0.32		0.739517		0.153976
Tb927.11.15530	24.41	24.45	23.9	16.44	13.16	13.35		0.355		-0.760487		1.76451e-14
Tb927.11.15560	40.91	44.84	39.06	65.65	71.56	69.6		0.391		0.728572		0.132469
Tb927.11.15570	12.68	12.4	11.73	28.35	28.35	32.72		0.334		1.2805		9.93102e-07
Tb927.11.15580	33.25	37.65	29.23	56.02	58.5	56.65		0.355		0.773556		0.0788745
Tb927.11.15590	17.85	24.82	23.17	56.62	55.21	63.74		0.338		1.41501		3.99376e-08
Tb927.11.1560	112.05	117.27	92.05	113.76	118	116.85		0.403		0.117379		0.000817566
Tb927.11.15600	18.45	19.46	17.8	34.18	33.03	36.25		0.336		0.893065		0.00769625
Tb927.11.15610	15.52	18.37	14.78	33.1	36.3	39.92		0.339		1.16745		9.35097e-08
Tb927.11.15620	23.62	26.23	23.2	32.02	27.39	34.77		0.303		0.366536		0.293136
Tb927.11.15630	42.84	44.67	35.46	54.98	57.72	60.44		0.352		0.493633		0.912824
Tb927.11.15640	45.62	53.16	44.06	58.02	54.78	55.92		0.382		0.240231		0.0330672
Tb927.11.15650	32.71	32.81	33.09	51.94	42.49	51.77		0.346		0.568137		0.840157
Tb927.11.15660	47.54	46.83	41.2	62.78	60.77	67.57		0.337		0.495441		0.865096
Tb927.11.15680	78.66	91.2	72.08	95.88	86.68	91.53		0.386		0.18		0.0330672
Tb927.11.15690	23.26	24.4	23.81	47.43	52.12	56.81		0.363		1.12946		6.047e-07
Tb927.11.1570	77.8	81.58	67.36	47.02	61.53	63.2		0.373		-0.400729		7.71282e-17
Tb927.11.15700	69.03	67.99	62.93	65.06	60.98	61.72		0.377		-0.0907495		0.000165377
Tb927.11.15710	38.21	44.21	38.38	28.51	32.07	32.92		0.346		-0.369582		1.14095e-11
Tb927.11.15730	19.37	22.48	20.35	23.29	40.74	40.02		0.333		0.74229		0.498649
Tb927.11.15740	24.1	21.06	19.54	50.89	53.96	50.62		0.334		1.2648		1.0681e-08
Tb927.11.15760	40.16	44.34	37.17	91.84	87.3	96.88		0.359		1.1818		1.24594e-07
Tb927.11.15770	38.75	41.75	33.12	41.71	35.37	45.3		0.362		0.107151		0.00172488
Tb927.11.15790	21.61	23.08	20.37	66.17	75.44	78.96		0.322		1.76139		2.55048e-20
Tb927.11.15800	40.21	43.11	32.57	67.13	82.98	90.67		0.34		1.05496		7.36499e-05
Tb927.11.15810	66.44	70.33	73.73	63.14	57.54	60.15		0.363		-0.219186		1.08451e-07
Tb927.11.15820	82.17	94.03	76.01	74.75	77.84	81.94		0.372		-0.104853		6.56788e-08
Tb927.11.15830	21.01	22.93	20.29	19.31	19.2	21.76		0.334		-0.0918072		8.55597e-08
Tb927.11.15850	41.29	43.53	37.44	103	98.57	104.06		0.387		1.32183		1.04877e-13
Tb927.11.15870	25.12	29.17	23.76	123.46	119.67	136.05		0.367		2.28041		5.6783e-53
Tb927.11.15890	14.47	15.34	13.22	19.94	20.54	21.35		0.303		0.522964		1
Tb927.11.1590	32.14	31.84	24.42	36.74	39.38	38.41		0.327		0.373607		0.509396
Tb927.11.15920	69.19	77.92	67.01	102.98	91.25	94.37		0.348		0.430652		0.674803
Tb927.11.15930	34.09	23.51	22.6	42.68	43.06	40.08		0.418		0.649687		0.632028
Tb927.11.15940	39.61	47.3	38.31	36.03	40.63	45.12		0.336		-0.0401878		1.01659e-06
Tb927.11.15970	33.94	35.12	29.91	58.39	62.35	66.95		0.332		0.923289		0.000446358
Tb927.11.15980	62.77	68.22	55.79	67.28	82.95	85.51		0.335		0.335857		0.154207
Tb927.11.15990	50.86	57.29	44.88	60.59	65.67	70.58		0.324		0.363209		0.187414
Tb927.11.160	53.21	53.05	46.96	50.39	37.1	42.47		0.332		-0.237537		8.67557e-10
Tb927.11.1600	28.97	32.26	29.1	32.81	24.74	26.02		0.341		-0.11222		8.83083e-05
Tb927.11.16000	21.4	23.44	19.65	58.87	56.59	59.54		0.335		1.44021		3.75987e-10
Tb927.11.16010	30.1	31.16	29.04	50.98	58.03	60.38		0.318		0.907551		0.000994324
Tb927.11.16020	73.59	79.06	68.38	54.7	55.74	57.41		0.407		-0.39707		1.2351e-14
Tb927.11.16030	68.38	74.95	65.49	117.14	114.22	112.89		0.384		0.721197		0.126887
Tb927.11.16040	36.75	41.63	34.22	50.12	47.21	50.14		0.39		0.389215		0.345826
Tb927.11.16050	50.92	54.32	44.32	57.46	61.94	60.43		0.366		0.265909		0.0443484
Tb927.11.16060	25.85	25.47	21.04	44.56	45.11	48.12		0.332		0.929207		0.0021095
Tb927.11.16070	31.78	36.55	36.12	36.23	35.27	36.3		0.293		0.0455447		0.00322066
Tb927.11.16080	104.75	130.81	95.09	120.85	110.59	116.23		0.407		0.0724137		0.000145133
Tb927.11.16090	62.45	71.61	59.7	81.08	89.69	88.15		0.388		0.418236		0.40342
Tb927.11.1610	22.14	22.98	20.31	42.64	47.45	48.03		0.367		1.0779		6.43782e-06
Tb927.11.16100	26.63	30.29	27.02	48.79	52.8	54.98		0.333		0.899377		0.00131764
Tb927.11.16110	53.24	58.5	47.28	96.22	99.1	107.04		0.363		0.927059		0.000458364
Tb927.11.16120	23.06	25.67	20.42	35.01	35.49	43.82		0.36		0.725277		0.181536
Tb927.11.16130	1525.71	1602.85	1367.7	955.56	814.93	882.23		0.415		-0.761253		1.53611e-36
Tb927.11.16140	24.37	23.18	21.03	44.2	39.79	43.2		0.357		0.891125		0.00556673
Tb927.11.16150	156.09	131.77	114.38	178.17	139.68	139.11		0.399		0.184011		0.123636
Tb927.11.16160	89.91	81.73	83.12	135.88	113.64	113.69		0.377		0.511665		1
Tb927.11.1620	74.22	83.89	71.84	79.44	75.98	72.9		0.398		-0.010263		3.78245e-05
Tb927.11.16210	40.79	47.08	41.11	56.89	60.48	61.58		0.368		0.472409		0.720118
Tb927.11.16220	72.2	71.18	64.72	42.89	32.54	39.5		0.41		-0.856522		1.74814e-21
Tb927.11.16230	34.49	38.22	33.4	69.89	68.45	72.86		0.35		0.993049		4.95731e-05
Tb927.11.16240	15.56	15.88	14.93	40.14	43.71	45.88		0.307		1.48425		1.49652e-15
Tb927.11.16250	23.99	26	21.41	52.1	60.48	59.63		0.356		1.27017		4.77317e-09
Tb927.11.16270	55.23	56.87	57.47	68.98	55.67	64.22		0.358		0.155513		0.00423552
Tb927.11.16290	34.69	34.06	34.55	51.52	50.13	47.66		0.346		0.531471		1
Tb927.11.1630	41.97	46.73	39.97	43.84	49.17	53.56		0.349		0.187914		0.0055767
Tb927.11.16300	52.61	58.12	56.45	39.31	38.23	43.64		0.351		-0.464251		6.78263e-14
Tb927.11.16310	18.05	19.14	17.99	40.95	45.52	50.6		0.362		1.3127		9.89928e-12
Tb927.11.16320	22.25	21.86	19.33	40.26	33.69	40.61		0.368		0.852639		0.065646
Tb927.11.16330	35.56	41.18	33.24	62.17	68.43	75.72		0.351		0.907642		0.00105492
Tb927.11.16340	33.95	37.15	32.8	60.22	57.19	63.48		0.35		0.799917		0.0186444
Tb927.11.16350	59.32	56.27	55.63	73.77	65.29	66.85		0.322		0.266163		0.040191
Tb927.11.16360	18.71	18.9	17.34	41.78	48.54	47.24		0.329		1.32387		6.39037e-12
Tb927.11.16370	34.95	39.82	31.28	56.88	54.81	61.3		0.36		0.705944		0.170326
Tb927.11.16380	21.6	21.7	19.59	25.75	24.2	23.97		0.331		0.233134		0.104641
Tb927.11.1640	37.73	38.66	33.53	63.39	61.29	59.07		0.353		0.74129		0.11654
Tb927.11.16400	99.25	115.06	87.21	127.68	142.8	150.72		0.382		0.482252		0.802693
Tb927.11.16410	43.6	50.55	43.64	62.46	56.28	61.73		0.342		0.389288		0.354423
Tb927.11.16420	29.01	34.28	24.54	34.89	30.33	33.29		0.34		0.165556		0.0464727
Tb927.11.16430	55.77	69.55	60.28	163.2	111.28	131.46		0.358		1.12907		0.0132944
Tb927.11.16450	51.21	51.66	43.34	62.81	45.7	51.62		0.369		0.131202		0.0207786
Tb927.11.16460	45.9	46.97	41.02	55.99	61.63	63.95		0.383		0.439478		0.54225
Tb927.11.16470	34.06	38.71	31.63	35.01	50.99	54.85		0.377		0.432038		0.645715
Tb927.11.16480	68	61.61	48.99	31.52	26.48	25.23		0.372		-1.10156		4.63332e-20
Tb927.11.16490	29.77	33.83	28.29	46.29	46.57	48.02		0.336		0.616487		0.572937
Tb927.11.1650	63.69	57.11	49.71	58.93	55.7	57.2		0.328		0.0111256		0.00025641
Tb927.11.16500	28.28	25.86	24.6	32.21	26.3	28.76		0.355		0.148389		0.0141191
Tb927.11.16510	329.47	336.56	287.73	150.07	131.09	132.37		0.396		-1.20563		9.44239e-57
Tb927.11.16520	33.66	30.48	30.83	43.68	38.47	43.02		0.347		0.398345		0.501783
Tb927.11.16530	28.78	32.14	27.49	28.32	33.66	37.88		0.328		0.175697		0.00431893
Tb927.11.16550	40.4	50.75	40.21	27.83	93.37	100.05		0.358		0.752151		0.744857
Tb927.11.16560	30.35	30.44	25.69	49.15	52.33	54.34		0.345		0.849442		0.00862448
Tb927.11.16570	99.53	96.85	99.89	41.3	38.56	36.45		0.336		-1.34894		1.35099e-43
Tb927.11.16580	14.69	18.4	16.91	30.39	29.27	35.23		0.318		0.924328		0.00814516
Tb927.11.16590	15.8	14.36	15.75	32.56	29.97	32.46		0.331		1.04897		0.000862438
Tb927.11.16600	27.49	30.87	23.39	43.08	42.27	42.99		0.333		0.65068		0.439044
Tb927.11.16610	68.35	73.03	64.2	68.46	63.15	72.77		0.346		-0.00844589		8.81521e-07
Tb927.11.16620	22.46	25.68	21.72	24.92	22.4	25.95		0.297		0.068756		0.000489581
Tb927.11.16640	31.18	40.01	28.85	36.12	46.3	48.67		0.374		0.389981		0.426732
Tb927.11.16650	20.17	21.31	18.54	32.74	32.09	37.12		0.297		0.764347		0.082137
Tb927.11.16660	26.71	28.24	25.13	29.79	36.7	40.91		0.321		0.42348		0.388418
Tb927.11.16670	51	54.05	41.68	57.24	57.28	59.65		0.358		0.247332		0.0288614
Tb927.11.16680	19.11	21.37	20.07	24.18	23.02	26.94		0.333		0.292125		0.129193
Tb927.11.1670	41.6	43.85	39.19	42.08	40.57	43.28		0.359		0.0148549		3.4874e-05
Tb927.11.16700	23.67	24.82	21.06	43.74	42.22	50.03		0.336		0.967378		0.000209533
Tb927.11.16710	59.61	62.29	51.36	24.08	22.34	20.25		0.391		-1.37783		4.32097e-31
Tb927.11.16720	22.47	28.49	26.65	17.11	32.97	34.73		0.358		0.127992		0.178808
Tb927.11.16730	362.6	417.55	362.77	175.41	199.26	210.92		0.418		-0.964762		2.39234e-48
Tb927.11.16750	79.96	78.74	62.9	99.36	96.46	89.72		0.388		0.365735		0.305602
Tb927.11.16760	281.05	334.98	258.36	203.77	204.31	223.64		0.394		-0.468992		4.70367e-22
Tb927.11.16770	63.58	67.71	59.01	69.15	66.33	70.17		0.351		0.111916		0.0022578
Tb927.11.16790	17.79	20.46	15.45	14.89	44.02	46.1		0.342		0.967533		0.455019
Tb927.11.1680	32.8	34.36	29.99	44.42	55.42	55.87		0.343		0.680576		0.257977
Tb927.11.16800	25.4	27.07	22.46	46.86	42.7	48.75		0.323		0.88429		0.00402442
Tb927.11.16810	67.96	77.31	61.38	92.6	103.35	109.15		0.41		0.562093		0.796559
Tb927.11.16820	30.08	28.65	27.77	11.54	21.1	20.93		0.298		-0.691275		8.23792e-13
Tb927.11.16830	60.27	61.4	56.06	73.39	72.68	79.41		0.395		0.343312		0.152515
Tb927.11.16840	26.02	27.58	22.68	23.81	25.07	28.66		0.345		0.0236359		5.55727e-05
Tb927.11.16850	38.81	37.77	32.56	42.14	51.07	53.85		0.343		0.430225		0.501079
Tb927.11.16860	28.96	33.04	25.39	33.48	32.15	34.39		0.314		0.194748		0.0216643
Tb927.11.16870	99.08	119.23	86.45	162.02	155.38	175.25		0.405		0.692889		0.206073
Tb927.11.16880	34.17	43.29	32.88	52.26	53.25	55.4		0.366		0.544298		0.911603
Tb927.11.1690	97.42	101.19	87.28	70.13	58.87	58.13		0.339		-0.611419		2.99219e-17
Tb927.11.16910	24.45	25.25	20.42	44.07	47.67	50.84		0.345		1.02387		2.88577e-05
Tb927.11.16920	28.6	30.24	27.32	24.95	24.76	25.36		0.328		-0.198782		5.21283e-10
Tb927.11.16930	40.58	40.3	34.96	34.43	33.62	37.37		0.339		-0.135985		5.46887e-08
Tb927.11.16940	16.88	15.46	13.56	20.33	16.77	16.57		0.32		0.225622		0.0619084
Tb927.11.16950	50.3	44.04	44.19	36.77	41.86	38.98		0.319		-0.236188		0.000620302
Tb927.11.16960	30.83	30.46	30.65	46.65	47.42	47.73		0.311		0.625093		0.498049
Tb927.11.16980	54.71	66.23	49.7	79.45	79.2	82.77		0.411		0.500589		0.938028
Tb927.11.16990	28.4	33.43	26.3	50.56	52.52	56.96		0.352		0.860727		0.0075786
Tb927.11.170	29.49	28.68	25.43	72.73	61.18	65.95		0.338		1.25741		1.95466e-09
Tb927.11.1700	108.07	132.48	95.71	94.7	93.96	114.41		0.371		-0.149926		1.33456e-09
Tb927.11.17000	406.57	454.75	376.14	337.14	369.7	378.84		0.389		-0.188783		9.81653e-13
Tb927.11.17010	116.34	110.06	97.48	106	74.86	89.58		0.332		-0.260151		4.04333e-08
Tb927.11.17020	26.93	28.44	23.66	42.07	41.83	41.32		0.323		0.663993		0.29336
Tb927.11.1710	344.38	368.09	326.34	296.29	274.75	280.26		0.351		-0.287192		5.64966e-14
Tb927.11.1720	53.13	55.12	47.25	69.23	67.09	76.26		0.354		0.451091		0.667933
Tb927.11.1730	29.13	29.23	26.77	45.5	41.83	39.79		0.362		0.578451		0.753285
Tb927.11.1740	64.87	77.73	60.95	92.77	103.42	110.31		0.409		0.590504		0.627708
Tb927.11.1750	68.8	77.6	60.28	67.72	76	81.41		0.347		0.12336		0.00127751
Tb927.11.1760	23.9	22.48	17.27	23.17	26.53	30.04		0.318		0.325143		0.276368
Tb927.11.1770	47.17	45.21	42.59	57.93	52.72	65.8		0.375		0.386621		0.350888
Tb927.11.1780	21.78	22.62	19.93	29.27	28.6	27.44		0.285		0.407223		0.48933
Tb927.11.180	71.61	68.16	62.24	73.61	62.22	71.59		0.395		0.0381283		0.000194356
Tb927.11.1810	39.07	41	35.65	79.02	70.83	87.95		0.331		1.03911		2.30528e-05
Tb927.11.1820	48.53	49.9	40.36	49.25	55.39	58.21		0.348		0.23064		0.0226872
Tb927.11.1840	177.47	196.43	156.28	177.95	182.74	183.97		0.411		0.0388737		3.67612e-06
Tb927.11.18690	11.85	19.57	17.51	7.07	11.26	9.29		0.359		-0.825006		0.000112148
Tb927.11.1890	149.95	150.84	126.12	205.7	196.25	194.36		0.416		0.482131		0.809657
Tb927.11.190	70.45	74.09	66.4	72.39	72.95	75.04		0.382		0.0631606		3.8571e-05
Tb927.11.1900	478.75	508.6	409.51	248.16	236.34	240.03		0.411		-0.94707		4.39455e-47
Tb927.11.1910	27.38	24.65	22.63	56.43	38.32	44.18		0.307		0.895951		0.135337
Tb927.11.1930	20.23	20.29	16.36	52.27	38.17	35.11		0.33		1.14227		0.028229
Tb927.11.1940	19.79	20.97	18.07	42.55	33.38	33.17		0.326		0.891027		0.0455874
Tb927.11.1950	29.29	24.1	27.34	39.19	31.84	28.72		0.332		0.305212		0.398336
Tb927.11.1960	40.86	36.55	31.54	67.7	57.92	60.43		0.349		0.772024		0.0890409
Tb927.11.1970	30.68	31.07	28.79	47.96	39.12	48.68		0.336		0.584431		0.796559
Tb927.11.1980	249.48	268.32	222.36	284.32	315.39	342.92		0.388		0.348854		0.111661
Tb927.11.1990	108.38	123.74	98.16	72.34	71.73	77.28		0.406		-0.57736		6.82944e-24
Tb927.11.200	50.28	51.28	37.24	35.1	35.11	36.85		0.397		-0.374588		2.50357e-05
Tb927.11.2000	27.87	29.41	23.73	32.56	30.41	28.7		0.356		0.17835		0.0249994
Tb927.11.2010	49.01	46.77	41.53	37.14	37.83	42.9		0.356		-0.22024		5.88145e-08
Tb927.11.2020	49.51	54.07	46.36	47.37	44.48	45.51		0.351		-0.126423		2.94185e-06
Tb927.11.2030	43.79	50.62	36.03	70.39	84.58	86.79		0.372		0.890189		0.00286805
Tb927.11.2040	16.03	18.71	15.71	59.9	67.5	63.53		0.372		1.92012		6.67897e-29
Tb927.11.2070	57.08	57.29	49.07	87.94	84.37	76.88		0.357		0.608485		0.590291
Tb927.11.2080	36.69	43.55	36.02	31.52	29.44	34.14		0.312		-0.289838		1.49566e-07
Tb927.11.2090	65.14	72.08	60.23	103.39	103.82	109.79		0.375		0.682995		0.229052
Tb927.11.210	27.47	27.58	23.5	33.55	38.16	41.84		0.301		0.531645		1
Tb927.11.2100	39.06	42.78	36.37	38.54	42.15	41.51		0.322		0.0478922		0.000155935
Tb927.11.2110	52.19	53.37	48.06	81.24	88.66	86.21		0.434		0.737398		0.116139
Tb927.11.2120	62.72	68.91	60.75	49.73	51.83	58.26		0.359		-0.267511		7.45966e-13
Tb927.11.2130	107.14	119.25	97.52	139.93	137.77	151.97		0.374		0.407636		0.377167
Tb927.11.2140	50.1	56.2	44.26	66.28	74.98	85.66		0.365		0.591845		0.626199
Tb927.11.2150	25.62	26.51	21.21	32.92	37.59	38.68		0.352		0.574169		0.769931
Tb927.11.2160	46.7	54.07	45.44	49.93	44.66	48.95		0.398		-0.0265892		0.00186812
Tb927.11.2170	15.62	15.11	12.24	24.61	23.53	21.64		0.301		0.699484		0.34772
Tb927.11.2180	35.1	37.6	30.87	52.6	50.67	58.57		0.349		0.643962		0.407751
Tb927.11.220	12.13	13.06	9.01	25.81	16.33	21.41		0.32		0.893896		0.176553
Tb927.11.2200	38.39	43.49	37.37	55.14	41.59	48.55		0.408		0.284847		0.124266
Tb927.11.2210	14.98	16.3	13.85	19.25	39.23	39.99		0.331		1.1256		0.133207
Tb927.11.2220	30.65	29.31	22.11	34.12	31.95	33.86		0.371		0.284063		0.137669
Tb927.11.2230	27.16	26.27	24.55	86.2	88.57	94.91		0.353		1.79007		4.78919e-32
Tb927.11.2240	70.69	69.25	65.91	78.96	61.76	62.7		0.335		-0.0171319		8.00348e-05
Tb927.11.2260	97	105.87	85.06	75.66	94.44	102.67		0.395		-0.0780331		1.52114e-08
Tb927.11.2270	47.07	53.82	42.97	56.79	62.7	69.58		0.361		0.394255		0.313239
Tb927.11.2280	32.91	36.84	31.3	74.1	77.11	84.51		0.353		1.222		4.77866e-10
Tb927.11.2290	82.27	115.13	88.46	131.15	268.28	329.96		0.399		1.35138		0.0941451
Tb927.11.230	43.68	48.86	42.31	86.6	86.07	89.09		0.349		0.956889		0.000184996
Tb927.11.2300	145.86	154.55	126.55	106.45	101.93	104.56		0.423		-0.448215		3.32848e-20
Tb927.11.2310	17.73	18.1	15.99	23.86	21.42	28.86		0.362		0.516743		0.96322
Tb927.11.2320	26.04	24.75	22.97	61.69	67.37	69.87		0.381		1.43135		6.87796e-16
Tb927.11.2330	31.71	32.57	30.3	50.62	49.42	56.46		0.319		0.726556		0.161476
Tb927.11.2340	33.54	36.38	29.69	37.08	42.27	45.02		0.347		0.320276		0.0841573
Tb927.11.2350	50.72	49.53	42.06	50.52	42.2	52.68		0.395		0.0309902		0.000926603
Tb927.11.2360	85.03	91.14	72.73	105.36	107.67	114.31		0.375		0.395224		0.289538
Tb927.11.2370	94.3	108.2	81.81	115.53	122.32	125.69		0.357		0.354649		0.152497
Tb927.11.2380	26.66	27.33	22.46	36.77	42.08	43.9		0.333		0.683135		0.247532
Tb927.11.240	43.19	45	37.5	33.8	38.43	39.02		0.342		-0.176065		7.40315e-10
Tb927.11.2440	26.34	26.88	23.99	27.5	31.81	37.89		0.341		0.332169		0.154603
Tb927.11.2460	61.5	73.9	57.88	66.51	61.16	69.44		0.356		0.0283086		3.4874e-05
Tb927.11.2490	21.93	25.21	21.05	40.8	58.64	65.67		0.366		1.2758		0.00134547
Tb927.11.250	28.68	29.77	23.53	39.79	37.79	34.42		0.381		0.450155		0.743837
Tb927.11.2500	79.26	78.81	72.58	84.36	72.23	80.96		0.425		0.0425259		2.09674e-05
Tb927.11.2510	46.68	49.62	42.83	33.14	35.98	36.62		0.381		-0.395912		7.29984e-17
Tb927.11.2520	58.19	67.03	57.79	64.04	69.93	72.97		0.396		0.17729		0.00418847
Tb927.11.2530	60.6	67.31	51.76	63.34	68.37	76.88		0.358		0.21532		0.00867524
Tb927.11.2540	108.75	127.14	99.73	142.59	154.39	148.11		0.397		0.407268		0.387526
Tb927.11.2550	32.47	33.95	32.02	51.71	43.99	57.38		0.338		0.636969		0.504567
Tb927.11.2560	27.97	31.64	25.13	25.65	23.87	25.9		0.332		-0.168096		3.2865e-06
Tb927.11.2570	51.79	55.33	46.22	79.91	79.59	83.39		0.355		0.663569		0.270788
Tb927.11.2580	57.54	63.3	52.99	48.85	47.6	49.82		0.307		-0.249043		1.08205e-09
Tb927.11.2590	24.47	27.43	21.89	38.37	46.74	50.01		0.33		0.872744		0.00339001
Tb927.11.260	33.72	34.8	31.84	52.82	60.9	64.76		0.379		0.830578		0.00972363
Tb927.11.2600	48	50.88	40.53	60.63	64.8	66.46		0.327		0.460945		0.663869
Tb927.11.2610	626.83	668.64	565.21	598.98	632.88	639.83		0.438		0.00851155		3.66503e-07
Tb927.11.2620	37.92	38.63	35.61	36.71	36.75	35.18		0.355		-0.0460029		9.82326e-07
Tb927.11.2630	39.16	37.38	33.55	30.61	27	30.27		0.353		-0.325077		7.96714e-12
Tb927.11.2640	42.7	46.85	36.88	36.41	36.34	37.66		0.373		-0.195468		2.50551e-08
Tb927.11.2650	290.45	312.16	263.19	195.7	215.72	230.08		0.411		-0.432585		1.80222e-21
Tb927.11.2660	46.86	50.75	43.04	83.63	84.35	90.23		0.385		0.876435		0.00326226
Tb927.11.2670	63.7	67.96	58.06	56.03	63.87	65.31		0.372		-0.0347098		1.08276e-06
Tb927.11.2680	18.21	24.05	20.56	20.54	25.05	26.97		0.309		0.207951		0.0328871
Tb927.11.2690	141.27	148.12	138.12	43.47	71.82	76.13		0.421		-1.15922		4.2868e-44
Tb927.11.270	36.81	39.32	32.3	25.97	22.15	24.25		0.357		-0.5833		1.13308e-11
Tb927.11.2700	27.82	29.96	23.1	32.91	39.43	41.04		0.349		0.487311		0.848739
Tb927.11.2710	25.83	25.49	21.88	31.9	35.09	38.13		0.368		0.522122		1
Tb927.11.2720	46.08	52.34	45.32	60.32	63.04	63.09		0.351		0.375327		0.301039
Tb927.11.2730	34.42	37.14	32.59	53.72	56.65	61.75		0.383		0.724752		0.126068
[truncated: 3,687 more rows]
