# Supplementary material for: Codon choice directs constitutive mRNA levels in trypanosomes
Source: eLife. 2018 Mar 15;7:e32467. doi: 10.7554/eLife.32467 (PMC5896880; doi:10.7554/eLife.32467)
Supplement: Supplementary file 5. — (B) geCAI values for individual codons derived from mRNA abundances from this and three other studies: A, from reference (Fadda et al., 2014); B, from reference (Christiano et al., 2017); C from reference (Hutchinson et al., 2016). (C) Pairwise Pearson correlation (r) between calculated geCAI values calculated from mRNA abundance measurements in this and three other studies: A, from reference (Fadda et al., 2014); B, from reference (Christiano et al., 2017); C from reference (Hutchinson et al., 2016). [file elife-32467-supp5.xlsx]

## Sheet: SF 5A
		Pairwise Pearson correlation (r) between log2 (mRNA abundance) in different studies
	reference		this study	A	B	C	C
			PCF	PCF	PCF	BSF	PCF
	this study	PCF		0.71	0.78	0.65	0.78
	A	PCF	0.71		0.84	0.68	0.77
	B	PCF	0.78	0.84		0.73	0.86
	C	BSF	0.65	0.68	0.73		0.86
	C	PCF	0.78	0.77	0.86	0.86

## Sheet: SF 5B
Amino Acid	Codon	This study	A	B	C	C
		PCF	PCF	PCF	BSF	PCF
A	GCA	0.554805	0.460626	0.431732	0.359936	0.644808
A	GCC	0.321812	0.391082	0.50095	0.225942	0.286208
A	GCG	0.330048	0.210128	0.226107	0.259111	0.301492
A	GCT	0.212757	0.39463	0.366865	0.173393	0.278378
C	TGC	0.198565	0.316352	0.244515	0.265506	0.479282
C	TGT	0.0242536	0.12457	0.0325078	0.0508914	0.0843642
D	GAC	0.775272	0.42522	0.49135	0.398589	0.418464
D	GAT	0.452828	0.224894	0.468523	0.36394	0.306989
E	GAA	0.320645	0.269539	0.339708	0.275058	0.224122
E	GAG	0.81086	0.471241	0.729857	0.664079	0.633402
F	TTC	0.580393	0.482819	1	0.684326	1
F	TTT	0.151011	0.323901	0.393508	0.371831	0.478402
G	GGA	1	0.367534	1	1	1
G	GGC	0.522799	0.531949	0.292216	0.563839	0.517092
G	GGG	0.581539	0.85638	0.439588	0.6521	0.734904
G	GGT	0.179065	0.133554	0.189776	0.195152	0.187985
H	CAC	0.678742	0.0582756	0.1943	0.121387	0.182403
H	CAT	0.167185	0.0953783	0.112762	0.0821708	0.101874
I	ATA	0.518107	0.0222699	0.205622	0.269995	0.130006
I	ATC	0.822499	1	0.816527	0.337487	0.630936
I	ATT	1	1	1	1	0.938968
K	AAA	0.721155	0.655261	0.763655	0.704198	0.59192
K	AAG	1	1	1	1	1
L	CTA	0.116495	0.155244	0.246647	0.173296	0.307655
L	CTC	0.551231	0.834217	0.836533	0.301897	0.444816
L	CTG	0.154461	0.16297	0.186676	0.181499	0.185835
L	CTT	0.140161	0.302266	0.220672	0.167458	0.184526
L	TTA	0.0871774	0.141931	0.0337575	0.161649	0.129483
L	TTG	0.186501	0.371034	0.300294	0.372002	0.260387
M	ATG	1	1	0.905352	1	1
N	AAC	1	1	0.750426	0.477639	0.499268
N	AAT	0.548805	0.123018	0.329987	0.320905	0.161603
P	CCA	0.606456	0.123771	0.509654	0.308057	0.306225
P	CCC	0.820659	0.539512	1	0.270804	0.328095
P	CCG	0.343576	0.941767	0.155851	0.14209	0.094296
P	CCT	0.262643	0.380179	0.331411	0.174863	0.255541
Q	CAA	0.925169	0.983764	0.331766	0.348908	0.32979
Q	CAG	0.508166	0.161842	0.245568	0.172389	0.169316
R	AGA	0.49791	0.481975	0.25882	0.47979	0.330665
R	AGG	0.0588026	0.0939438	0.0606942	0.193248	0.0983101
R	CGA	0.169695	0.534639	0.0635148	0.111351	0.123054
R	CGC	0.628686	0.281801	0.483431	0.446076	0.593046
R	CGG	0.0836975	0.455242	0.137184	0.146973	0.204506
R	CGT	0.223388	0.389081	0.213244	0.164461	0.165192
S	AGC	0.189153	0.067222	0.091921	0.19186	0.183444
S	AGT	0.0449127	0.0804812	0.026213	0.0506611	0.0326424
S	TCA	0.179923	0.18262	0.103439	0.100054	0.0806652
S	TCC	0.162076	0.402253	0.204122	0.0929248	0.15498
S	TCG	0.14632	0.202929	0.0570997	0.0695548	0.0701878
S	TCT	0.134345	0.0722968	0.112259	0.0957802	0.0836397
T	ACA	0.777495	0.194806	0.361129	0.35916	0.319646
T	ACC	0.930363	0.099703	0.697758	0.217261	0.307365
T	ACG	1	0.200101	0.406571	0.548882	0.366324
T	ACT	0.655525	1	0.465337	0.56865	0.458682
V	GTA	0.117503	0.274085	0.0580771	0.152997	0.15542
V	GTC	0.125765	0.917176	0.233961	0.199254	0.264285
V	GTG	0.251391	0.707562	0.372907	0.427478	0.51605
V	GTT	0.15317	1	0.277882	0.247795	0.455112
W	TGG	0.224098	0.758889	0.558051	0.763994	0.78632
Y	TAC	1	0.676946	1	1	1
Y	TAT	0.244139	0.213971	0.317343	0.3193	0.243318

## Sheet: SF 5C
		Pairwise Pearson correlation (r) between calculated geCAI values calculated fron mRNA abundance measurements in different studies
	reference		this study	A	B	C	C
			PCF	PCF	PCF	BSF	PCF
	this study	PCF		0.42	0.53	0.54	0.59
	A	PCF	0.42		0.8	0.72	0.66
	B	PCF	0.53	0.8		0.8	0.85
	C	BSF	0.54	0.72	0.8		0.93
	C	PCF	0.59	0.66	0.85		0.93
