# Supplementary material for: Codon choice directs constitutive mRNA levels in trypanosomes
Source: eLife. 2018 Mar 15;7:e32467. doi: 10.7554/eLife.32467 (PMC5896880; doi:10.7554/eLife.32467)
Supplement: Supplementary file 6. — (B) Summary of GFP expression levels measured by flow cytometry and calculation of correlation coefficients between expression and geCAI, CAI and tAI. (C) Table showing flow cytometry measurements for cell lines containing GFP transgenes with a 24 bp hairpin in the 5’UTR. (D) Summary of GFP expression levels measured by flow cytometry from cell lines containing a GFP transgene with a hairpin in the 5’UTR. (E) mRNA measurements from Figure 7. (F) Table showing flow cytometry measurements for cell lines containing GFP transgenes with a a range of secondary structures in the 5’UTR. G. mRNA measurements from Figure 8. The rRNA values were used to adjust for loading. [file elife-32467-supp6.xlsx]

## Sheet: SF6 key
	Flow cytometry measurements of GFP fluorescence
	6A	GFP flow cytometry
	6B	GFP flow cytometry summary and calculation of correlation coefficients between expression and geCAI, CAI and tAI scores
	6C	5'UTR hairpin flow cytometry
	6D	5'UTR hairpin flow cytometry summary
	6E	5'UTR hairpin mRNA
	6F	GFP fluorescence with titred secondary structure
	6G	GFP mRNA with titred secondary structure

## Sheet: SF 6A GFP FC
Date	Cell line	GFP	Median	Normalized Median	Average Normalized Median	Average Normalized Median background adjusted	Standard Deviation	Standard Error
2012-12-18	4432.1	eGFP	395.96
	4433.1	GFP_071	103.66	112.401
	4433.2	GFP_071	111.4	120.794	117.277	99.9172	4.35827	2.51625
	4433.3	GFP_071	109.41	118.636
	4434.1	GFP_183	106.5	115.481
	4434.2	GFP_183	105.54	114.44	115.831	98.4714	1.596	0.921451
	4434.3	GFP_183	108.43	117.574
	4435.1	GFP_188	137	148.553
	4435.2	GFP_188	135.77	147.219	146.789	129.429	2.01365	1.16258
	4435.3	GFP_188	133.35	144.595
	4436.1	GFP_194	61.53	66.7186
	4436.2	GFP_194	61.53	66.7186	66.7186	49.3586	0	0
	4436.3	GFP_194	61.53	66.7186
	4437.1	GFP_226	102.74	111.404
	4437.2	GFP_226	101.82	110.406	110.739	93.3787	0.575953	0.332527
	4437.3	GFP_226	101.82	110.406
	4439.1	GFP_102	42.55	46.1381
	4439.2	GFP_102	43.32	46.973	46.8357	29.4757	0.640059	0.369538
	4439.3	GFP_102	43.71	47.3959
2012-12-20	4432.1	eGFP	429.35	429.35
	4432.2	eGFP	429.35	429.35	429.35	411.99	6.96187e-14	0		All values for GFP fluorescence were normalized to the measurements of cell line 4432.1 on 20/12/2012
	4432.3	eGFP	429.35	429.35
	4444.1	GFP_S1	42.17	42.17
	4444.2	GFP_S1	42.55	42.55	42.17	24.81	0.38	0.219393
	4444.3	GFP_S1	41.79	41.79
	4446.1	GFP_S3	39.24	39.24
	4446.2	GFP_S3	37.18	37.18	37.7567	20.3967	1.29516	0.74776
	4446.3	GFP_S3	36.85	36.85
2013-01-23	4432.1	eGFP	406.79
	4445.1	GFP_S2	35.87	37.8593
	4445.2	GFP_S2	35.55	37.5216	37.8593	20.4993	0.337747	0.194998
	4445.3	GFP_S2	36.19	38.197
2013-01-25	4432.1	eGFP	425.51		449.1
	4447.1	GFP_S4	67.31	64.3499
	4447.2	GFP_S4	64.36	64.9408	64.5488	47.1888	0.339531	0.196028
	4447.3	GFP_S4	63.78	64.3556
	4448.1	GFP_S5	28.9	29.1608
	4448.2	GFP_S5	28.39	28.6462	28.9893	11.6293	0.297106	0.171534
	4448.3	GFP_S5	28.9	29.1608
2013-02-08	4432.1	eGFP	482.61
	parental		19.46	17.3124
	parental		19.63	17.4637	17.3628		0.0873179	0.050413		This is the normalized value for background
	parental		19.46	17.3124
2013-04-26	4432.1	eGFP	425.51
	4505.1	GFP_P1	62.08	62.6402
	4505.2	GFP_P1	62.64	63.2053	63.0169	45.6569	0.326234	0.188351
	4505.3	GFP_P1	62.64	63.2053
2013-08-24	4432.1	eGFP	562.34
	4533.1	GFP_163	205.35	156.786
	4533.2	GFP_163	207.21	158.206	157.259	139.899	0.819907	0.473374
	4533.3	GFP_163	205.35	156.786
	beads		2824
2013-08-29	4432.1	eGFP	500.29		491.37
	4534.1	GFP_205	187.69	161.076
	4534.2	GFP_205	191.1	164.002	158.75	141.39	6.72348	3.8818
	4534.4	GFP_205	173.01	151.173
	beads		2841
2013-09-06	4432.1	eGFP	523.3		491.37
	4535.1	GFP_211	189.38	155.38
	4535.4	GFP_211	168.49	147.223	150.831	133.471	4.15876	2.40106
	4535.3	GFP_211	182.69	149.891
	4536.1	GFP_224	186.01	152.615
	4536.4	GFP_224	171.54	149.888	151.706	134.346	1.57412	0.908819
	4536.3	GFP_224	186.01	152.615
	beads		2985
2013-09-19	4432.1	eGFP	571.98
	4531.1	GFP_P2	232.91	174.831
	4531.2	GFP_P2	235.01	176.407	175.357	157.997	0.9101	0.525447
	4531.4	GFP_P2	232.91	174.831
	4532.1	GFP_P3	598.89	449.55
	4532.2	GFP_P3	572.55	429.778	442.959	425.599	11.4153	6.5906
	4532.4	GFP_P3	598.89	449.55
2014-07-18	4432	eGFP	604.3
	4725.1	GFP_065	273.84	194.561
	4725.2	GFP_065	273.84	194.561	193.981	176.621	1.005	0.580235
	4725.3	GFP_065	271.39	192.82
2014-09-05	4432	eGFP	557.31
	4726.1	GFP_075	474	365.168
	4726.2	GFP_075	486.97	375.16	371.83	354.47	5.76891	3.33068
	4726.3	GFP_075	486.97	375.16
	4727.1	GFP_095	296.93	228.754
	4727.2	GFP_095	305.05	235.01	232.223	214.863	3.18326	1.83786
	4727.3	GFP_095	302.32	232.906

## Sheet: SF 6B GFP FC summary
								calculations
GFP	geCAI	CAI	tAI	Median Fluorescence +/- SE	Expression normalised to eGFP	log10 (100 x normalised expression)		geCAI	log10 (100 x normalised expression)					CAI	log10 (100 x normalised expression)						tAI	log10 (100 x normalised expression)
eGFP	0.5466	0.8328	62.41	411.99 ± 0.00	1	2		0.5466	2					0.8328	2						62.41	2
GFP P3	0.5201	0.8487	70.18	425.60 ± 6.59	1.03303	2.01411		0.5201	2.01411					0.8487	2.01411						70.18	2.01411
GFP 075	0.52	0.8304	51.66	354.47 ± 3.33	0.860384	1.93469		0.52	1.93469					0.8304	1.93469						51.66	1.93469
GFP 095	0.543	0.8378	58.04	214.86 ± 1.84	0.521526	1.71728		0.543	1.71728					0.8378	1.71728						58.04	1.71728
GFP 065	0.5181	0.8304	51.06	176.62 ± 0.58	0.4287	1.63215		0.5181	1.63215					0.8304	1.63215						51.06	1.63215
GFP P2	0.4933	0.8162	43.88	158.00 ± 0.51	0.383504	1.58377		0.4933	1.58377					0.8162	1.58377						43.88	1.58377
GFP 163	0.4919	0.8079	55.4	139.90 ± 0.47	0.339571	1.53093		0.4919	1.53093					0.8079	1.53093						55.4	1.53093
GFP 224	0.4676	0.803	51.55	134.35 ± 0.91	0.3261	1.51335		0.4676	1.51335					0.803	1.51335						51.55	1.51335
GFP211	0.501	0.8204	55.15	133.47 ± 2.40	0.323964	1.5105		0.501	1.5105					0.8204	1.5105						55.15	1.5105
GFP 205	0.4676	0.803	51.55	140.49 ± 3.88	0.341003	1.53276		0.4676	1.53276					0.803	1.53276						51.55	1.53276
GFP188	0.435	0.7945	52.59	129.43 ± 1.16	0.314158	1.49715		0.435	1.49715					0.7945	1.49715						52.59	1.49715
GFP 183	0.4276	0.7937	48.54	98.47 ± 0.92	0.239011	1.37842		0.4276	1.37842					0.7937	1.37842						48.54	1.37842
GFP 71	0.4408	0.8355	52.39	99.92 ± 2.52	0.24253	1.38477		0.4408	1.38477					0.8355	1.38477						52.39	1.38477
GFP226	0.4316	0.803	54.76	93.38 + 0.33	0.226656	1.35537		0.4316	1.35537					0.803	1.35537						54.76	1.35537
GFP S4	0.379	0.7357	33.47	47.19 ± 0.20	0.114542	1.05896		0.379	1.05896					0.7357	1.05896						33.47	1.05896
GFP 194	0.4358	0.8223	52.24	49.36 ± 0.00	0.119809	1.07849		0.4358	1.07849					0.8223	1.07849						52.24	1.07849
GFP P1	0.4116	0.9989	63.1	45.66 ± 0.19	0.110828	1.04465		0.4116	1.04465					0.9989	1.04465						63.1	1.04465
GFP 102	0.3751	0.7809	39.66	29.48 ± 0.37	0.0715551	0.854641		0.3751	0.854641					0.7809	0.854641						39.66	0.854641
GFP S1	0.3755	0.6705	24.98	24.81 ± 0.22	0.0602199	0.77974		0.3755	0.77974					0.6705	0.77974						24.98	0.77974
GFP S3	0.375	0.6982	29.93	20.40 ± 0.75	0.0495158	0.694743		0.375	0.694743					0.6982	0.694743						29.93	0.694743
GFP S2	0.374	0.7135	31.36	20.50 ± 0.19	0.0497585	0.696867		0.374	0.696867					0.7135	0.696867						31.36	0.696867
GFP S5	0.3862	0.7555	35.72	11.63 ± 0.17	0.0282288	0.450693		0.3862	0.450693					0.7555	0.450693						35.72	0.450693
								r =	0.918323					r =	0.499058						r =	0.77792
								r2 =	0.843316					r2 =	0.249059						r2 =	0.60516

## Sheet: SF 6C 5'UTR hairpin FC
Date	Cell line	GFP	hairpin in 5'UTR?	Mean	Median	Median Normalized	Median Normalized Average	Average Normalized Median background adjusted	Standard Error
2014-09-27	4432.1	eGFP	no	613	598.89
	parental			25.89	25.48
	4724.1	eGFP	yes	25.49	25.03	17.9442
	4724.2	eGFP	yes	25.17	24.8	17.7794	17.8343	0.474322	0.0549631
	4724.3	eGFP	yes	25.33	24.8	17.7794
2014-11-26	4432.1	eGFP	no	609.99	598.89
	parental			22.07	21.48
	4769.1	GFP_102	yes	20.81	20.17	14.4601
	4769.2	GFP_102	yes	23.78	23.5	16.8474	15.8055	-1.55453	0.705666
	4769.3	GFP_102	yes	22.67	22.47	16.109
	4770.1	GFP_226	yes	23.8	23.5	16.8474
	4770.2	GFP_226	yes	23.03	22.67	16.2523	16.2117	-1.14828	0.37927
	4770.3	GFP_226	yes	22.18	21.67	15.5354
	4771.1	GFP P2	yes	24.07	23.71	16.9979
	4771.2	GFP P2	yes	23.62	23.29	16.6968	16.649	-0.710969	0.216555
	4771.3	GFP P2	yes	23.12	22.67	16.2523
	4772.1	GFP_065	yes	24.19	23.93	17.1556
	4772.2	GFP_065	yes	23.71	23.5	16.8474	17.0529	-0.30711	0.102757
	4772.3	GFP_065	yes	24.22	23.93	17.1556

## Sheet: SF 6D Hairpin FC summary
GFP	Average Normailised Median background adjusted	Standard Error
eGFP + hairpin	0.474322	0.0549631
GFP_102 + hairpin	-1.55453	0.705666
GFP_226 + hairpin	-1.14828	0.37927
GFP_P2 + hairpin	-0.710969	0.216555
GFP_065 + hairpin	-0.30711	0.102757
All values were normalized based on the measurements of 4432
Value of 4432 of the day 20/12/2012 was used as reference (see sheet 1)

## Sheet: SF 6E hairpin mRNA
	cell lines	transgene	geCAI	average mRNA abundance*	standard error	ratio hairpin / control
	p4432	eGFP	0.547	0.279565	0.0390135	1.40218
	p4724	eGFP + hairpin		0.391999	0.0101038
	p4725	GFP 065	0.518	0.0346012	0.00117727	3.16151
	p4771	GFP 065 + hairpin		0.109392	0.010798
	p4532	GFP P2	0.493	0.189074	0.0248066	2.5893
	p4772	GFP P2 + hairpin		0.48957	0.0370867
	p4437	GFP 226	0.432	0.0882493	0.00488999	5.2257
	p4770	GFP 226 + hairpin		0.461165	0.0272725
	p4439	GFP 102	0.375	0.0459191	0.00402704	14.345
	p4769	GFP 102 + hairpin		0.658708	0.108032
	* The mRNA abundance is only comparable between pairs of trangenes, + / - hairpin, as cognate GFP probes were used for each transgene. Three independent clones for each cell line were measured.

## Sheet: SF 6F Titred Hairpin FC
Cell line	GFP	structure in 5'UTR?	Mean	Median	Median Background adjusted	Average Median background adjusted	Standard Error	relative expression
parental	n/a	n/a	19.53	20.35
4699.1	eGFP	no	516	478.29	457.94
4699.2	eGFP	no	471.28	453.16	432.81	438.493	9.99919	1
4699.3	eGFP	no	463.83	445.08	424.73
4841.1	eGFP	18 bp	19.67	19.11	-1.24
4841.2	eGFP	18 bp	20.58	19.81	-0.54	-0.95	0.210792	0
4841.3	eGFP	18 bp	19.85	19.28	-1.07
4842.1	eGFP	12 bp	74.09	69.16	48.81
4842.2	eGFP	12 bp	67.85	64.94	44.59	47.1967	1.31556	0.107634
4842.3	eGFP	12 bp	73.99	68.54	48.19

## Sheet: SF 6G Titred hairpin mRNA
Phosphorimager data and analysis from Figure 6
								wt	18 bp	12 bp
GFP	rRNA	GFP/rRNA	average	SE	relative	SE relative
6903	1266	5.45261						5.45261	5.00548	3.54884
5742	1376	4.17297	4.41096	0.445661	1	0.101057		4.17297	3.97663	3.23375
3849	1067	3.60731						3.60731	5.13226	3.2585
5481	1095	5.00548							p = 0.68	p = 0.13
4764	1198	3.97663	4.70479	0.298768	1.06685	0.067748
6364	1240	5.13226							The risk to reject the null hypothesis of no difference to wt while it is true
4287	1208	3.54884
4178	1292	3.23375	3.34703	0.0825961	0.758963	0.0187293
3643	1118	3.2585
