# Supplementary material for: Codon choice directs constitutive mRNA levels in trypanosomes
Source: eLife. 2018 Mar 15;7:e32467. doi: 10.7554/eLife.32467 (PMC5896880; doi:10.7554/eLife.32467)
Supplement: Supplementary file 7. [file elife-32467-supp7.xlsx]

## Sheet: Sheet1
	GFP	geCAI		TPM			TPM	TPM	TPM SE
				biological replicate 1	biological replicate 2	biological replicate 3	average	corrected gene dose	corrected gene dose
	GFP_102	0.378195		16.75	16.11	16.95	16.6033	132.827	2.02667
	GFP_226	0.471462		67.34	55.18	68.45	63.6567	509.253	34.0034
	GFP_eGFP	0.55101		235.14	198.33	261.33	231.6	1852.8	146.18
	GFP_S5	0.389426		3.92	11.93	6.4	7.41667	59.3333	18.94
				log10 TPM
		geCAI		mean	plus SE	minus SE
	GFP_102	0.378195		2.12329	2.12986	2.11661
	GFP_226	0.471462		2.70693	2.73501	2.67692
	eGFP	0.55101		3.26783	3.30081	3.23214
	GFP_S5	0.389426		1.7733	1.89361	1.60631
		R=		0.960911
		R2=		0.923349
