# Supplementary material for: Codon choice directs constitutive mRNA levels in trypanosomes
Source: eLife. 2018 Mar 15;7:e32467. doi: 10.7554/eLife.32467 (PMC5896880; doi:10.7554/eLife.32467)
Supplement: Supplementary file 8. — The cytosolic ribosome proteins encoded by > 1 gene were similar and the geCAI values is for the first gene in the list. [file elife-32467-supp8.xlsx]

## Sheet: ribo prots
Cytoplasmic							Mitochondrial
PDB 4V8M chain ID	TriTrypDB annotation	geCAI	gene numbers				Annotation	geCAI	gene numbers
4V8M:Bf	RPL3	0.416514	Tb927.4.1790	Tb927.4.1800			MRPL2	0.36122	Tb927.5.3360				mean geCAI	Stdev
4V8M:Br	RPL4	0.40259	Tb927.3.5050				MRPL3	0.406052	Tb927.3.5610			mitochondrial	0.376441	0.0317676
4V8M:Bu	RPL5	0.469466	Tb927.9.15110	Tb927.9.15170			MRPL4	0.411651	Tb927.11.6000			cytoplasmic	0.437494	0.0335612
4V8M:Bv	RPL6	0.468083	Tb927.10.11390				MRPL7/12	0.347207	Tb927.7.4550
4V8M:Bw	RPL7	0.441943	Tb927.7.1730	Tb927.7.1740	Tb927.7.1750		MRPL9	0.384938	Tb927.5.3410				p < 0.00001
4V8M:Bx	RPL7A	0.410527	Tb927.8.1330	Tb927.8.1340			MRPL11	0.356928	Tb927.2.4740	Tb927.2.4890
4V8M:Be	RPL8	0.420007	Tb927.11.16280	Tb927.5.1110			MRPL13	0.391552	Tb927.4.1070				The risk to reject the null hypothesis of no difference
4V8M:By	RPL9	0.453574	Tb927.10.1100	Tb927.6.4690			MRPL14	0.319655	Tb927.4.930
4V8M:BK	RPL10	0.412502	Tb927.9.8070	Tb927.9.8420			MRPL15	0.386335	Tb927.5.3980
4V8M:BJ	RPL10A	0.421799	Tb927.11.9710	Tb927.10.13500			MRPL16	0.421274	Tb927.7.3960
4V8M:BL	RPL11	0.443027	Tb927.9.7590	Tb927.9.7620			MRPL17	0.427123	Tb927.8.5860
4V8M:BM	RPL12	0.409547	Tb927.8.6030	Tb927.9.14000			MRPL20	0.325287	Tb927.11.10170
4V8M:BN	RPL13	0.458016	Tb927.3.3310	Tb927.3.3320			MRPL21	0.352845	Tb927.7.4140
4V8M:BO	RPL13A	0.378328	Tb927.4.3550	Tb927.5.1610			MRPL22	0.357315	Tb927.7.2760
4V8M:BP	RPL14	0.410872	Tb927.11.11230	Tb927.6.720			MRPL23	0.356997	Tb927.11.870
4V8M:BQ	RPL15	0.412192	Tb927.9.15190	Tb927.6.5040			MRPL24	0.3785	Tb927.3.1710
4V8M:BR	RPL17	0.498832	Tb927.11.4820	Tb927.10.14580			MRPL27	0.338518	Tb927.11.3640
4V8M:BS	RPL18(a)	0.391189	Tb927.11.14130	Tb927.10.3840			MRPL28	0.366245	Tb927.6.4040
4V8M:BI	RPL18(b)		Tb927.10.9880	Tb927.11.4330			MRPL29	0.381551	Tb927.10.600
4V8M:BT	RPL19	0.45803	Tb927.7.5000	Tb927.7.5020			MRPL30	0.376907	Tb927.9.8290
4V8M:BU	RPL21	0.411514	Tb927.11.680	Tb927.4.1100	Tb11.0880		MRPL33	0.481503	Tb927.4.1810
4V8M:BV	RPL22	0.507408	Tb927.11.10160	Tb927.10.9800			MRPL38	0.373845	Tb927.11.14980
4V8M:BW	RPL23	0.401099	Tb927.9.11380	Tb927.9.11410			MRPL43	0.387955	Tb927.4.4600
4V8M:BY	RPL24	0.446031	Tb927.10.5480	Tb927.10.5460			MRPL46	0.358496	Tb927.7.4710
4V8M:BX	RPL23A	0.466304	Tb927.7.5170	Tb927.7.5180			MRPL47	0.389231	Tb927.9.7170
4V8M:BZ	RPL26	0.452812	Tb927.8.6180	Tb927.9.14370			MRPL49	0.375963	Tb927.5.3110
4V8M:Ba	RPL27	0.440014	Tb927.11.15880	Tb927.11.15900			MRPL52	0.314806	Tb927.11.4650
4V8M:Bc	RPL28	0.443027	Tb927.11.6180	Tb927.11.6200
4V8M:Bb	RPL27A	0.453917	Tb927.9.11470	Tb927.9.11490			MRPS5	0.385142	Tb927.10.6300
4V8M:Bd	RPL29	0.453622	Tb927.11.10030	Tb927.11.10025			MRPS6	0.373171	Tb927.10.2800
4V8M:Bg	RPL30	0.455682	Tb927.10.4110	Tb927.10.4120			MRPS8		Tb927.10.13300
4V8M:Bh	RPL31	0.456025	Tb927.9.12200	Tb927.9.12240			MRPS9	0.367949	Tb927.8.3110
4V8M:Bi	RPL32	0.431068	Tb927.9.15420	Tb927.10.270			MRPS11	0.395482	Tb927.10.10400
4V8M:Bj	RPL34	0.428795	Tb927.11.9730	Tb927.10.12680			MRPS15	0.408903	Tb927.1.1200
4V8M:Bk	RPL35	0.440017	Tb927.9.1810	Tb927.9.1850			MRPS16	0.364866	Tb927.11.7790
4V8M:Bl	RPL35A	0.4543	Tb927.4.2180				MRPS17		Tb927.9.11300
4V8M:Bm	RPL36	0.483916	Tb927.10.1590	Tb927.9.15210			MRPS18	0.426449	Tb927.10.6850
4V8M:Bn	RPL37	0.433586	Tb927.11.3000	Tb927.9.9210			MRPS29	0.366926	Tb927.6.1250
4V8M:Bo	RPL37A	0.401751	Tb927.10.220	Tb927.10.6370			MRPS34	0.38204	Tb927.8.5280
4V8M:Bp	RPL38	0.44776	Tb927.10.3280	Tb927.9.2020
4V8M:Bq	RPL39	0.526748	Tb927.8.5260
4V8M:Bs	Ub-RPL40		Tb927.11.13003	Tb927.11.13007			Average	0.377801
4V8M:Bt	RPL44	0.496637	Tb927.11.3230	Tb927.2.6090
							SD	0.0325148
4V8M:AC	RPSA	0.423411	Tb927.11.10790	Tb927.11.10910
4V8M:A0	RPS3A	0.453796	Tb927.10.3930	Tb927.10.3940	Tb11.v5.0501
4V8M:AP	RPS2	0.414716	Tb927.10.14600	Tb927.10.14710
4V8M:AX	RPS3	0.442383	Tb927.9.6070	Tb927.10.11540
4V8M:A1	RPS4	0.43438	Tb927.11.3590	Tb927.11.3600
4V8M:A2	RPS5	0.426573	Tb927.11.6300
4V8M:A3	RPS6	0.406542	Tb927.9.15360	Tb927.10.190
4V8M:A4	RPS7	0.402043	Tb927.9.3990	Tb927.9.3920
4V8M:A5	RPS8	0.416811	Tb927.8.6150	Tb927.8.6160
4V8M:A6	RPS9	0.435045	Tb927.8.1110	Tb927.10.5500
4V8M:AD	RPS10		Tb927.10.5360	Tb927.10.5370
4V8M:AE	RPS11	0.481549	Tb927.1.3180	Tb927.10.560
4V8M:AF	RPS12	0.393028	Tb927.11.4290	Tb927.10.8430
4V8M:AG	RPS13	0.417857	Tb927.2.5910	Tb927.10.15120
4V8M:A8	RPS14	0.42802	Tb11.0290	Tb11.0390
4V8M:AH	RPS29	0.42802	Tb927.11.11475	Tb927.11.11725
4V8M:AI	RPS15	0.444463	Tb927.7.2340	Tb927.7.2370
4V8M:AK	RPS16	0.445463	Tb927.7.1040	Tb927.7.1050
4V8M:AL	RPS17	0.468616	Tb927.11.11820	Tb927.11.11830
4V8M:AM	RPS18	0.392651	Tb927.10.5330	Tb927.10.5340
4V8M:AO	RPS19	0.435539	Tb927.4.1860
4V8M:AQ	RPS20		Tb927.11.7675	Tb927.11.7685
4V8M:AR	RPS21	0.443733	Tb927.11.6500	Tb927.11.6510
4V8M:AJ	RPS15A	0.425158	Tb927.11.6140	Tb927.3.4360
4V8M:AS	RPS23	0.424104	Tb927.10.1080	Tb927.10.1090
4V8M:AT	RPS24	0.504025	Tb927.10.7330	Tb927.10.7340
4V8M:AU	RPS25	0.490834	Tb927.3.1370	Tb927.10.2840
4V8M:AV	RPS26	0.401456	Tb927.11.8200
4V8M:AW	RPS27	0.447694	Tb927.11.9720	Tb927.10.13517
4V8M:AZ	RPS33	0.405063	Tb927.7.230	Tb927.7.240
4V8M:AY	RPS30	0.513591	Tb927.6.2100	Tb927.6.2110
4V8M:A9	Ub-RPS27A	0.414542	Tb927.7.3680
	average	0.439017
	SD	0.0317379
