# Supplementary material for: Codon choice directs constitutive mRNA levels in trypanosomes
Source: eLife. 2018 Mar 15;7:e32467. doi: 10.7554/eLife.32467 (PMC5896880; doi:10.7554/eLife.32467)
Supplement: Supplementary file 9. — The rRNA data was used to adjust for loading. [file elife-32467-supp9.xlsx]

## Sheet: Sheet1
GFP						rRNA
	Band No	Volume	Vol + BkGnd	Area			Band No	Volume	Vol + BkGnd	Area		GFP/rRNA	RELATIVE
clone 1
0	1	1.74026e+06	1.95329e+06	3840		Lane 1	1	467028	531940	4352		3.72625	1
15	1	1.80723e+06	2.02026e+06	3840		Lane 2	1	514400	579313	4352		3.51328	0.942845
30	1	1.83056e+06	2.04359e+06	3840		Lane 3	1	507853	572766	4352		3.60451	0.967329
60	1	1.96831e+06	2.18134e+06	3840		Lane 4	1	507468	572380	4352		3.87869	1.04091
clone 2																AVERAGE	ST DEV	ST ERROR			EGFP	GFP P3	GFP P2	GFP 226	GFP 102
0	1	3.01621e+06	3.22924e+06	3840		Lane 6	1	558265	623178	4352		5.40282	1		0	1	0	0		0	1	1	1	1	1
15	1	2.47765e+06	2.69068e+06	3840		Lane 7	1	502749	567661	4352		4.92821	0.912155		15	0.973656	0.0814035	0.0469983		15	0.973656	0.962547	0.726452	0.686277	0.252984
30	1	2.26047e+06	2.4735e+06	3840		Lane 8	1	460565	525477	4352		4.90804	0.908422		30	0.99862	0.109259	0.0630804		30	0.99862	1.01902	0.690374	0.616135	0.0396059
60	1	2.4963e+06	2.70933e+06	3840		Lane 9	1	487254	552167	4352		5.1232	0.948246		60	1.01238	0.0556526	0.0321311		60	1.01238	1.01617	0.601936	0.101288
clone 3
0	1	1.74493e+06	1.95796e+06	3840		Lane 11	1	460695	525608	4352		3.78759	1
15	1	1.79985e+06	2.01288e+06	3840		Lane 12	1	445789	510702	4352		4.03745	1.06597
30	1	2.06637e+06	2.2794e+06	3840		Lane 13	1	487062	551975	4352		4.24252	1.12011
60	1	1.8857e+06	2.09873e+06	3840		Lane 14	1	475068	539981	4352		3.96931	1.04798
GFP P3						rRNA
	Band No	Volume	Vol+BkGnd	Area			Band No	Volume	Vol+BkGnd	Area		EGFP/RRNA	RELATIVE
clone 1
0	1	1.07462e+06	1.47765e+06	3658		Lane 1	1	450355	494274	4216		2.38617	1
15	1	968822	1.37185e+06	3658		Lane 2	1	509817	553736	4216		1.90033	0.796396
30	1	1.15971e+06	1.56274e+06	3658		Lane 3	1	521450	565369	4216		2.22401	0.932044
60	1	1.05776e+06	1.46079e+06	3658		Lane 4	1	488887	532807	4216		2.1636	0.906727
clone 2																AVERAGE	ST DEV	ST ERROR
0	1	819710	1.22274e+06	3658		Lane 6	1	398136	442055	4216		2.05887	1		0	1	0	0
15	1	992852	1.39588e+06	3658		Lane 7	1	435176	479096	4216		2.28149	1.10813		15	0.962547	0.156881	0.090575
30	1	1.03469e+06	1.43772e+06	3658		Lane 8	1	477217	521136	4216		2.16818	1.05309		30	1.01902	0.0759101	0.0438267
60	1	1.05452e+06	1.45755e+06	3658		Lane 9	1	473966	517886	4216		2.22488	1.08063		60	1.01617	0.0952765	0.0550079
clone 3
0	1	1.05177e+06	1.45463e+06	3658		Lane 11	1	401481	445400	4216		2.61972	1
15	1	1.08076e+06	1.48379e+06	3658		Lane 12	1	419633	463552	4216		2.5755	0.983118
30	1	1.23552e+06	1.63855e+06	3658		Lane 13	1	439976	483895	4216		2.80815	1.07193
60	1	1.33798e+06	1.74101e+06	3658		Lane 14	1	481305	525225	4216		2.7799	1.06114
GFP P2						rRNA
	Band No	Volume	Vol+BkGnd	Area			Band No	Volume	Vol+BkGnd	Area		EGFP/RRNA	RELATIVE
clone 1
0	1	712008	935460	4352		Lane 1	1	270875	306353	4352		2.62855	1
15	1	702525	925977	4352		Lane 2	1	329431	364908	4352		2.13254	0.811301
30	1	517191	740643	4352		Lane 3	1	304851	340329	4352		1.69654	0.645427
60	1	468565	692017	4352		Lane 4	1	299110	334587	4352		1.56653	0.595969
clone 2
0	1	888475	1.11193e+06	4352		Lane 6	1	319708	355185	4352		2.77902	1			1	0	0
15	1	498010	721462	4352		Lane 7	1	293846	329324	4352		1.6948	0.609854			0.726452	0.104409	0.0602806
30	1	447353	670098	4352		Lane 8	1	296485	331962	4352		1.50886	0.542947			0.690374	0.174302	0.100634
60	1	396099	618360	4352		Lane 9	1	297586	333064	4352		1.33104	0.478961			0.601936	0.126065	0.0727835
clone 3
0	1	724625	948066	4352		Lane 11	1	320057	355534	4352		2.26405	1
15	1	520653	744105	4352		Lane 12	1	303303	338781	4352		1.71661	0.758203
30	1	674103	897555	4352		Lane 13	1	337290	372767	4352		1.99859	0.882747
60	1	539073	762508	4352		Lane 14	1	325774	360730	4352		1.65475	0.730878
GFP 226						rRNA
	Band No	Volume	Vol+BkGnd	Area			Band No	Volume	Vol+BkGnd	Area		EGFP/RRNA	RELATIVE
clone 1
0	1	984532	1.23755e+06	4544		Lane 1	1	282280	334651	4352		3.48779	1
15	1	704885	957907	4544		Lane 2	1	355628	407999	4352		1.98208	0.568293
30	1	505502	758523	4544		Lane 3	1	356112	408483	4352		1.4195	0.406992
60	1	78673.2	327461	4544		Lane 4	1	347806	400176	4352		0.226199	0.0648545
clone 2
0	1	659583	912384	4544		Lane 6	1	282783	335154	4352		2.33247	1			1	0	0
15	1	492610	745631	4544		Lane 7	1	300033	352403	4352		1.64185	0.703913			0.686277	0.110229	0.0636408
30	1	459930	712952	4544		Lane 8	1	294001	346372	4352		1.56438	0.670698			0.616135	0.1879	0.108484
60	1	77089.1	325463	4544		Lane 9	1	307960	360331	4352		0.250321	0.10732			0.101288	0.0338233	0.0195279
clone 3
0	1	685890	938843	4544		Lane 11	1	304032	355633	4352		2.25598	1
15	1	560854	813875	4544		Lane 12	1	316044	367645	4352		1.77461	0.786625
30	1	591561	844582	4544		Lane 13	1	340229	392600	4352		1.73871	0.770714
60	1	100494	351652	4544		Lane 14	1	338265	389866	4352		0.297088	0.131689
GFP 102						rRNA
	Band No	Volume	Vol+BkGnd	Area			Band No	Volume	Vol+BkGnd	Area		EGFP/RRNA	RELATIVE
clone 1
0	1	108116	262791	5056		Lane 1	1	173853	189965	4352		0.621883	1
15	1	39998.8	194494	5056		Lane 2	1	215486	231598	4352		0.185621	0.298482
30	1	8766.49	159609	5056		Lane 3	1	213263	229375	4352		0.0411066	0.0661001
60						Lane 4	1	201492	217605	4352		0	0
clone 2
0	1	196470	350915	5056		Lane 6	1	222376	238488	4352		0.883507	1			1	0	0
15	1	37266.6	188475	5056		Lane 7	1	173175	189288	4352		0.215196	0.24357			0.252984	0.0415976	0.0240164
30	1	10877.4	156098	5056		Lane 8	1	233538	249650	4352		0.0465764	0.0527176			0.0396059	0.0349463	0.0201762
60						Lane 11	1	220248	236360	4352		0	0			0	0	0
clone 3
0	1	197081	351745	5056		Lane 16	1	235951	252063	4352		0.835265	1
15	1	43881.6	193337	5056		Lane 17	1	242213	258325	4352		0.181169	0.216901
30	1	0	115674	5056		Lane 18	1	272584	288696	4352		0	0
60						Lane 19	1	205203	221316	4352		0	0
