# Supplementary material for: Codon choice directs constitutive mRNA levels in trypanosomes
Source: eLife. 2018 Mar 15;7:e32467. doi: 10.7554/eLife.32467 (PMC5896880; doi:10.7554/eLife.32467)
Supplement: Supplementary file 10. — Of the 5136 single copy genes used in this study both the footprinting dataset contained measures for > 5000. Study A is from reference (Vasquez et al., 2014) and study B is from reference (Jensen et al., 2014). [file elife-32467-supp10.xlsx]

## Sheet: SF 10 Correlations
		Ribosome footprint measures					Correlation between geCAI and log 10 footprint measure for Study A				Correlation between geCAI and log 10 footprint measure for Study B
			Study A		Study B							Study B
Gene number	geCAI		PF footprint level		PF Ribosome FPKM		geCAI	PCF footprint level	log10 PCF footprint level	Pearson's correlation coefficient geCAI and log(footprint) R = 0.375; R2 = 0.141	geCAI	PF Ribosome FPKM	log10 PCF Ribosome FPKM	Pearson's correlation coefficient geCAI and log(footprint) R = 0.494; R2 = 0.244
Tb927.10.15790	0.371		992		103		0.419	96554	4.98477		0.419	3810	3.58092
Tb927.6.4590	0.385		4963		129		0.419	87447	4.94174		0.415	2679	3.42797
Tb927.11.13010	0.402		686		97		0.405	72501	4.86034		0.399	2533	3.40364
Tb927.10.9440	0.374		2133		52		0.425	46976	4.67188		0.482	2038	3.3092
Tb927.7.2210	0.295		2696		254		0.419	41280	4.61574		0.419	1885	3.27531
Tb927.7.6270	0.369		3101		51		0.389	41109	4.61394		0.419	1773	3.24871
Tb927.10.11390	0.47		36336		694		0.433	38000	4.57978		0.425	1737	3.2398
Tb927.10.15380	0.408		897		43		0.396	36577	4.56321		0.384	1646	3.21643
Tb927.11.16300	0.351		2264		16		0.47	36336	4.56034		0.395	1563	3.19396
Tb927.7.4220	0.362		5007		27		0.415	35541	4.55073		0.419	1329	3.12352
Tb927.7.5480	0.368		2525		42		0.437	30894	4.48987		0.411	1202	3.0799
Tb927.8.3750	0.396		9067		217		0.386	30425	4.48323		0.429	1039	3.01662
Tb927.3.2090	0.367		5309		72		0.331	28662	4.45731		0.495	999	2.99957
Tb927.11.11620	0.412		1395		66		0.411	27000	4.43136		0.438	985	2.99344
Tb927.11.16760	0.394		22797		437		0.415	24199	4.3838		0.437	949	2.97727
Tb927.11.3240	0.396		21499		353		0.426	23106	4.36372		0.412	926	2.96661
Tb927.7.3800	0.342		722		25		0.394	22797	4.35788		0.375	917	2.96237
Tb927.4.1860	0.437		30894		949		0.396	21499	4.33242		0.447	903	2.95569
Tb927.10.10770	0.357		77		1		0.438	21406	4.33054		0.421	877	2.943
Tb927.3.5270	0.354		434		51		0.385	20604	4.31395		0.334	872	2.94052
Tb927.6.2790	0.386		30425		638		0.411	19713	4.29475		0.415	872	2.94052
Tb927.8.5040	0.361		1221		16		0.396	19586	4.29195		0.387	871	2.94002
Tb927.10.11030	0.387		3503		213		0.456	19291	4.28535		0.453	821	2.91434
Tb927.3.4990	0.363		1323		35		0.447	19096	4.28094	0.375469	0.382	821	2.91434	0.494179
Tb927.11.2300	0.423		4157		137		0.411	19008	4.27894		0.447	815	2.91116
Tb927.10.9810	0.359		1265		36		0.393	18388	4.26453		0.385	789	2.89708
Tb927.6.1230	0.34		706		24		0.382	18221	4.26057		0.405	782	2.89321
Tb927.5.4370	0.308		535		72		0.404	17081	4.23251		0.434	769	2.88593
Tb927.6.3930	0.381		1111		45		0.384	16439	4.21588		0.456	756	2.87852
Tb927.11.4190	0.374		2762		36		0.387	16280	4.21165		0.357	742	2.8704
Tb927.3.3900	0.389		5033		161		0.415	15943	4.20257		0.438	713	2.85309
Tb927.2.2880	0.345		1326		56		0.429	15920	4.20194		0.47	694	2.84136
Tb927.4.2630	0.41		1641		22		0.397	14236	4.15339		0.397	681	2.83315
Tb927.10.9030	0.331		327		28		0.388	13840	4.14114		0.428	676	2.82995
Tb927.9.10790	0.346		1376		175		0.357	13799	4.13985		0.433	666	2.82347
Tb927.11.2650	0.411		19008		305		0.391	13750	4.1383		0.414	656	2.8169
Tb927.9.1960	0.387		3459		87		0.396	13712	4.1371		0.398	644	2.80889
Tb927.10.10000	0.331		28662		299		0.412	13623	4.13427		0.416	644	2.80889
Tb927.10.16070	0.383		1451		35		0.398	13480	4.12969		0.389	640	2.80618
Tb927.6.3540	0.336		1377		38		0.408	13386	4.12665		0.426	640	2.80618
Tb927.11.10480	0.355		3538		20		0.382	13362	4.12587		0.382	640	2.80618
Tb927.11.12680	0.406		2475		168		0.413	13249	4.12218		0.386	638	2.80482
Tb927.4.750	0.442		1670		164		0.418	13093	4.11704		0.379	635	2.80277
Tb927.11.6140	0.426		23106		505		0.337	13078	4.11654		0.456	634	2.80209
Tb927.5.3470	0.342		322		4		0.355	12913	4.11103		0.364	608	2.7839
Tb927.11.14760	0.334		1017		21		0.389	12491	4.0966		0.428	577	2.76118
Tb927.4.970	0.342		228		6		0.413	12265	4.08867		0.404	556	2.74507
Tb927.8.3580	0.336		897		16		0.404	12183	4.08575		0.39	541	2.7332
Tb927.10.13770	0.318		2208		102		0.495	11938	4.07693		0.396	541	2.7332
Tb927.10.2370	0.418		3731		176		0.388	11764	4.07056		0.41	529	2.72346
Tb927.10.1630	0.38		3582		101		0.453	11582	4.06378		0.426	505	2.70329
Tb927.7.7050	0.354		1792		25		0.396	10933	4.03874		0.457	505	2.70329
Tb927.10.2770	0.401		5520		222		0.438	10726	4.03044		0.386	502	2.7007
Tb927.3.1590	0.368		5587		63		0.371	10591	4.02494		0.407	495	2.69461
Tb927.10.510	0.34		1707		52		0.367	10580	4.02449		0.396	486	2.68664
Tb927.10.12330	0.403		4906		226		0.406	10534	4.02259		0.372	477	2.67852
Tb927.6.4440	0.404		17081		556		0.363	10345	4.01473		0.368	470	2.6721
Tb927.11.11460	0.371		10591		152		0.41	10297	4.01271		0.389	466	2.66839
Tb927.6.4150	0.309		390		29		0.349	10217	4.00932		0.372	465	2.66745
Tb927.11.570	0.327		1603		44		0.341	10101	4.00436		0.412	464	2.66652
Tb927.6.4190	0.331		543		6		0.413	9876	3.99458		0.398	458	2.66087
Tb927.11.12160	0.332		685		19		0.398	9814	3.99185		0.379	452	2.65514
Tb927.11.1570	0.373		176		11		0.424	9786	3.99061		0.387	448	2.65128
Tb927.6.4960	0.354		860		21		0.402	9747	3.98887		0.419	443	2.6464
Tb927.11.13500	0.398		13480		644		0.334	9691	3.98637		0.418	442	2.64542
Tb927.1.1370	0.341		2382		26		0.428	9634	3.98381		0.394	437	2.64048
Tb927.11.2510	0.381		3760		21		0.396	9608	3.98263		0.413	436	2.63949
Tb927.7.490	0.349		319		8		0.366	9594	3.982		0.385	431	2.63448
Tb927.7.660	0.365		947		17		0.402	9359	3.97123		0.393	430	2.63347
Tb927.10.470	0.348		2331		26		0.337	9333	3.97002		0.376	426	2.62941
Tb927.7.310	0.37		187		24		0.325	9163	3.96204		0.382	420	2.62325
Tb927.11.16020	0.407		1556		43		0.381	9109	3.95947		0.396	419	2.62221
Tb927.8.4540	0.406		8690		217		0.396	9067	3.95746		0.424	416	2.61909
Tb927.4.4680	0.363		266		26		0.387	8989	3.95371		0.431	415	2.61805
Tb927.10.11380	0.385		1600		39		0.425	8965	3.95255		0.391	409	2.61172
Tb927.11.350	0.34		1550		45		0.426	8845	3.9467		0.351	408	2.61066
Tb927.5.4040	0.387		1368		27		0.379	8828	3.94586		0.388	405	2.60746
Tb927.8.4640	0.439		2968		199		0.399	8798	3.94438		0.361	403	2.60531
Tb927.9.7800	0.336		1857		59		0.399	8749	3.94196		0.408	400	2.60206
Tb927.10.12700	0.413		12265		436		0.352	8716	3.94032		0.343	395	2.5966
Tb927.10.15370	0.355		1885		54		0.406	8690	3.93902		0.36	393	2.59439
Tb927.7.4950	0.351		2194		40		0.378	8668	3.93792		0.34	393	2.59439
Tb927.2.3780	0.404		6880		55		0.387	8579	3.93344		0.409	390	2.59106
Tb927.2.2920	0.297		774		6		0.372	8522	3.93054		0.361	389	2.58995
Tb927.9.13520	0.354		4115		34		0.371	8442	3.92645		0.376	388	2.58883
Tb927.11.14220	0.371		3226		253		0.379	8358	3.9221		0.404	386	2.58659
Tb927.11.14870	0.352		1118		45		0.36	8333	3.9208		0.339	386	2.58659
Tb927.11.15710	0.346		573		17		0.358	8224	3.91508		0.434	385	2.58546
Tb927.4.2310	0.396		9608		165		0.413	8123	3.90972		0.374	383	2.5832
Tb927.5.3890	0.349		760		4		0.372	8067	3.90671		0.354	383	2.5832
Tb927.10.3560	0.35		3229		98		0.367	8009	3.90358		0.373	383	2.5832
Tb927.11.4680	0.416		1826		39		0.364	8003	3.90325		0.413	375	2.57403
Tb927.1.1770	0.382		465		78		0.397	7981	3.90206		0.37	367	2.56467
Tb927.11.2790	0.378		1607		67		0.416	7975	3.90173		0.43	367	2.56467
Tb927.11.3830	0.363		1250		36		0.382	7962	3.90102		0.404	363	2.55991
Tb927.1.1420	0.369		2797		43		0.377	7956	3.90069		0.402	362	2.55871
Tb927.10.13740	0.379		3787		117		0.39	7915	3.89845		0.372	361	2.55751
Tb927.6.5100	0.348		1478		18		0.395	7892	3.89719		0.415	361	2.55751
Tb927.10.8790	0.359		2352		71		0.354	7879	3.89647		0.361	359	2.55509
Tb927.3.3130	0.363		10345		118		0.351	7846	3.89465		0.356	359	2.55509
Tb927.10.10310	0.341		674		15		0.425	7843	3.89448		0.416	357	2.55267
Tb927.3.3680	0.4		547		53		0.425	7789	3.89148		0.396	353	2.54777
Tb927.11.200	0.397		716		38		0.388	7708	3.88694		0.315	351	2.54531
Tb927.11.15480	0.413		1663		53		0.377	7575	3.87938		0.439	348	2.54158
Tb927.10.14330	0.409		2723		26		0.381	7554	3.87818		0.392	346	2.53908
Tb927.8.6660	0.41		10297		529		0.386	7546	3.87772		0.408	344	2.53656
Tb927.3.3660	0.355		1716		102		0.414	7455	3.87245		0.406	341	2.53275
Tb927.6.1530	0.353		1351		69		0.436	7435	3.87128		0.423	340	2.53148
Tb927.7.3040	0.338		5406		112		0.39	7371	3.86753		0.391	337	2.52763
Tb927.7.6790	0.331		1231		66		0.391	7356	3.86664		0.386	337	2.52763
Tb927.8.6380	0.363		1058		20		0.396	7283	3.86231		0.377	332	2.52114
Tb927.11.6750	0.34		382		4		0.382	7206	3.85769		0.427	332	2.52114
Tb927.10.15170	0.354		2408		43		0.377	7206	3.85769		0.399	327	2.51455
Tb927.5.3830	0.388		3403		188		0.434	7196	3.85709		0.398	322	2.50786
Tb927.7.650	0.354		6273		32		0.346	7142	3.85382		0.377	321	2.50651
Tb927.4.2410	0.356		1954		19		0.351	7134	3.85333		0.415	320	2.50515
Tb927.1.880	0.345		3539		9		0.355	7053	3.84837		0.389	320	2.50515
Tb927.1.2210	0.409		3816		152		0.387	6995	3.84479		0.385	319	2.50379
Tb927.10.1060	0.393		18388		430		0.41	6936	3.84111		0.399	316	2.49969
Tb927.11.14320	0.364		2263		211		0.381	6905	3.83916		0.411	315	2.49831
Tb927.3.5400	0.369		747		18		0.345	6903	3.83904		0.373	314	2.49693
Tb927.7.1630	0.364		1491		53		0.413	6883	3.83778		0.387	314	2.49693
Tb927.2.4400	0.38		3194		30		0.404	6880	3.83759		0.385	312	2.49415
Tb927.4.2320	0.378		1092		156		0.396	6832	3.83455		0.4	311	2.49276
Tb927.7.5620	0.33		690		6		0.404	6820	3.83378		0.347	311	2.49276
Tb927.9.10950	0.317		563		87		0.425	6819	3.83372		0.375	310	2.49136
Tb927.8.3340	0.348		1039		37		0.387	6809	3.83308		0.451	308	2.48855
Tb927.8.1420	0.332		2672		58		0.416	6782	3.83136		0.425	308	2.48855
Tb927.8.5990	0.351		1459		17		0.354	6714	3.82698		0.411	305	2.4843
Tb927.11.8040	0.372		1006		64		0.399	6706	3.82646		0.413	304	2.48287
Tb927.5.3120	0.392		3563		187		0.368	6695	3.82575		0.425	304	2.48287
Tb927.8.5490	0.387		2064		26		0.414	6685	3.8251		0.361	302	2.48001
Tb927.3.4160	0.403		1080		50		0.373	6645	3.82249		0.373	302	2.48001
Tb927.8.7810	0.337		65		1		0.378	6574	3.81783		0.331	299	2.47567
Tb927.11.14090	0.406		10534		341		0.391	6566	3.8173		0.404	299	2.47567
Tb927.2.2160	0.36		5834		393		0.447	6562	3.81704		0.417	299	2.47567
Tb927.11.2630	0.353		1006		11		0.411	6555	3.81657		0.399	298	2.47422
Tb927.8.2630	0.397		4558		103		0.34	6531	3.81498		0.398	297	2.47276
Tb927.8.4760	0.305		233		13		0.383	6524	3.81451		0.383	297	2.47276
Tb927.11.10780	0.366		1605		50		0.419	6514	3.81385		0.367	296	2.47129
Tb927.11.7740	0.373		1277		43		0.381	6505	3.81325		0.394	296	2.47129
Tb927.8.6570	0.344		77		2		0.382	6498	3.81278		0.388	294	2.46835
Tb927.4.3340	0.344		5		0		0.387	6445	3.80922		0.373	293	2.46687
Tb927.8.7170	0.349		3872		87		0.362	6407	3.80665		0.401	292	2.46538
Tb927.11.5060	0.376		844		13		0.369	6379	3.80475		0.346	290	2.4624
Tb927.9.15460	0.378		3805		191		0.376	6372	3.80428		0.35	290	2.4624
Tb927.11.11210	0.381		2045		184		0.375	6363	3.80366		0.371	290	2.4624
Tb927.3.4880	0.36		707		128		0.37	6337	3.80188		0.366	286	2.45637
Tb927.4.2180	0.456		19291		756		0.378	6337	3.80188		0.364	286	2.45637
Tb927.4.2360	0.371		1807		50		0.354	6273	3.79748		0.339	284	2.45332
Tb927.4.5130	0.403		845		18		0.482	6146	3.78859		0.353	284	2.45332
Tb927.7.3380	0.371		2416		41		0.328	6130	3.78746		0.425	283	2.45179
Tb927.6.5140	0.357		994		32		0.419	6093	3.78483		0.436	282	2.45025
Tb927.7.7410	0.341		1408		62		0.361	6021	3.77967		0.425	281	2.44871
Tb927.3.2380	0.343		138		23		0.347	6002	3.7783		0.458	280	2.44716
Tb927.10.13280	0.349		10217		36		0.371	6000	3.77815		0.431	280	2.44716
Tb927.10.1720	0.376		1769		32		0.391	5996	3.77786		0.411	278	2.44404
Tb927.5.1260	0.348		576		108		0.382	5980	3.7767		0.39	277	2.44248
Tb927.4.4630	0.366		684		32		0.402	5922	3.77247		0.425	272	2.43457
Tb927.7.5110	0.345		1957		17		0.341	5921	3.7724		0.394	272	2.43457
Tb927.8.3110	0.371		1052		40		0.339	5898	3.7707		0.369	271	2.43297
Tb927.3.860	0.368		6695		470		0.367	5878	3.76923		0.375	269	2.42975
Tb927.4.2260	0.429		803		67		0.339	5862	3.76805		0.391	269	2.42975
Tb927.11.7320	0.342		1007		27		0.375	5852	3.7673		0.371	265	2.42325
Tb927.6.3420	0.334		498		34		0.365	5842	3.76656		0.367	263	2.41996
Tb927.10.770	0.365		1256		43		0.371	5836	3.76612		0.374	262	2.4183
Tb927.11.10240	0.387		8989		260		0.36	5834	3.76597		0.396	262	2.4183
Tb927.4.2000	0.397		7981		123		0.37	5833	3.76589		0.377	262	2.4183
Tb927.11.8050	0.41		2651		56		0.397	5803	3.76365		0.404	261	2.41664
Tb927.10.2580	0.377		835		40		0.369	5757	3.7602		0.387	260	2.41497
Tb927.7.2360	0.395		5182		116		0.364	5700	3.75587		0.465	260	2.41497
Tb927.10.3320	0.328		376		13		0.367	5676	3.75404		0.387	259	2.4133
Tb927.9.6920	0.385		4011		252		0.413	5666	3.75328		0.345	259	2.4133
Tb927.3.1010	0.372		8067		361		0.396	5658	3.75266		0.369	258	2.41162
Tb927.6.3250	0.334		1343		34		0.416	5645	3.75166		0.366	258	2.41162
Tb927.2.5800	0.356		5177		94		0.366	5634	3.75082		0.295	254	2.40483
Tb927.8.2240	0.365		1195		19		0.368	5587	3.74718		0.36	254	2.40483
Tb927.8.3450	0.364		989		108		0.326	5560	3.74507		0.387	254	2.40483
Tb927.9.9730	0.376		1954		33		0.401	5520	3.74194		0.392	254	2.40483
Tb927.5.1090	0.411		19713		278		0.359	5513	3.74139		0.371	253	2.40312
Tb927.7.6310	0.39		1414		24		0.373	5502	3.74052		0.383	253	2.40312
Tb927.8.1490	0.422		1041		110		0.35	5494	3.73989		0.385	252	2.4014
Tb927.6.1990	0.405		1532		76		0.375	5476	3.73846		0.43	248	2.39445
Tb927.7.4910	0.366		5634		286		0.397	5471	3.73807		0.364	246	2.39094
Tb927.3.4260	0.352		1254		104		0.386	5455	3.73679		0.413	244	2.38739
Tb927.3.830	0.385		1707		66		0.367	5412	3.73336		0.429	244	2.38739
Tb927.9.15290	0.346		7142		91		0.338	5406	3.73288		0.351	244	2.38739
Tb927.11.8290	0.365		1971		24		0.35	5395	3.73199		0.402	242	2.38382
Tb927.8.3870	0.35		5494		40		0.357	5355	3.72876		0.389	241	2.38202
Tb927.5.2550	0.392		3039		94		0.342	5340	3.72754		0.402	240	2.38021
Tb927.5.3690	0.34		378		26		0.365	5324	3.72624		0.396	240	2.38021
Tb927.9.5890	0.364		5150		89		0.367	5309	3.72501		0.381	239	2.3784
Tb927.8.2010	0.337		342		24		0.427	5278	3.72247		0.41	239	2.3784
Tb927.11.2080	0.312		840		23		0.415	5257	3.72074		0.455	237	2.37475
Tb927.10.2550	0.345		837		27		0.388	5212	3.717		0.403	237	2.37475
Tb927.11.15510	0.348		583		15		0.395	5182	3.7145		0.386	236	2.37291
Tb927.3.3590	0.379		1583		21		0.356	5177	3.71408		0.361	236	2.37291
Tb927.3.4450	0.348		95		11		0.4	5175	3.71391		0.352	234	2.36922
Tb927.6.600	0.385		2059		221		0.456	5159	3.71257		0.357	234	2.36922
Tb927.10.16120	0.377		7575		332		0.365	5156	3.71231		0.376	233	2.36736
Tb927.11.1710	0.351		7846		408		0.364	5150	3.71181		0.408	233	2.36736
Tb927.3.3040	0.347		2447		126		0.352	5140	3.71096		0.325	231	2.36361
Tb927.8.2030	0.39		4981		277		0.346	5137	3.71071		0.383	231	2.36361
Tb927.10.14390	0.384		3637		78		0.381	5136	3.71063		0.358	231	2.36361
Tb927.8.4150	0.342		4354		85		0.399	5103	3.70783		0.345	230	2.36173
Tb927.9.7190	0.374		2628		57		0.357	5100	3.70757		0.422	228	2.35793
Tb927.9.8410	0.366		2784		74		0.369	5084	3.70621		0.359	227	2.35603
Tb927.3.2980	0.339		775		20		0.407	5073	3.70526		0.396	227	2.35603
Tb927.10.13620	0.388		1961		49		0.421	5062	3.70432		0.403	227	2.35603
Tb927.10.670	0.299		445		16		0.389	5033	3.70183		0.403	226	2.35411
Tb927.11.2840	0.374		2400		113		0.339	5015	3.70027		0.396	226	2.35411
Tb927.11.2120	0.359		2336		23		0.362	5007	3.69958		0.367	226	2.35411
Tb927.10.1580	0.36		1062		82		0.39	4981	3.69732		0.329	225	2.35218
Tb927.10.9920	0.356		1875		27		0.372	4967	3.69609		0.371	225	2.35218
Tb927.8.1860	0.371		2728		44		0.385	4963	3.69574		0.401	223	2.3483
Tb927.8.4450	0.387		2490		43		0.39	4952	3.69478		0.39	223	2.3483
Tb927.11.9450	0.362		1240		50		0.35	4919	3.69188		0.401	222	2.34635
Tb927.7.6090	0.388		11764		198		0.366	4913	3.69135		0.385	221	2.34439
Tb927.4.4600	0.391		1022		49		0.403	4906	3.69073		0.407	221	2.34439
Tb927.10.11440	0.323		4388		60		0.372	4893	3.68958		0.321	219	2.34044
Tb927.10.2620	0.413		2120		142		0.431	4857	3.68637		0.355	219	2.34044
Tb927.11.13510	0.392		1842		47		0.421	4852	3.68592		0.396	217	2.33646
Tb927.7.3520	0.352		3227		234		0.415	4851	3.68583		0.406	217	2.33646
Tb927.5.2660	0.378		1787		30		0.383	4846	3.68538		0.388	217	2.33646
Tb927.7.4620	0.411		1345		65		0.373	4779	3.67934		0.462	217	2.33646
Tb927.9.3540	0.416		1830		129		0.376	4773	3.67879		0.353	216	2.33445
Tb927.9.8740	0.453		11582		821		0.363	4742	3.67596		0.389	215	2.33244
Tb927.8.560	0.347		2394		48		0.39	4738	3.6756		0.387	213	2.32838
Tb927.11.4980	0.365		2179		27		0.359	4659	3.66829		0.414	213	2.32838
Tb927.11.9640	0.388		7708		123		0.378	4659	3.66829		0.364	211	2.32428
Tb927.2.4830	0.386		2399		52		0.353	4657	3.66811		0.35	211	2.32428
Tb927.5.460	0.368		544		11		0.315	4652	3.66764		0.316	211	2.32428
Tb927.10.2700	0.347		2228		21		0.387	4641	3.66661		0.38	210	2.32222
Tb927.3.4600	0.379		1641		31		0.356	4640	3.66652		0.382	210	2.32222
Tb927.8.2770	0.354		6714		20		0.424	4610	3.6637		0.382	209	2.32015
Tb927.11.14100	0.372		4893		203		0.333	4590	3.66181		0.378	208	2.31806
Tb927.4.4650	0.356		2307		43		0.384	4576	3.66049		0.408	207	2.31597
Tb927.7.3620	0.387		6995		74		0.397	4558	3.65877		0.396	207	2.31597
Tb927.7.5920	0.384		1107		29		0.403	4556	3.65858		0.345	207	2.31597
Tb927.11.17010	0.332		1518		188		0.394	4545	3.65753		0.34	207	2.31597
Tb927.4.1070	0.394		885		50		0.36	4536	3.65667		0.345	206	2.31387
Tb927.4.3320	0.391		2523		337		0.41	4504	3.6536		0.386	205	2.31175
Tb927.10.7390	0.328		964		90		0.369	4487	3.65196		0.359	205	2.31175
Tb927.7.3360	0.389		3868		122		0.392	4463	3.64963		0.372	203	2.3075
Tb927.11.800	0.378		3633		185		0.361	4451	3.64846		0.405	203	2.3075
Tb927.10.5550	0.37		1020		137		0.396	4435	3.64689		0.394	203	2.3075
Tb927.10.13270	0.358		2301		25		0.418	4400	3.64345		0.417	203	2.3075
Tb927.5.2520	0.344		1624		22		0.377	4398	3.64326		0.352	200	2.30103
Tb927.10.3640	0.339		3915		284		0.323	4388	3.64227		0.395	200	2.30103
Tb927.10.4040	0.322		2642		105		0.381	4383	3.64177		0.402	200	2.30103
Tb927.3.5060	0.376		3959		233		0.382	4376	3.64108		0.308	200	2.30103
Tb927.11.2580	0.307		3134		36		0.388	4374	3.64088		0.439	199	2.29885
Tb927.5.4100	0.34		1685		28		0.374	4355	3.63899		0.413	199	2.29885
Tb927.8.1740	0.363		3002		51		0.342	4354	3.63889		0.388	198	2.29667
Tb927.10.810	0.355		860		20		0.38	4346	3.63809		0.442	198	2.29667
Tb927.11.9080	0.396		2746		19		0.357	4342	3.63769		0.337	198	2.29667
Tb927.9.5190	0.381		6905		239		0.403	4328	3.63629		0.377	198	2.29667
Tb927.11.14980	0.377		1250		30		0.38	4328	3.63629		0.378	196	2.29226
Tb927.9.10960	0.36		1067		12		0.374	4312	3.63468		0.332	195	2.29003
Tb927.9.9300	0.362		1324		48		0.337	4277	3.63114		0.361	194	2.2878
Tb927.8.6080	0.334		1349		73		0.36	4250	3.62839		0.365	193	2.28556
Tb927.10.7570	0.413		9876		304		0.386	4249	3.62829		0.392	193	2.28556
Tb927.11.160	0.332		531		36		0.364	4225	3.62583		0.397	193	2.28556
Tb927.8.1410	0.356		2320		33		0.378	4222	3.62552		0.377	193	2.28556
Tb927.10.1660	0.341		971		48		0.345	4221	3.62542		0.368	193	2.28556
Tb927.10.4620	0.407		1229		107		0.384	4214	3.62469		0.365	193	2.28556
Tb927.3.5220	0.352		1362		56		0.366	4183	3.62149		0.306	192	2.2833
Tb927.1.4730	0.362		856		65		0.374	4173	3.62045		0.416	192	2.2833
Tb927.9.11880	0.394		918		44		0.364	4170	3.62014		0.378	191	2.28103
Tb927.10.400	0.318		384		27		0.423	4157	3.61878		0.428	191	2.28103
Tb927.11.11130	0.375		693		86		0.385	4123	3.61521		0.425	190	2.27875
Tb927.8.5330	0.391		1566		79		0.354	4115	3.61437		0.427	190	2.27875
Tb927.1.4250	0.327		461		13		0.408	4114	3.61426		0.392	189	2.27646
Tb927.11.16950	0.319		656		17		0.408	4105	3.61331		0.365	189	2.27646
Tb927.6.2680	0.313		304		28		0.361	4097	3.61247		0.385	189	2.27646
Tb927.11.15810	0.363		2403		63		0.388	4084	3.61109		0.388	188	2.27416
Tb927.2.5970	0.357		2895		83		0.382	4082	3.61087		0.332	188	2.27416
Tb927.5.470	0.337		13078		77		0.361	4070	3.60959		0.39	188	2.27416
Tb927.6.2650	0.369		1117		14		0.356	4061	3.60863		0.392	187	2.27184
Tb927.8.5630	0.357		2965		38		0.401	4053	3.60778		0.416	187	2.27184
Tb927.11.2010	0.356		1087		14		0.361	4051	3.60756		0.365	187	2.27184
Tb927.4.330	0.336		1510		17		0.371	4039	3.60627		0.364	187	2.27184
Tb927.7.2440	0.369		2817		83		0.357	4034	3.60574		0.406	186	2.26951
Tb927.9.6870	0.314		1604		97		0.39	4030	3.60531		0.378	185	2.26717
Tb927.10.1960	0.341		1288		15		0.352	4023	3.60455		0.405	185	2.26717
Tb927.4.1300	0.419		41280		1773		0.385	4011	3.60325		0.37	185	2.26717
Tb927.7.6180	0.349		1467		58		0.386	4008	3.60293		0.381	185	2.26717
Tb927.8.1140	0.339		895		58		0.32	3987	3.60065		0.348	185	2.26717
Tb927.6.3660	0.366		1168		19		0.341	3984	3.60032		0.381	184	2.26482
Tb927.7.2380	0.4		624		36		0.402	3982	3.6001		0.375	184	2.26482
Tb927.7.3100	0.388		1291		21		0.376	3959	3.59759		0.413	183	2.26245
Tb927.11.13180	0.391		7356		121		0.361	3952	3.59682		0.344	183	2.26245
Tb927.10.5660	0.367		932		31		0.444	3951	3.59671		0.413	182	2.26007
Tb927.5.1130	0.377		1207		121		0.378	3951	3.59671		0.364	182	2.26007
Tb927.5.2620	0.329		2662		225		0.376	3946	3.59616		0.378	182	2.26007
Tb927.6.4030	0.348		1178		54		0.385	3943	3.59583		0.381	182	2.26007
Tb927.10.2310	0.347		1295		15		0.407	3924	3.59373		0.401	182	2.26007
Tb927.7.4860	0.343		1005		34		0.428	3922	3.59351		0.426	181	2.25768
Tb927.4.4640	0.375		636		38		0.339	3915	3.59273		0.325	181	2.25768
Tb927.8.5860	0.43		1694		48		0.407	3908	3.59195		0.397	180	2.25527
Tb927.4.3850	0.343		3233		42		0.345	3886	3.5895		0.366	180	2.25527
Tb927.8.3070	0.351		716		43		0.349	3872	3.58794		0.343	180	2.25527
Tb927.11.10860	0.378		1987		51		0.398	3869	3.5876		0.39	179	2.25285
Tb927.2.2830	0.295		764		38		0.389	3868	3.58749		0.417	178	2.25042
Tb927.1.1400	0.344		722		24		0.422	3858	3.58636		0.351	178	2.25042
Tb927.7.5160	0.387		3796		113		0.39	3858	3.58636		0.417	177	2.24797
Tb927.7.5760	0.348		1684		149		0.392	3856	3.58614		0.418	176	2.24551
Tb927.10.1690	0.354		1341		65		0.363	3837	3.58399		0.346	175	2.24304
Tb927.10.3950	0.315		696		19		0.388	3836	3.58388		0.333	175	2.24304
Tb927.3.2970	0.322		426		20		0.392	3831	3.58331		0.458	175	2.24304
Tb927.11.16920	0.328		466		6		0.338	3829	3.58309		0.353	174	2.24055
Tb927.11.9970	0.34		484		31		0.341	3828	3.58297		0.391	174	2.24055
Tb927.8.5310	0.345		836		25		0.409	3816	3.58161		0.349	174	2.24055
Tb927.1.1390	0.377		844		49		0.364	3811	3.58104		0.361	174	2.24055
Tb927.8.1260	0.332		1246		8		0.378	3805	3.58035		0.403	173	2.23805
Tb927.11.9930	0.394		1822		72		0.37	3798	3.57955		0.367	172	2.23553
Tb927.10.4000	0.344		3482		45		0.387	3796	3.57933		0.399	172	2.23553
Tb927.11.4530	0.403		1640		82		0.379	3787	3.5783		0.398	172	2.23553
Tb927.3.3020	0.343		644		13		0.353	3785	3.57807		0.407	172	2.23553
Tb927.9.8380	0.374		1377		262		0.368	3762	3.57542		0.34	172	2.23553
Tb927.11.4950	0.32		1365		72		0.325	3761	3.5753		0.41	171	2.233
Tb927.7.7210	0.383		756		37		0.381	3760	3.57519		0.36	171	2.233
Tb927.11.15060	0.361		261		15		0.349	3752	3.57426		0.381	170	2.23045
Tb927.11.2640	0.373		1105		18		0.413	3745	3.57345		0.377	170	2.23045
Tb927.7.700	0.357		1974		16		0.421	3737	3.57252		0.388	170	2.23045
Tb927.7.7030	0.394		1275		48		0.418	3731	3.57183		0.419	169	2.22789
Tb927.10.6260	0.364		2231		33		0.398	3719	3.57043		0.373	169	2.22789
Tb927.11.17000	0.389		41109		640		0.427	3717	3.57019		0.406	168	2.22531
Tb927.9.9820	0.352		3125		200		0.353	3717	3.57019		0.371	168	2.22531
Tb927.11.15420	0.375		2620		269		0.38	3713	3.56972		0.425	167	2.22272
Tb927.10.6190	0.351		1954		32		0.361	3708	3.56914		0.422	166	2.22011
Tb927.7.4710	0.361		1515		43		0.392	3708	3.56914		0.379	166	2.22011
Tb927.10.10420	0.396		1233		72		0.387	3686	3.56656		0.369	166	2.22011
Tb927.9.7000	0.371		3242		143		0.383	3664	3.56396		0.381	166	2.22011
Tb927.6.850	0.433		1676		144		0.384	3637	3.56074		0.396	165	2.21748
Tb927.9.12820	0.379		1312		137		0.378	3633	3.56027		0.361	165	2.21748
Tb927.11.2940	0.358		974		17		0.34	3630	3.55991		0.442	164	2.21484
Tb927.3.2660	0.351		1188		14		0.352	3630	3.55991		0.407	164	2.21484
Tb927.11.7960	0.322		659		41		0.372	3619	3.55859		0.378	164	2.21484
Tb927.3.2600	0.385		20604		131		0.387	3614	3.55799		0.369	163	2.21219
Tb927.6.2510	0.371		998		150		0.373	3606	3.55703		0.413	162	2.20952
Tb927.7.2160	0.367		5676		296		0.383	3601	3.55642		0.373	162	2.20952
Tb927.7.890	0.328		1249		42		0.369	3599	3.55618		0.379	162	2.20952
Tb927.9.14420	0.349		1358		30		0.35	3597	3.55594		0.389	161	2.20683
Tb927.10.13180	0.359		3350		30		0.378	3589	3.55497		0.371	161	2.20683
Tb927.11.2900	0.319		474		41		0.388	3589	3.55497		0.466	160	2.20412
Tb927.10.2530	0.388		4084		294		0.392	3587	3.55473		0.398	160	2.20412
Tb927.11.240	0.342		810		12		0.38	3582	3.55413		0.386	159	2.2014
Tb927.7.4430	0.359		322		11		0.37	3580	3.55388		0.375	159	2.2014
Tb927.11.4920	0.405		1466		185		0.38	3578	3.55364		0.36	159	2.2014
Tb927.1.4680	0.344		1088		26		0.337	3570	3.55267		0.363	158	2.19866
Tb927.3.780	0.359		4659		227		0.373	3564	3.55194		0.398	158	2.19866
Tb927.10.1420	0.422		3858		75		0.392	3563	3.55182		0.403	158	2.19866
Tb927.10.16060	0.359		685		32		0.34	3556	3.55096		0.339	158	2.19866
Tb927.7.7440	0.323		998		114		0.341	3556	3.55096		0.384	157	2.1959
Tb927.11.10920	0.321		680		23		0.345	3539	3.54888		0.378	156	2.19312
Tb927.11.13240	0.355		464		13		0.355	3538	3.54876		0.367	155	2.19033
Tb927.9.5380	0.324		1356		40		0.364	3535	3.54839		0.38	154	2.18752
Tb927.11.10070	0.373		2309		139		0.408	3535	3.54839		0.365	153	2.18469
Tb927.3.1960	0.292		652		31		0.345	3526	3.54728		0.414	153	2.18469
Tb927.10.13820	0.333		924		58		0.347	3526	3.54728		0.371	152	2.18184
Tb927.8.5370	0.37		872		27		0.334	3511	3.54543		0.409	152	2.18184
Tb927.11.15360	0.371		349		24		0.343	3507	3.54494		0.356	152	2.18184
Tb927.11.9230	0.366		507		17		0.387	3503	3.54444		0.405	152	2.18184
Tb927.9.12410	0.365				193		0.404	3503	3.54444		0.34	152	2.18184
Tb927.9.8680	0.349		1369		40		0.351	3501	3.54419		0.382	152	2.18184
Tb927.4.830	0.314		324		45		0.385	3498	3.54382		0.419	151	2.17898
Tb927.6.2670	0.358		194		34		0.385	3494	3.54332		0.366	151	2.17898
Tb927.11.2560	0.332		203		12		0.365	3490	3.54283		0.444	151	2.17898
Tb927.6.690	0.336		479		138		0.344	3482	3.54183		0.388	151	2.17898
Tb927.7.5820	0.343		1834		37		0.457	3473	3.5407		0.415	151	2.17898
Tb927.11.4810	0.348		1042		85		0.387	3459	3.53895		0.435	151	2.17898
Tb927.3.3580	0.425		8965		283		0.362	3449	3.53769		0.371	150	2.17609
Tb927.5.1560	0.369		1747		18		0.374	3446	3.53732		0.385	150	2.17609
Tb927.10.4050	0.369		5757		258		0.374	3441	3.53668		0.428	150	2.17609
Tb927.11.6190	0.31		691		32		0.347	3441	3.53668		0.348	149	2.17319
Tb927.3.2990	0.331		506		19		0.356	3429	3.53517		0.395	149	2.17319
Tb927.6.1890	0.353		1084		28		0.43	3425	3.53466		0.387	149	2.17319
Tb927.8.6200	0.335		2092		20		0.366	3414	3.53326		0.437	149	2.17319
Tb927.9.5410	0.369		1585		142		0.36	3413	3.53314		0.356	149	2.17319
Tb927.10.9820	0.373		3564		65		0.388	3403	3.53186		0.384	148	2.17026
Tb927.6.2420	0.387		6809		259		0.365	3403	3.53186		0.386	148	2.17026
Tb927.7.190	0.325		9163		231		0.355	3399	3.53135		0.404	148	2.17026
Tb927.6.4200	0.338		1395		30		0.416	3398	3.53122		0.335	148	2.17026
Tb927.2.5950	0.362		1087		58		0.324	3385	3.52956		0.398	147	2.16732
Tb927.5.4310	0.359		1998		22		0.366	3380	3.52892		0.402	147	2.16732
Tb927.6.1860	0.35		1609		26		0.388	3378	3.52866		0.343	147	2.16732
Tb927.10.7920	0.348		698		55		0.378	3377	3.52853		0.392	147	2.16732
Tb927.11.13310	0.372		679		31		0.392	3376	3.5284		0.378	147	2.16732
Tb927.7.6990	0.356		1712		80		0.384	3362	3.5266		0.415	147	2.16732
Tb927.3.3750	0.334		9691		872		0.366	3361	3.52647		0.382	147	2.16732
Tb927.3.4020	0.342		1128		8		0.372	3357	3.52595		0.419	147	2.16732
Tb927.6.4470	0.374		4312		105		0.365	3354	3.52556		0.444	146	2.16435
Tb927.11.15120	0.338		1311		74		0.359	3350	3.52504		0.363	146	2.16435
Tb927.3.750	0.349		833		25		0.455	3345	3.5244		0.348	146	2.16435
Tb927.8.6090	0.365		1759		145		0.437	3340	3.52375		0.353	146	2.16435
Tb927.8.3260	0.327		387		32		0.378	3333	3.52284		0.365	145	2.16137
Tb927.10.7810	0.392		1513		25		0.357	3333	3.52284		0.341	145	2.16137
Tb927.11.12150	0.378		2419		67		0.425	3331	3.52257		0.382	145	2.16137
Tb927.11.1700	0.371		1516		33		0.355	3326	3.52192		0.374	145	2.16137
Tb927.10.4590	0.329		452		21		0.37	3325	3.52179		0.433	144	2.15836
Tb927.3.5240	0.366		1607		48		0.365	3323	3.52153		0.363	144	2.15836
Tb927.3.3100	0.405		417		57		0.328	3322	3.5214		0.378	144	2.15836
Tb927.10.1880	0.364		705		38		0.356	3321	3.52127		0.366	144	2.15836
Tb927.5.3170	0.361		2657		105		0.359	3319	3.52101		0.371	143	2.15534
Tb927.3.1820	0.398		1166		72		0.451	3315	3.52048		0.407	143	2.15534
Tb927.4.1380	0.317		572		18		0.392	3306	3.5193		0.37	143	2.15534
Tb927.7.4820	0.374		2805		107		0.353	3286	3.51667		0.383	143	2.15534
Tb927.6.4740	0.338		2927		39		0.361	3283	3.51627		0.413	142	2.15229
Tb927.1.3860	0.348		590		9		0.385	3274	3.51508		0.369	142	2.15229
Tb927.11.16930	0.339		536		12		0.38	3271	3.51468		0.421	142	2.15229
Tb927.4.1880	0.319		1381		83		0.333	3266	3.51402		0.396	142	2.15229
Tb927.11.5250	0.34		2627		22		0.338	3259	3.51308		0.336	142	2.15229
Tb927.3.3880	0.367		2230		113		0.371	3242	3.51081		0.421	142	2.15229
Tb927.10.9890	0.334		2478		35		0.34	3240	3.51055		0.36	141	2.14922
Tb927.9.14410	0.339		1922		15		0.377	3234	3.50974		0.436	141	2.14922
Tb927.1.3070	0.405		2814		90		0.343	3233	3.50961		0.379	141	2.14922
Tb927.7.2600	0.422		1631		73		0.412	3230	3.5092		0.407	141	2.14922
Tb927.9.4080	0.361		3283		77		0.35	3229	3.50907		0.363	141	2.14922
Tb927.10.430	0.346		1027		34		0.352	3227	3.5088		0.353	140	2.14613
Tb927.11.5820	0.36		8333		254		0.371	3226	3.50866		0.355	140	2.14613
Tb927.8.4500	0.391		2693		96		0.414	3219	3.50772		0.373	139	2.14301
Tb927.11.10170	0.327		1630		70		0.367	3210	3.50651		0.385	139	2.14301
Tb927.3.1910	0.363		992		54		0.343	3209	3.50637		0.355	139	2.14301
Tb927.5.3680	0.302		497		15		0.38	3194	3.50433		0.429	139	2.14301
Tb927.11.10330	0.362		2160		72		0.365	3187	3.50338		0.39	139	2.14301
Tb927.11.13800	0.301		235		37		0.385	3179	3.50229		0.417	139	2.14301
Tb927.7.4420	0.402		5922		240		0.389	3170	3.50106		0.385	139	2.14301
Tb927.5.2280	0.335		1607		33		0.394	3167	3.50065		0.336	138	2.13988
Tb927.8.4310	0.348		443		28		0.344	3163	3.5001		0.424	138	2.13988
Tb927.10.7230	0.362		6407		97		0.373	3154	3.49886		0.388	138	2.13988
Tb927.11.12760	0.322		251		7		0.324	3145	3.49762		0.401	138	2.13988
Tb927.8.5160	0.328		140		1		0.34	3141	3.49707		0.399	138	2.13988
Tb927.10.920	0.389		1080		26		0.307	3134	3.4961		0.423	137	2.13672
Tb927.2.2130	0.36		1098		54		0.371	3130	3.49554		0.37	137	2.13672
Tb927.1.3820	0.444		565		124		0.352	3125	3.49485		0.379	137	2.13672
Tb927.11.10960	0.386		1718		41		0.388	3121	3.49429		0.379	137	2.13672
Tb927.3.4480	0.345		162		62		0.361	3116	3.4936		0.365	137	2.13672
Tb927.8.1430	0.35		1476		57		0.357	3115	3.49346		0.394	137	2.13672
Tb927.11.2020	0.351		1085		31		0.374	3114	3.49332		0.42	137	2.13672
Tb927.6.4220	0.359		715		31		0.406	3105	3.49206		0.375	137	2.13672
Tb927.11.5840	0.466		2669		160		0.379	3102	3.49164		0.401	137	2.13672
Tb927.10.10390	0.404		12183		299		0.369	3101	3.4915		0.405	136	2.13354
Tb927.10.4540	0.365		185		17		0.386	3096	3.4908		0.381	136	2.13354
Tb927.10.14790	0.408		13386		400		0.388	3089	3.48982		0.367	136	2.13354
Tb927.10.6320	0.359		2505		21		0.363	3088	3.48968		0.383	136	2.13354
Tb927.10.9260	0.351		911		47		0.354	3080	3.48855		0.434	135	2.13033
Tb927.6.4000	0.413		5666		244		0.353	3078	3.48827		0.324	135	2.13033
Tb927.1.2710	0.347		256		20		0.402	3073	3.48756		0.384	135	2.13033
Tb927.1.4280	0.325		397		25		0.367	3053	3.48473		0.376	134	2.1271
Tb927.11.13280	0.37		6337		367		0.345	3052	3.48458		0.373	134	2.1271
Tb927.4.4070	0.365		3187		106		0.361	3041	3.48302		0.392	134	2.1271
Tb927.5.1790	0.343		2042		28		0.361	3040	3.48287		0.387	134	2.1271
Tb927.6.4040	0.368		1235		70		0.346	3040	3.48287		0.397	134	2.1271
Tb927.11.5830	0.387		885		24		0.392	3039	3.48273		0.348	134	2.1271
Tb927.5.3300	0.448		994		133		0.364	3037	3.48244		0.448	133	2.12385
Tb927.5.3400	0.381		9109		170		0.332	3037	3.48244		0.415	133	2.12385
Tb927.10.9200	0.347		1151		14		0.361	3035	3.48216		0.409	133	2.12385
Tb927.11.6700	0.367		1109		99		0.425	3026	3.48087		0.35	133	2.12385
Tb927.4.1270	0.421		5062		142		0.336	3024	3.48058		0.35	133	2.12385
Tb927.6.3920	0.362		584		80		0.334	3020	3.48001		0.384	132	2.12057
Tb927.7.3510	0.396		728		17		0.377	3016	3.47943		0.345	132	2.12057
Tb927.10.8200	0.365		1324		66		0.357	3013	3.479		0.39	132	2.12057
Tb927.11.10040	0.31		1854		92		0.381	3008	3.47828		0.312	132	2.12057
Tb927.6.2490	0.386		3096		236		0.363	3002	3.47741		0.385	131	2.11727
Tb927.9.11050	0.392		4463		193		0.43	2994	3.47625		0.352	131	2.11727
Tb927.10.1440	0.375		678		41		0.367	2971	3.4729		0.4	131	2.11727
Tb927.11.14010	0.3		98		6		0.444	2970	3.47276		0.397	131	2.11727
Tb927.1.3910	0.338		1135		29		0.439	2968	3.47246		0.378	131	2.11727
Tb927.11.1600	0.341		614		13		0.357	2965	3.47202		0.363	131	2.11727
Tb927.6.840	0.359		1950		112		0.357	2958	3.471		0.375	131	2.11727
Tb927.9.12150	0.344		687		56		0.365	2954	3.47041		0.385	131	2.11727
Tb927.10.14250	0.372		444		15		0.345	2952	3.47012		0.402	130	2.11394
Tb927.3.1710	0.382		1115		45		0.353	2950	3.46982		0.385	129	2.11059
Tb927.7.680	0.346		1104		11		0.371	2950	3.46982		0.416	129	2.11059
Tb927.8.3850	0.368		1296		59		0.368	2948	3.46953		0.377	129	2.11059
Tb927.9.4310	0.341		5921		145		0.349	2946	3.46923		0.358	129	2.11059
Tb927.1.1210	0.408		840		32		0.401	2930	3.46687		0.36	129	2.11059
Tb927.10.4810	0.377		804		53		0.338	2927	3.46642		0.36	128	2.10721
Tb927.7.1800	0.356		859		42		0.329	2926	3.46627		0.372	128	2.10721
Tb927.1.2670	0.361		4051		302		0.338	2924	3.46598		0.391	128	2.10721
Tb927.9.8290	0.379		1024		60		0.409	2919	3.46523		0.345	128	2.10721
Tb927.10.5110	0.315		479		28		0.407	2917	3.46494		0.368	128	2.10721
Tb927.3.2860	0.331		196		18		0.331	2912	3.46419		0.405	128	2.10721
Tb927.7.2330	0.362		2483		24		0.359	2910	3.46389		0.358	128	2.10721
Tb927.7.3200	0.399		1669		17		0.348	2910	3.46389		0.383	127	2.1038
Tb927.7.4780	0.362		1126		107		0.357	2895	3.46165		0.384	127	2.1038
Tb927.11.15820	0.372		2785		85		0.419	2891	3.46105		0.364	127	2.1038
Tb927.2.2230	0.384		2852		51		0.342	2886	3.4603		0.377	127	2.1038
Tb927.2.2540	0.372		1257		30		0.344	2885	3.46015		0.383	127	2.1038
Tb927.10.12540	0.344		1923		63		0.41	2885	3.46015		0.363	127	2.1038
Tb927.11.12030	0.332		914		22		0.413	2881	3.45954		0.347	126	2.10037
Tb927.3.1600	0.413		1387		162		0.39	2878	3.45909		0.357	126	2.10037
Tb927.6.710	0.326		573		18		0.439	2872	3.45818		0.438	126	2.10037
Tb927.10.5200	0.367		1042		25		0.417	2866	3.45728		0.39	126	2.10037
Tb927.8.5510	0.381		972		41		0.363	2864	3.45697		0.376	125	2.09691
Tb927.11.7170	0.416		7975		187		0.408	2854	3.45545		0.415	125	2.09691
Tb927.9.1380	0.39		1258		78		0.36	2853	3.4553		0.382	125	2.09691
Tb927.10.11020	0.372		2185		19		0.384	2852	3.45515		0.418	125	2.09691
Tb927.11.15830	0.334		1226		9		0.367	2844	3.45393		0.394	125	2.09691
Tb927.4.1600	0.359		1184		51		0.345	2833	3.45225		0.317	125	2.09691
Tb927.10.4130	0.413		2881		83		0.402	2827	3.45133		0.405	125	2.09691
Tb927.11.6600	0.361		3035		359		0.394	2826	3.45117		0.405	125	2.09691
Tb927.6.4080	0.393		942		74		0.329	2825	3.45102		0.444	124	2.09342
Tb927.11.3860	0.339		1275		56		0.434	2824	3.45086		0.394	124	2.09342
Tb927.8.6640	0.379		2667		91		0.345	2824	3.45086		0.339	124	2.09342
Tb927.6.670	0.351		1027		27		0.385	2819	3.4501		0.377	124	2.09342
Tb927.7.4340	0.374		1934		19		0.369	2817	3.44979		0.319	124	2.09342
Tb927.10.230	0.386		4249		205		0.364	2816	3.44963		0.327	124	2.09342
Tb927.10.6220	0.361		2476		21		0.405	2814	3.44932		0.397	123	2.08991
Tb927.11.660	0.324		430		9		0.374	2805	3.44793		0.388	123	2.08991
Tb927.10.15150	0.387		756		22		0.337	2802	3.44747		0.382	123	2.08991
Tb927.8.4630	0.303		813		16		0.369	2797	3.44669		0.381	123	2.08991
Tb927.10.380	0.397		1519		45		0.391	2792	3.44592		0.303	123	2.08991
Tb927.11.15130	0.38		2526		154		0.341	2792	3.44592		0.395	123	2.08991
Tb927.11.1150	0.408		2008		207		0.361	2789	3.44545		0.363	123	2.08991
Tb927.11.7100	0.397		1863		68		0.385	2787	3.44514		0.339	123	2.08991
Tb927.1.2750	0.407		2037		164		0.372	2785	3.44483		0.363	123	2.08991
Tb927.10.5500	0.387		880		64		0.366	2784	3.44467		0.408	123	2.08991
Tb927.3.3610	0.326		5560		107		0.363	2782	3.44436		0.389	122	2.08636
Tb927.10.9210	0.349		323		11		0.383	2780	3.44404		0.372	122	2.08636
Tb927.10.9990	0.38		955		49		0.325	2776	3.44342		0.409	122	2.08636
Tb927.11.12320	0.358		1936		21		0.374	2762	3.44122		0.341	122	2.08636
Tb927.9.10000	0.434		542		98		0.351	2756	3.44028		0.388	122	2.08636
Tb927.9.10580	0.324		859		35		0.344	2752	3.43965		0.391	121	2.08279
Tb927.11.15700	0.377		628		45		0.335	2749	3.43917		0.377	121	2.08279
Tb927.3.2830	0.387		1404		26		0.355	2749	3.43917		0.358	121	2.08279
Tb927.6.1200	0.334		1601		20		0.382	2749	3.43917		0.354	121	2.08279
Tb927.9.13130	0.36		370		6		0.396	2746	3.4387		0.424	121	2.08279
Tb927.10.11650	0.401		331		61		0.375	2733	3.43664		0.483	121	2.08279
Tb927.10.7930	0.418		13093		442		0.371	2728	3.43584		0.37	121	2.08279
Tb927.11.10570	0.366		832		46		0.409	2723	3.43505		0.338	120	2.07918
Tb927.11.2260	0.395		1863		200		0.361	2705	3.43217		0.377	120	2.07918
Tb927.10.2050	0.311		547		9		0.323	2701	3.43152		0.346	120	2.07918
Tb927.7.4310	0.364		1240		23		0.368	2698	3.43104		0.39	120	2.07918
Tb927.10.14700	0.392		3831		346		0.34	2698	3.43104		0.333	119	2.07555
Tb927.1.1200	0.412		747		30		0.295	2696	3.43072		0.362	119	2.07555
Tb927.10.10010	0.411		1671		75		0.335	2696	3.43072		0.371	119	2.07555
Tb927.10.13800	0.385		2156		86		0.321	2695	3.43056		0.346	119	2.07555
Tb927.11.12440	0.36		1408		48		0.391	2693	3.43024		0.363	118	2.07188
Tb927.3.1700	0.366		187		25		0.397	2690	3.42975		0.391	118	2.07188
Tb927.8.2670	0.371		654		51		0.383	2687	3.42927		0.399	118	2.07188
Tb927.1.3400	0.34		573		21		0.386	2677	3.42765		0.351	118	2.07188
Tb927.6.1700	0.37		1977		53		0.403	2676	3.42749		0.379	117	2.06819
Tb927.7.520	0.351		132		21		0.332	2672	3.42684		0.417	117	2.06819
Tb927.11.10440	0.376		436		21		0.386	2671	3.42667		0.401	117	2.06819
Tb927.7.2570	0.352		4023		131		0.466	2669	3.42635		0.4	117	2.06819
Tb927.11.6850	0.339		546		22		0.318	2668	3.42619		0.395	116	2.06446
Tb927.11.9590	0.419		96554		1885		0.379	2667	3.42602		0.429	116	2.06446
Tb927.10.13830	0.387		1875		68		0.358	2664	3.42553		0.382	116	2.06446
Tb927.10.14860	0.381		1778		58		0.329	2662	3.42521		0.33	116	2.06446
Tb927.7.3140	0.395		1232		39		0.361	2657	3.42439		0.374	116	2.06446
Tb927.5.820	0.314		418		32		0.41	2651	3.42341		0.302	115	2.0607
Tb927.7.1080	0.394		1035		21		0.356	2651	3.42341		0.38	115	2.0607
Tb927.7.2580	0.317		885		14		0.419	2650	3.42325		0.322	115	2.0607
Tb927.8.5880	0.434		2824		385		0.368	2649	3.42308		0.326	115	2.0607
Tb927.3.2440	0.388		1126		97		0.322	2642	3.42193		0.371	115	2.0607
Tb927.7.6340	0.358		1826		121		0.378	2636	3.42095		0.441	115	2.0607
Tb927.9.9840	0.389		3170		241		0.342	2635	3.42078		0.39	115	2.0607
Tb927.8.5600	0.366		4913		258		0.345	2630	3.41996		0.323	114	2.0569
Tb927.9.8260	0.359		2910		76		0.374	2628	3.41963		0.338	114	2.0569
Tb927.11.2800	0.355		373		29		0.34	2627	3.41946		0.387	114	2.0569
Tb927.8.3780	0.366		1102		57		0.375	2620	3.4183		0.3	114	2.0569
Tb927.1.1620	0.342		1486		15		0.379	2617	3.4178		0.43	114	2.0569
Tb927.11.3270	0.351		2213		37		0.382	2614	3.41731		0.374	113	2.05308
Tb927.7.4880	0.354		2298		43		0.378	2613	3.41714		0.387	113	2.05308
Tb927.10.11370	0.442		572		49		0.419	2612	3.41697		0.367	113	2.05308
Tb927.11.7450	0.362		844		13		0.354	2601	3.41514		0.362	113	2.05308
Tb927.11.9660	0.292		466		11		0.357	2595	3.41414		0.388	113	2.05308
Tb927.3.2370	0.447		969		101		0.342	2595	3.41414		0.326	113	2.05308
Tb927.9.12330	0.384		768		132		0.367	2585	3.41246		0.338	112	2.04922
Tb927.9.7070	0.31		1190		27		0.391	2584	3.41229		0.359	112	2.04922
Tb927.11.7770	0.365		938		12		0.358	2578	3.41128		0.398	112	2.04922
Tb927.3.4960	0.353		1852		11		0.354	2564	3.40892		0.395	112	2.04922
Tb927.7.4800	0.355		836		76		0.364	2560	3.40824		0.351	112	2.04922
Tb927.10.3180	0.314		231		8		0.387	2558	3.4079		0.339	112	2.04922
Tb927.8.1770	0.345		1063		19		0.302	2554	3.40722		0.305	112	2.04922
Tb927.9.13340	0.393		1233		37		0.39	2550	3.40654		0.373	112	2.04922
Tb927.11.6470	0.354		781		55		0.405	2546	3.40586		0.343	112	2.04922
Tb927.8.1730	0.327		241		18		0.401	2535	3.40398		0.383	112	2.04922
Tb927.10.7450	0.36		1105		35		0.364	2531	3.40329		0.381	112	2.04922
Tb927.6.830	0.325		213		16		0.38	2526	3.40243		0.361	112	2.04922
Tb927.11.5140	0.368		2437		76		0.341	2526	3.40243		0.382	111	2.04532
Tb927.7.2310	0.351		714		21		0.368	2525	3.40226		0.346	111	2.04532
Tb927.8.1040	0.334		453		57		0.391	2523	3.40192		0.367	111	2.04532
Tb927.6.1470	0.345		3526		230		0.332	2521	3.40157		0.418	111	2.04532
Tb927.10.15330	0.35		1831		95		0.357	2517	3.40088		0.357	111	2.04532
Tb927.5.1080	0.371		575		16		0.316	2515	3.40054		0.422	110	2.04139
Tb927.6.3470	0.341		856		64		0.397	2510	3.39967		0.391	110	2.04139
Tb927.7.1910	0.373		5502		53		0.359	2505	3.39881		0.34	110	2.04139
Tb927.11.2620	0.355		1202		44		0.388	2505	3.39881		0.418	110	2.04139
Tb927.5.1590	0.341		556		53		0.358	2503	3.39846		0.397	110	2.04139
Tb927.8.5030	0.348		1718		98		0.413	2501	3.39811		0.365	110	2.04139
Tb927.9.13770	0.345		432		57		0.359	2500	3.39794		0.376	110	2.04139
Tb927.11.8100	0.388		591		26		0.322	2492	3.39655		0.347	110	2.04139
Tb927.5.480	0.312		221		81		0.387	2490	3.3962		0.35	109	2.03743
Tb927.11.14120	0.383		4846		127		0.369	2489	3.39602		0.41	109	2.03743
Tb927.4.5080	0.348		1288		58		0.379	2486	3.3955		0.344	109	2.03743
Tb927.5.3410	0.388		1206		36		0.36	2486	3.3955		0.369	109	2.03743
Tb927.8.5350	0.365		72		21		0.386	2485	3.39533		0.328	109	2.03743
Tb927.11.15940	0.336		1774		11		0.362	2483	3.39498		0.413	109	2.03743
Tb927.3.2250	0.356		84		4		0.398	2483	3.39498		0.348	108	2.03342
Tb927.7.3550	0.396		36577		486		0.337	2481	3.39463		0.364	108	2.03342
Tb927.9.13990	0.416		5645		357		0.348	2481	3.39463		0.356	108	2.03342
Tb927.11.10080	0.376		991		52		0.336	2480	3.39445		0.385	108	2.03342
Tb927.11.4130	0.378		3589		96		0.334	2478	3.3941		0.412	108	2.03342
Tb927.9.2120	0.363		931		21		0.413	2477	3.39393		0.392	108	2.03342
Tb927.9.5280	0.386				34		0.361	2476	3.39375		0.355	108	2.03342
Tb927.9.9450	0.382		7962		111		0.406	2475	3.39358		0.424	108	2.03342
Tb927.11.9540	0.351		549		15		0.384	2474	3.3934		0.361	108	2.03342
Tb927.4.5200	0.414		3219		50		0.368	2474	3.3934		0.407	107	2.02938
Tb927.8.1980	0.342		1673		34		0.387	2467	3.39217		0.374	107	2.02938
Tb927.10.3230	0.345		979		63		0.326	2467	3.39217		0.362	107	2.02938
Tb927.10.600	0.385		1642		32		0.414	2466	3.39199		0.326	107	2.02938
Tb927.5.680	0.357		316		16		0.381	2465	3.39182		0.407	107	2.02938
Tb927.5.840	0.399		1042		11		0.378	2462	3.39129		0.357	107	2.02938
Tb927.11.2670	0.372		3357		122		0.403	2458	3.39058		0.308	107	2.02938
Tb927.11.3100	0.337		1664		40		0.356	2452	3.38952		0.371	107	2.02938
Tb927.7.1500	0.383		2285		56		0.415	2451	3.38934		0.408	107	2.02938
Tb927.8.4250	0.4		672		23		0.347	2447	3.38863		0.365	106	2.02531
Tb927.11.10100	0.338		1463		114		0.368	2446	3.38846		0.383	106	2.02531
Tb927.5.520	0.338		2924		58		0.368	2437	3.38686		0.426	106	2.02531
Tb927.7.1700	0.335		1316		11		0.364	2435	3.3865		0.382	106	2.02531
Tb927.3.5050	0.405		72501		782		0.384	2428	3.38525		0.349	106	2.02531
Tb927.8.1030	0.311		369		15		0.37	2423	3.38435		0.387	106	2.02531
Tb927.11.9480	0.361		601		31		0.34	2421	3.38399		0.348	106	2.02531
Tb927.7.2780	0.346		1307		290		0.349	2420	3.38382		0.322	105	2.02119
Tb927.10.12620	0.356		1484		47		0.378	2419	3.38364		0.374	105	2.02119
Tb927.10.2750	0.356		578		15		0.371	2416	3.3831		0.361	105	2.02119
Tb927.11.12350	0.356		349		5		0.375	2416	3.3831		0.325	105	2.02119
Tb927.11.5330	0.305		603		7		0.326	2415	3.38292		0.377	105	2.02119
Tb927.11.6090	0.36		1203		22		0.368	2414	3.38274		0.347	105	2.02119
Tb927.7.4400	0.346		535		16		0.349	2414	3.38274		0.407	105	2.02119
Tb927.10.5420	0.319		424		2		0.368	2411	3.3822		0.368	105	2.02119
Tb927.11.7390	0.4		892		46		0.354	2408	3.38166		0.396	105	2.02119
Tb927.10.6440	0.382		1637		81		0.363	2403	3.38075		0.388	105	2.02119
Tb927.7.5720	0.338		827		21		0.374	2400	3.38021		0.381	105	2.02119
Tb927.10.11350	0.379		611		75		0.386	2399	3.38003		0.371	105	2.02119
Tb927.5.2640	0.322		1451		63		0.391	2398	3.37985		0.388	105	2.02119
Tb927.5.2530	0.374		4173		35		0.373	2396	3.37949		0.377	105	2.02119
Tb927.7.2620	0.417		1261		39		0.376	2395	3.37931		0.392	105	2.02119
Tb927.9.14290	0.333		4590		119		0.397	2395	3.37931		0.337	105	2.02119
Tb927.10.640	0.335		1014		10		0.347	2394	3.37912		0.361	105	2.02119
Tb927.11.13830	0.324		418		22		0.365	2394	3.37912		0.352	104	2.01703
Tb927.8.1080	0.419		1143		89		0.341	2382	3.37694		0.371	104	2.01703
Tb927.10.9780	0.387		1402		19		0.374	2382	3.37694		0.325	104	2.01703
Tb927.11.12490	0.337		703		19		0.428	2382	3.37694		0.357	104	2.01703
Tb927.11.2240	0.335		496		45		0.356	2382	3.37694		0.368	104	2.01703
Tb927.7.1290	0.38		4346		210		0.397	2380	3.37658		0.373	104	2.01703
Tb927.3.2160	0.354		117		5		0.364	2375	3.37566		0.345	104	2.01703
Tb927.6.4430	0.338		2342		41		0.417	2374	3.37548		0.359	104	2.01703
Tb927.9.8500	0.332		1067		17		0.396	2372	3.37511		0.371	103	2.01284
Tb927.9.9080	0.394		744		46		0.346	2368	3.37438		0.397	103	2.01284
Tb927.10.12410	0.363		2198		158		0.329	2367	3.3742		0.375	103	2.01284
Tb927.11.12220	0.377		2209		41		0.392	2359	3.37273		0.405	103	2.01284
Tb927.11.14850	0.337		267		16		0.355	2357	3.37236		0.372	103	2.01284
Tb927.11.2160	0.398		1701		112		0.393	2356	3.37218		0.402	103	2.01284
Tb927.5.4270	0.369		1309		24		0.359	2352	3.37144		0.344	103	2.01284
Tb927.8.680	0.364		370		19		0.367	2352	3.37144		0.318	102	2.0086
Tb927.1.4040	0.358		595		23		0.356	2351	3.37125		0.355	102	2.0086
Tb927.4.3670	0.336		2480		37		0.371	2350	3.37107		0.409	102	2.0086
Tb927.10.2240	0.401		4053		223		0.374	2345	3.37014		0.438	102	2.0086
Tb927.11.16610	0.346		1556		56		0.338	2342	3.36959		0.363	102	2.0086
Tb927.9.14070	0.312		1024		46		0.359	2336	3.36847		0.384	102	2.0086
Tb927.3.970	0.359		863		17		0.362	2336	3.36847		0.37	102	2.0086
Tb927.8.5610	0.348		467		19		0.348	2331	3.36754		0.34	102	2.0086
Tb927.11.11770	0.376		3946		134		0.38	2331	3.36754		0.367	102	2.0086
Tb927.6.2230	0.393		2356		52		0.325	2330	3.36736		0.397	102	2.0086
Tb927.11.9210	0.349		2091		20		0.345	2324	3.36624		0.398	102	2.0086
Tb927.2.4870	0.337		879		50		0.35	2322	3.36586		0.367	102	2.0086
Tb927.1.1220	0.383		738		34		0.356	2320	3.36549		0.38	101	2.00432
Tb927.11.11300	0.374		1022		64		0.385	2319	3.3653		0.447	101	2.00432
Tb927.5.3780	0.328		508		81		0.351	2317	3.36493		0.389	101	2.00432
Tb927.8.4950	0.365		3323		27		0.375	2316	3.36474		0.337	101	2.00432
Tb927.1.1150	0.337		457		13		0.36	2316	3.36474		0.345	101	2.00432
Tb927.10.3790	0.344		2885		13		0.367	2310	3.36361		0.368	101	2.00432
Tb927.10.7020	0.383		1102		58		0.373	2309	3.36342		0.387	101	2.00432
Tb927.11.1620	0.398		2124		147		0.356	2307	3.36305		0.337	101	2.00432
Tb927.5.4120	0.428		1148		42		0.331	2305	3.36267		0.383	101	2.00432
Tb927.9.15330	0.333		1499		14		0.358	2301	3.36192		0.365	101	2.00432
Tb927.11.550	0.438		10726		713		0.354	2298	3.36135		0.376	101	2.00432
Tb927.1.3840	0.337		372		9		0.371	2293	3.3604		0.349	100	2
Tb927.10.6800	0.419		2612		73		0.342	2291	3.36003		0.307	100	2
Tb927.10.3900	0.364		1395		29		0.375	2290	3.35984		0.374	100	2
Tb927.3.660	0.307		201		5		0.341	2289	3.35965		0.424	100	2
Tb927.10.5630	0.353		737		174		0.365	2287	3.35927		0.364	100	2
Tb927.5.3210	0.442		1526		198		0.383	2285	3.35889		0.355	100	2
Tb927.6.2070	0.361		606		11		0.401	2276	3.35717		0.379	100	2
Tb927.7.640	0.344		1926		49		0.353	2275	3.35698		0.365	100	2
Tb927.9.12090	0.322		1918		18		0.364	2269	3.35583		0.367	99	1.99564
Tb927.10.9050	0.342		1195		23		0.351	2264	3.35488		0.353	99	1.99564
Tb927.11.3890	0.349		805		10		0.364	2263	3.35468		0.359	99	1.99564
Tb927.11.610	0.373		948		134		0.409	2263	3.35468		0.388	99	1.99564
Tb927.2.4420	0.315		613		8		0.43	2260	3.35411		0.4	99	1.99564
Tb927.11.490	0.301		157		44		0.343	2256	3.35334		0.365	99	1.99564
Tb927.3.3710	0.36		784		27		0.356	2255	3.35315		0.309	99	1.99564
Tb927.6.4020	0.404		3503		386		0.391	2253	3.35276		0.35	98	1.99123
Tb927.9.6650	0.351		2204		31		0.387	2252	3.35257		0.434	98	1.99123
Tb927.2.5240	0.338		3829		52		0.33	2251	3.35238		0.348	98	1.99123
Tb927.1.1680	0.354		425		43		0.378	2245	3.35122		0.367	98	1.99123
Tb927.3.4050	0.331		767		33		0.358	2245	3.35122		0.357	98	1.99123
Tb927.10.6280	0.34		365		25		0.336	2242	3.35064		0.343	98	1.99123
Tb927.1.690	0.321		635		66		0.322	2242	3.35064		0.402	97	1.98677
Tb927.11.2610	0.438		21406		985		0.422	2240	3.35025		0.314	97	1.98677
Tb927.11.7850	0.319		406		43		0.378	2239	3.35005		0.362	97	1.98677
Tb927.10.3510	0.336		757		8		0.318	2239	3.35005		0.388	97	1.98677
Tb927.11.7830	0.343		251		13		0.362	2239	3.35005		0.367	97	1.98677
Tb927.11.7860	0.355		741		19		0.387	2237	3.34967		0.312	97	1.98677
Tb927.7.5490	0.397		2510		49		0.362	2236	3.34947		0.401	97	1.98677
Tb927.11.13270	0.343		1483		395		0.409	2236	3.34947		0.367	97	1.98677
Tb927.11.1670	0.359		1549		70		0.365	2235	3.34928		0.357	97	1.98677
Tb927.11.9570	0.322		2492		26		0.345	2233	3.34889		0.395	97	1.98677
Tb927.3.5140	0.346		176		16		0.364	2231	3.3485		0.414	97	1.98677
Tb927.8.2550	0.404		2040		64		0.367	2230	3.3483		0.391	96	1.98227
Tb927.11.1050	0.395		788		34		0.347	2228	3.34792		0.378	96	1.98227
Tb927.11.5180	0.353		2106		140		0.391	2227	3.34772		0.324	96	1.98227
Tb927.5.3190	0.369		381		31		0.347	2226	3.34753		0.328	96	1.98227
Tb927.11.1650	0.328		523		18		0.364	2223	3.34694		0.366	96	1.98227
Tb927.10.7440	0.391		2584		40		0.38	2215	3.34537		0.395	96	1.98227
Tb927.11.15500	0.399		1768		39		0.351	2213	3.34498		0.381	96	1.98227
Tb927.3.4820	0.36		1071		141		0.377	2209	3.3442		0.329	96	1.98227
Tb927.10.7870	0.4		1373		131		0.318	2208	3.344		0.387	96	1.98227
Tb927.10.8940	0.415		35541		2679		0.434	2208	3.344		0.353	96	1.98227
Tb927.11.12190	0.34		1558		28		0.41	2207	3.3438		0.372	96	1.98227
Tb927.11.16840	0.345		1414		39		0.359	2207	3.3438		0.312	96	1.98227
Tb927.5.1030	0.335		779		41		0.359	2205	3.34341		0.35	95	1.97772
Tb927.9.15380	0.39		2550		71		0.351	2204	3.34321		0.374	95	1.97772
Tb927.10.4690	0.458		621		280		0.375	2202	3.34282		0.381	95	1.97772
Tb927.4.1250	0.355		1265		21		0.388	2202	3.34282		0.379	95	1.97772
Tb927.6.2050	0.451		1348		67		0.394	2202	3.34282		0.383	95	1.97772
Tb927.10.5920	0.353		1939		24		0.417	2201	3.34262		0.351	95	1.97772
Tb927.11.810	0.324		1287		41		0.33	2199	3.34223		0.368	95	1.97772
Tb927.7.2410	0.348		1251		28		0.363	2198	3.34203		0.372	95	1.97772
Tb927.10.13870	0.376		1164		27		0.388	2197	3.34183		0.347	95	1.97772
Tb927.8.7040	0.356		2351		152		0.357	2196	3.34163		0.356	94	1.97313
Tb927.10.2120	0.259		250		30		0.351	2194	3.34124		0.392	94	1.97313
Tb927.7.4200	0.332		734		23		0.361	2193	3.34104		0.347	94	1.97313
Tb927.1.840	0.315		676		33		0.352	2191	3.34064		0.391	94	1.97313
Tb927.5.3510	0.376		2395		42		0.347	2190	3.34044		0.323	94	1.97313
Tb927.7.6280	0.355		1399		44		0.372	2185	3.33945		0.363	94	1.97313
Tb927.7.4570	0.389		12491		466		0.365	2179	3.33826		0.374	94	1.97313
Tb927.3.2960	0.411		27000		1202		0.325	2176	3.33766		0.337	94	1.97313
Tb927.6.4530	0.346		631		55		0.35	2175	3.33746		0.384	94	1.97313
Tb927.8.1990	0.412		13623		926		0.401	2173	3.33706		0.329	93	1.96848
Tb927.11.13730	0.35		3597		109		0.35	2171	3.33666		0.359	93	1.96848
Tb927.6.3650	0.388		3089		217		0.362	2166	3.33566		0.365	93	1.96848
Tb927.6.700	0.39		7915		68		0.348	2164	3.33526		0.368	93	1.96848
Tb927.11.2460	0.356		22		4		0.381	2164	3.33526		0.37	93	1.96848
Tb927.11.7520	0.354		1703		48		0.335	2161	3.33465		0.354	93	1.96848
Tb927.9.12040	0.354		548		17		0.35	2161	3.33465		0.36	93	1.96848
Tb927.9.7250	0.353		662		44		0.362	2160	3.33445		0.36	93	1.96848
Tb927.9.9610	0.385		225		39		0.336	2160	3.33445		0.383	93	1.96848
Tb927.6.2840	0.358		1388		29		0.424	2157	3.33385		0.355	93	1.96848
Tb927.9.11700	0.342		796		57		0.376	2157	3.33385		0.359	93	1.96848
Tb927.10.3960	0.395		301		149		0.385	2156	3.33365		0.394	93	1.96848
Tb927.9.9810	0.356		3429		359		0.423	2156	3.33365		0.435	93	1.96848
Tb927.10.11040	0.326		441		2		0.374	2155	3.33345		0.31	92	1.96379
Tb927.10.540	0.396		13712		419		0.366	2155	3.33345		0.381	92	1.96379
Tb927.11.2350	0.395		479		45		0.35	2155	3.33345		0.407	92	1.96379
Tb927.9.1560	0.374		2382		42		0.316	2150	3.33244		0.389	92	1.96379
Tb927.9.4520	0.378		2462		84		0.343	2149	3.33224		0.407	92	1.96379
Tb927.5.1280	0.357		1326		86		0.392	2147	3.33183		0.372	92	1.96379
Tb927.7.3060	0.329		756		14		0.371	2144	3.33122		0.347	92	1.96379
Tb927.8.3240	0.409		2030		102		0.371	2141	3.33062		0.346	91	1.95904
Tb927.9.13490	0.388		3378		76		0.318	2140	3.33041		0.379	91	1.95904
Tb927.4.360	0.396		2372		207		0.4	2137	3.3298		0.289	91	1.95904
Tb927.2.5830	0.322		669		10		0.379	2134	3.32919		0.399	91	1.95904
Tb927.10.6850	0.429		1010		41		0.374	2133	3.32899		0.336	91	1.95904
Tb927.11.180	0.395		1974		86		0.33	2132	3.32879		0.406	91	1.95904
Tb927.10.11520	0.395		1047		112		0.394	2130	3.32838		0.387	91	1.95904
Tb927.11.16070	0.293		678		11		0.353	2127	3.32777		0.363	91	1.95904
Tb927.9.3340	0.421		1158		67		0.376	2126	3.32756		0.397	91	1.95904
Tb927.11.1840	0.411		6555		315		0.377	2125	3.32736		0.398	91	1.95904
Tb927.11.2500	0.425		7843		272		0.349	2125	3.32736		0.338	91	1.95904
Tb927.10.5980	0.326		814		58		0.398	2124	3.32715		0.367	91	1.95904
Tb927.3.1260	0.353		494		58		0.373	2121	3.32654		0.328	90	1.95424
Tb927.8.1000	0.324		303		21		0.413	2120	3.32634		0.405	90	1.95424
Tb927.10.10610	0.361		6021		236		0.358	2117	3.32572		0.4	90	1.95424
Tb927.6.1440	0.351		927		38		0.385	2110	3.32428		0.298	90	1.95424
Tb927.10.8630	0.325		2776		105		0.361	2107	3.32366		0.431	90	1.95424
Tb927.10.2060	0.334		963		12		0.353	2106	3.32346		0.384	90	1.95424
Tb927.2.4240	0.378		2613		22		0.358	2104	3.32305		0.389	90	1.95424
Tb927.3.5350	0.373		1909		314		0.376	2104	3.32305		0.386	90	1.95424
Tb927.6.3900	0.331		530		34		0.404	2104	3.32305		0.402	90	1.95424
Tb927.8.1440	0.385		2319		139		0.365	2100	3.32222		0.405	90	1.95424
Tb927.11.2100	0.322		1051		14		0.345	2098	3.32181		0.331	90	1.95424
Tb927.10.3430	0.337		719		16		0.342	2093	3.32077		0.39	90	1.95424
Tb927.10.3540	0.377		1918		129		0.335	2092	3.32056		0.33	90	1.95424
Tb927.11.9850	0.351		271		24		0.368	2092	3.32056		0.364	89	1.94939
Tb927.4.2280	0.353		1083		71		0.369	2092	3.32056		0.419	89	1.94939
Tb927.11.6720	0.328		3322		39		0.349	2091	3.32035		0.425	89	1.94939
Tb927.11.9440	0.362		1950		113		0.362	2091	3.32035		0.354	89	1.94939
Tb927.8.5780	0.376		1848		125		0.351	2091	3.32035		0.358	89	1.94939
Tb927.5.920	0.364		1082		30		0.37	2090	3.32015		0.463	89	1.94939
Tb927.10.2860	0.329		1508		30		0.333	2085	3.31911		0.343	89	1.94939
Tb927.10.3770	0.379		1311		21		0.337	2082	3.31848		0.388	89	1.94939
Tb927.11.13870	0.359		1308		70		0.369	2081	3.31827		0.4	89	1.94939
Tb927.8.1010	0.338		405		25		0.391	2080	3.31806		0.369	89	1.94939
Tb927.1.4230	0.396		1342		81		0.329	2076	3.31723		0.342	89	1.94939
Tb927.11.650	0.355		746		63		0.388	2075	3.31702		0.413	89	1.94939
Tb927.11.6640	0.367		726		97		0.34	2075	3.31702		0.369	89	1.94939
Tb927.9.14120	0.365		1128		44		0.319	2074	3.31681		0.34	89	1.94939
Tb927.11.15030	0.405		895		203		0.381	2068	3.31555		0.388	88	1.94448
Tb927.2.2460	0.369		1023		61		0.387	2064	3.31471		0.341	88	1.94448
Tb927.5.2700	0.381		1829		56		0.385	2059	3.31366		0.356	88	1.94448
Tb927.8.6300	0.339		826		20		0.378	2058	3.31345		0.372	88	1.94448
Tb927.11.13250	0.436		7435		141		0.358	2053	3.31239		0.358	88	1.94448
Tb927.11.190	0.382		2614		36		0.366	2048	3.31133		0.419	88	1.94448
Tb927.6.5090	0.358		1741		20		0.364	2048	3.31133		0.335	88	1.94448
Tb927.9.13570	0.332		580		2		0.381	2045	3.31069		0.384	88	1.94448
Tb927.2.3800	0.369		6379		163		0.343	2042	3.31006		0.392	88	1.94448
Tb927.10.240	0.353		2950		66		0.404	2040	3.30963		0.406	88	1.94448
Tb927.11.3400	0.343		1004		52		0.341	2039	3.30942		0.368	88	1.94448
Tb927.3.5600	0.348		1122		43		0.407	2037	3.30899		0.366	88	1.94448
Tb927.5.1520	0.424		4610		138		0.353	2033	3.30814		0.387	87	1.93952
Tb927.8.3280	0.349		879		17		0.337	2032	3.30792		0.317	87	1.93952
Tb927.9.8520	0.42		911		52		0.409	2030	3.3075		0.349	87	1.93952
Tb927.10.11300	0.399		8749		2533		0.364	2023	3.306		0.358	87	1.93952
Tb927.11.1220	0.351		474		8		0.371	2023	3.306		0.371	87	1.93952
Tb927.11.16620	0.297		586		8		0.32	2021	3.30557		0.365	87	1.93952
Tb927.6.4210	0.344		2752		74		0.405	2019	3.30514		0.377	87	1.93952
Tb927.6.4970	0.387		2252		53		0.342	2018	3.30492		0.356	87	1.93952
Tb927.8.3320	0.38		741		17		0.402	2016	3.30449		0.385	87	1.93952
Tb927.8.4290	0.439		558		41		0.346	2013	3.30384		0.362	87	1.93952
Tb927.9.14230	0.314		572		68		0.342	2012	3.30363		0.344	87	1.93952
Tb927.11.15100	0.396		7283		226		0.408	2008	3.30276		0.332	87	1.93952
Tb927.11.5860	0.346		333		41		0.405	2008	3.30276		0.301	87	1.93952
Tb927.7.4510	0.404		1275		67		0.323	2008	3.30276		0.375	86	1.9345
Tb927.4.3410	0.337		987		14		0.387	2008	3.30276		0.385	86	1.9345
Tb927.10.5800	0.316		368		10		0.357	2004	3.3019		0.357	86	1.9345
Tb927.11.1010	0.374		1191		45		0.355	2002	3.30146		0.395	86	1.9345
Tb927.11.6020	0.323		278		21		0.359	1998	3.3006		0.337	86	1.9345
Tb927.6.4800	0.329		2076		93		0.354	1996	3.30016		0.385	86	1.9345
Tb927.9.12110	0.419		6093		151		0.377	1996	3.30016		0.414	86	1.9345
Tb927.9.12480	0.385		1024		78		0.335	1996	3.30016		0.373	86	1.9345
Tb927.9.11360	0.299		241		10		0.373	1995	3.29994		0.354	86	1.9345
Tb927.10.15320	0.306		1207		192		0.306	1991	3.29907		0.364	86	1.9345
Tb927.10.6030	0.41		4504		239		0.37	1991	3.29907		0.348	86	1.9345
Tb927.4.680	0.292		173		12		0.378	1987	3.2982		0.342	85	1.92942
Tb927.3.1120	0.429		15920		1039		0.368	1983	3.29732		0.348	85	1.92942
Tb927.5.4350	0.361		289		70		0.354	1982	3.2971		0.372	85	1.92942
Tb927.9.8990	0.428		2382		191		0.37	1977	3.29601		0.338	85	1.92942
Tb927.1.560	0.323		1060		13		0.365	1977	3.29601		0.39	85	1.92942
Tb927.10.11210	0.306		1991		24		0.342	1976	3.29579		0.358	85	1.92942
Tb927.11.11320	0.394		81		8		0.357	1975	3.29557		0.367	85	1.92942
Tb927.3.3650	0.344		552		28		0.357	1974	3.29535		0.415	85	1.92942
Tb927.9.7020	0.386		249		23		0.395	1974	3.29535		0.39	85	1.92942
Tb927.5.580	0.462		1238		217		0.395	1973	3.29513		0.375	85	1.92942
Tb927.9.12670	0.359		490		26		0.365	1971	3.29469		0.395	85	1.92942
Tb927.9.13350	0.373		847		55		0.43	1967	3.2938		0.378	84	1.92428
Tb927.10.4970	0.338		668		42		0.381	1964	3.29314		0.357	84	1.92428
Tb927.11.2880	0.355		1392		26		0.388	1961	3.29248		0.373	84	1.92428
Tb927.8.2570	0.345		2098		49		0.345	1957	3.29159		0.384	84	1.92428
Tb927.11.380	0.331		559		40		0.356	1954	3.29092		0.363	84	1.92428
Tb927.11.5970	0.353		1498		12		0.376	1954	3.29092		0.398	84	1.92428
Tb927.11.6980	0.352		1625		69		0.351	1954	3.29092		0.308	84	1.92428
Tb927.11.7840	0.375		5852		103		0.35	1954	3.29092		0.373	84	1.92428
Tb927.3.3510	0.362		896		9		0.359	1950	3.29003		0.357	83	1.91908
Tb927.4.2560	0.378		466		21		0.362	1950	3.29003		0.369	83	1.91908
Tb927.6.1500	0.41		6936		109		0.365	1949	3.28981		0.319	83	1.91908
Tb927.7.4210	0.336		607		23		0.389	1944	3.2887		0.413	83	1.91908
Tb927.11.16080	0.407		1680		107		0.379	1943	3.28847		0.363	83	1.91908
Tb927.7.2070	0.344		3163		109		0.353	1939	3.28758		0.362	83	1.91908
Tb927.9.2580	0.357		1379		61		0.358	1936	3.28691		0.403	83	1.91908
Tb927.5.1700	0.379		2486		141		0.374	1934	3.28646		0.354	83	1.91908
Tb927.1.4010	0.35		719		8		0.369	1933	3.28623		0.352	83	1.91908
Tb927.11.1070	0.337		2481		86		0.308	1933	3.28623		0.41	83	1.91908
Tb927.11.12740	0.32		1057		18		0.357	1931	3.28578		0.426	83	1.91908
Tb927.3.770	0.405		1683		50		0.357	1931	3.28578		0.383	83	1.91908
Tb927.8.5180	0.354		810		39		0.365	1930	3.28556		0.387	83	1.91908
Tb927.9.8190	0.391		2792		174		0.344	1929	3.28533		0.364	83	1.91908
Tb927.10.3250	0.351		845		26		0.349	1928	3.28511		0.352	83	1.91908
Tb927.6.4520	0.4		1875		90		0.372	1927	3.28488		0.394	83	1.91908
Tb927.9.8780	0.348		547		30		0.344	1926	3.28466		0.36	82	1.91381
Tb927.10.12400	0.323		987		42		0.344	1923	3.28398		0.403	82	1.91381
Tb927.10.1940	0.341		481		18		0.37	1923	3.28398		0.391	82	1.91381
Tb927.9.10550	0.353		524		12		0.339	1922	3.28375		0.382	82	1.91381
Tb927.10.10070	0.348		908		12		0.424	1920	3.2833		0.369	82	1.91381
Tb927.10.11290	0.298		134		8		0.407	1919	3.28307		0.349	82	1.91381
Tb927.10.9960	0.306		650		19		0.322	1918	3.28285		0.377	82	1.91381
Tb927.10.2890	0.419		87447		3810		0.377	1918	3.28285		0.385	82	1.91381
Tb927.8.6390	0.4		5175		311		0.355	1918	3.28285		0.393	82	1.91381
Tb927.10.15010	0.363		1256		83		0.371	1916	3.2824		0.365	82	1.91381
Tb927.11.6580	0.309		385		4		0.414	1916	3.2824		0.361	82	1.91381
Tb927.2.4530	0.369		2081		109		0.398	1915	3.28217		0.408	82	1.91381
Tb927.3.1900	0.388		3121		69		0.373	1909	3.28081		0.367	82	1.91381
Tb927.6.4770	0.373		3606		302		0.335	1905	3.27989		0.357	82	1.91381
Tb927.5.1510	0.398		757		35		0.335	1904	3.27967		0.344	82	1.91381
Tb927.8.5890	0.394		975		59		0.431	1904	3.27967		0.318	82	1.91381
Tb927.11.7310	0.352		1375		41		0.344	1903	3.27944		0.312	81	1.90849
Tb927.11.9740	0.333		128		3		0.365	1903	3.27944		0.382	81	1.90849
Tb927.10.11920	0.353		384		31		0.409	1901	3.27898		0.328	81	1.90849
Tb927.11.2980	0.347		458		6		0.365	1900	3.27875		0.396	81	1.90849
Tb927.6.4360	0.337		245		38		0.327	1899	3.27852		0.366	81	1.90849
Tb927.8.2130	0.344		547		24		0.385	1897	3.27807		0.334	81	1.90849
Tb927.10.1410	0.351		413		32		0.42	1896	3.27784		0.364	81	1.90849
Tb927.10.14530	0.384		4576		157		0.37	1894	3.27738		0.411	81	1.90849
Tb927.10.8540	0.384		4214		148		0.355	1885	3.27531		0.417	81	1.90849
Tb927.3.870	0.341		1126		30		0.352	1883	3.27485		0.347	81	1.90849
Tb927.9.12160	0.338		471		9		0.32	1882	3.27462		0.366	81	1.90849
Tb927.10.13670	0.409		2263		77		0.348	1880	3.27416		0.356	80	1.90309
Tb927.11.11570	0.339		1848		28		0.357	1879	3.27393		0.362	80	1.90309
Tb927.5.3200	0.41		500		28		0.347	1876	3.27323		0.363	80	1.90309
Tb927.11.11240	0.33		341		55		0.356	1875	3.273		0.365	80	1.90309
Tb927.8.6440	0.41		2885		171		0.387	1875	3.273		0.381	80	1.90309
Tb927.10.6080	0.371		5836		265		0.4	1875	3.273		0.403	80	1.90309
Tb927.5.3540	0.338		842		7		0.324	1875	3.273		0.419	80	1.90309
Tb927.8.6800	0.295		512		24		0.343	1871	3.27207		0.353	80	1.90309
Tb927.9.1640	0.303		459		63		0.36	1867	3.27114		0.386	80	1.90309
Tb927.9.8210	0.373		820		33		0.32	1866	3.27091		0.362	80	1.90309
Tb927.10.8880	0.335		1008		23		0.353	1865	3.27068		0.393	80	1.90309
Tb927.11.1330	0.35		1685		211		0.372	1865	3.27068		0.355	80	1.90309
Tb927.11.13600	0.382		533		25		0.397	1863	3.27021		0.403	80	1.90309
Tb927.11.8350	0.375		644		38		0.395	1863	3.27021		0.352	80	1.90309
Tb927.3.2050	0.38		1258		18		0.344	1862	3.26998		0.385	80	1.90309
Tb927.7.3920	0.409		1860		122		0.409	1860	3.26951		0.359	80	1.90309
Tb927.11.10560	0.391		6566		118		0.365	1858	3.26905		0.391	79	1.89763
Tb927.2.2940	0.343		1074		21		0.359	1858	3.26905		0.37	79	1.89763
Tb927.2.5930	0.352		1025		20		0.336	1857	3.26881		0.362	79	1.89763
Tb927.3.5280	0.361		1287		53		0.388	1857	3.26881		0.368	79	1.89763
Tb927.8.980	0.367		10580		172		0.373	1857	3.26881		0.368	79	1.89763
Tb927.6.2390	0.368		1846		50		0.353	1856	3.26858		0.332	79	1.89763
Tb927.6.2970	0.338		523		14		0.384	1855	3.26834		0.382	78	1.89209
Tb927.7.4670	0.343		1235		43		0.31	1854	3.26811		0.384	78	1.89209
Tb927.7.6620	0.407		3924		63		0.366	1854	3.26811		0.39	78	1.89209
Tb927.7.740	0.339		917		30		0.353	1852	3.26764		0.385	78	1.89209
Tb927.9.5800	0.298		746		90		0.393	1851	3.26741		0.341	78	1.89209
Tb927.1.1330	0.36		576		21		0.376	1848	3.2667		0.344	78	1.89209
Tb927.11.9220	0.382		7206		123		0.339	1848	3.2667		0.382	78	1.89209
Tb927.3.3990	0.325		434		23		0.352	1847	3.26647		0.399	78	1.89209
Tb927.3.4940	0.362		2236		28		0.358	1847	3.26647		0.346	78	1.89209
Tb927.4.1830	0.393		905		72		0.368	1846	3.26623		0.349	78	1.89209
Tb927.4.840	0.352		629		26		0.392	1842	3.26529		0.39	78	1.89209
Tb927.7.2520	0.344		625		17		0.336	1841	3.26505		0.347	78	1.89209
Tb927.7.3580	0.392		577		34		0.422	1840	3.26482		0.323	78	1.89209
Tb927.10.16100	0.381		7554		123		0.369	1839	3.26458		0.365	78	1.89209
Tb927.3.4520	0.342		456		10		0.38	1838	3.26435		0.353	78	1.89209
Tb927.6.2550	0.388		3836		88		0.346	1838	3.26435		0.337	77	1.88649
Tb927.10.12860	0.383		939		24		0.347	1837	3.26411		0.361	77	1.88649
Tb927.11.15770	0.362		753		20		0.336	1836	3.26387		0.409	77	1.88649
Tb927.11.8070	0.33		604		13		0.359	1835	3.26364		0.358	77	1.88649
Tb927.4.1890	0.354		679		63		0.343	1834	3.2634		0.336	77	1.88649
Tb927.6.3510	0.355		886		20		0.39	1834	3.2634		0.381	77	1.88649
Tb927.11.280	0.34		1408		32		0.342	1833	3.26316		0.376	77	1.88649
Tb927.7.6670	0.34		3240		14		0.373	1833	3.26316		0.37	77	1.88649
Tb927.11.7930	0.363		833		80		0.39	1832	3.26293		0.405	76	1.88081
Tb927.3.3920	0.327		317		15		0.35	1831	3.26269		0.359	76	1.88081
Tb927.4.980	0.322		723		8		0.416	1830	3.26245		0.355	76	1.88081
Tb927.9.11900	0.328		366		10		0.381	1829	3.26221		0.368	76	1.88081
Tb927.1.4140	0.356		460		10		0.416	1826	3.2615		0.388	76	1.88081
Tb927.10.11050	0.303		933		24		0.358	1826	3.2615		0.388	76	1.88081
Tb927.10.14810	0.455		3345		237		0.332	1824	3.26102		0.393	76	1.88081
Tb927.11.6810	0.367		1069		35		0.394	1822	3.26055		0.415	76	1.88081
Tb927.8.1600	0.399		8798		172		0.379	1819	3.25983		0.342	76	1.88081
Tb927.8.1810	0.338		621		17		0.353	1816	3.25912		0.366	76	1.88081
Tb927.3.1280	0.33		2132		60		0.355	1814	3.25864		0.361	76	1.88081
Tb927.6.4930	0.336		1107		69		0.371	1813	3.2584		0.346	76	1.88081
Tb927.8.2440	0.391		380		82		0.323	1811	3.25792		0.422	75	1.87506
Tb927.9.9550	0.422		1323				0.381	1808	3.2572		0.411	75	1.87506
Tb927.10.6520	0.292		623		12		0.371	1807	3.25696		0.379	75	1.87506
Tb927.11.16720	0.358		1203		87		0.402	1804	3.25624		0.386	75	1.87506
Tb927.4.1520	0.37		626		21		0.34	1803	3.256		0.378	75	1.87506
Tb927.9.12360	0.341		2792		78		0.354	1801	3.25551		0.348	75	1.87506
Tb927.9.14300	0.38		355		5		0.361	1798	3.25479		0.354	75	1.87506
Tb927.11.16770	0.351		648		112		0.382	1793	3.25358		0.343	75	1.87506
Tb927.10.14280	0.326		488		27		0.354	1792	3.25334		0.368	75	1.87506
Tb927.6.4120	0.346		537		30		0.378	1787	3.25212		0.345	75	1.87506
Tb927.8.580	0.331		1035		31		0.32	1787	3.25212		0.383	75	1.87506
Tb927.10.13710	0.405		2546		152		0.388	1787	3.25212		0.394	75	1.87506
Tb927.10.3970	0.34		744		26		0.338	1781	3.25066		0.377	75	1.87506
Tb927.7.1110	0.379		8828		635		0.381	1778	3.24993		0.335	75	1.87506
Tb927.2.1810	0.386		4008		37		0.396	1776	3.24944		0.357	75	1.87506
Tb927.10.14640	0.327		277		28		0.369	1776	3.24944		0.366	74	1.86923
Tb927.10.2810	0.375		2202		184		0.354	1776	3.24944		0.387	74	1.86923
Tb927.3.5300	0.356		832		56		0.336	1774	3.24895		0.338	74	1.86923
Tb927.7.5710	0.33		595		25		0.396	1774	3.24895		0.393	74	1.86923
Tb927.7.6200	0.34		806		18		0.35	1773	3.24871		0.344	74	1.86923
Tb927.6.5000	0.346		726		32		0.321	1770	3.24797		0.375	74	1.86923
Tb927.10.8090	0.338		1320		85		0.376	1769	3.24773		0.376	74	1.86923
Tb927.11.1560	0.403		4328		173		0.341	1769	3.24773		0.358	74	1.86923
Tb927.11.5420	0.387		786		45		0.399	1768	3.24748		0.393	74	1.86923
Tb927.8.1950	0.341		3984		88		0.391	1768	3.24748		0.384	74	1.86923
Tb927.1.1120	0.374		974		26		0.362	1765	3.24674		0.381	74	1.86923
Tb927.11.14930	0.359		690		9		0.365	1760	3.24551		0.378	74	1.86923
Tb927.2.4540	0.434		2208		135		0.365	1759	3.24527		0.345	74	1.86923
Tb927.4.850	0.377		434		39		0.368	1759	3.24527		0.404	74	1.86923
Tb927.9.9260	0.414		809		44		0.305	1758	3.24502		0.328	74	1.86923
Tb927.10.11340	0.371		4039		37		0.384	1750	3.24304		0.362	74	1.86923
Tb927.11.10150	0.378		2058		16		0.318	1748	3.24254		0.341	74	1.86923
Tb927.8.3420	0.307		195		9		0.369	1747	3.24229		0.334	73	1.86332
Tb927.8.630	0.35		355		11		0.363	1747	3.24229		0.422	73	1.86332
Tb927.10.13990	0.345		539		21		0.366	1746	3.24204		0.419	73	1.86332
Tb927.10.2190	0.457		3473		505		0.353	1745	3.2418		0.398	73	1.86332
Tb927.10.6380	0.289		1736		91		0.358	1741	3.2408		0.354	73	1.86332
Tb927.11.11200	0.338		1072		32		0.355	1740	3.24055		0.332	73	1.86332
Tb927.11.1750	0.347		990		68		0.369	1740	3.24055		0.342	73	1.86332
Tb927.7.3050	0.374		3441		26		0.289	1736	3.23955		0.364	73	1.86332
Tb927.11.11450	0.335		478		9		0.358	1733	3.2388		0.358	73	1.86332
Tb927.2.5070	0.343		562		22		0.362	1732	3.23855		0.315	73	1.86332
Tb927.4.2020	0.346		707		30		0.339	1728	3.23754		0.33	73	1.86332
Tb927.7.4290	0.444		3951		146		0.315	1727	3.23729		0.367	72	1.85733
Tb927.9.11560	0.382		724		28		0.386	1721	3.23578		0.308	72	1.85733
Tb927.9.9060	0.398		3869		297		0.343	1720	3.23553		0.394	72	1.85733
Tb927.10.12130	0.367		1349		11		0.386	1718	3.23502		0.32	72	1.85733
Tb927.7.3590	0.339		5898		386		0.348	1718	3.23502		0.396	72	1.85733
Tb927.8.3300	0.353		1147		19		0.333	1718	3.23502		0.398	72	1.85733
Tb927.10.3610	0.346		630		17		0.355	1716	3.23452		0.362	72	1.85733
Tb927.10.3700	0.324		1084		55		0.333	1714	3.23401		0.393	72	1.85733
Tb927.11.13570	0.425		1663		89		0.407	1713	3.23376		0.369	72	1.85733
Tb927.2.2180	0.341		1337		41		0.356	1712	3.2335		0.385	72	1.85733
Tb927.6.1600	0.353		1193		99		0.363	1712	3.2335		0.359	72	1.85733
Tb927.3.4870	0.32		179		6		0.338	1710	3.233		0.387	72	1.85733
Tb927.7.6240	0.341		658		13		0.34	1707	3.23223		0.329	72	1.85733
Tb927.10.15510	0.333		270		17		0.385	1707	3.23223		0.347	72	1.85733
Tb927.8.3540	0.346		1282		18		0.367	1706	3.23198		0.367	72	1.85733
Tb927.11.4910	0.397		5803		131		0.356	1706	3.23198		0.331	72	1.85733
Tb927.8.1570	0.362		2091		119		0.382	1704	3.23147		0.391	72	1.85733
Tb927.9.11250	0.364		2023		70		0.354	1703	3.23121		0.402	72	1.85733
Tb927.9.1650	0.319		206		8		0.398	1701	3.2307		0.391	72	1.85733
Tb927.11.8250	0.355		493		45		0.38	1701	3.2307		0.376	72	1.85733
Tb927.3.3910	0.346		982		26		0.385	1701	3.2307		0.373	72	1.85733
Tb927.10.4710	0.394		2826		203		0.436	1699	3.23019		0.375	72	1.85733
Tb927.3.5620	0.369		5084		72		0.339	1696	3.22943		0.369	72	1.85733
Tb927.5.3980	0.389		637		28		0.43	1694	3.22891		0.406	72	1.85733
Tb927.1.4310	0.366		9594		151		0.377	1693	3.22866		0.318	72	1.85733
Tb927.10.9590	0.298		499		17		0.363	1688	3.22737		0.35	72	1.85733
Tb927.5.2110	0.383		616		58		0.353	1688	3.22737		0.377	72	1.85733
Tb927.3.4240	0.309		214		27		0.34	1685	3.2266		0.366	72	1.85733
Tb927.5.4160	0.276		179		13		0.35	1685	3.2266		0.303	72	1.85733
Tb927.6.1870	0.355		3326		56		0.357	1685	3.2266		0.359	71	1.85126
Tb927.8.5800	0.387		381		39		0.348	1684	3.22634		0.39	71	1.85126
Tb927.9.11120	0.392		2147		43		0.405	1683	3.22608		0.353	71	1.85126
Tb927.9.12470	0.351		898		38		0.344	1683	3.22608		0.379	71	1.85126
Tb927.11.14270	0.338		753		15		0.383	1683	3.22608		0.39	71	1.85126
Tb927.4.320	0.345		1130		30		0.365	1683	3.22608		0.373	71	1.85126
Tb927.11.580	0.347		553		35		0.407	1680	3.22531		0.37	71	1.85126
Tb927.5.3360	0.364		1071		41		0.347	1679	3.22505		0.335	71	1.85126
Tb927.7.6290	0.365		2100		65		0.386	1678	3.22479		0.348	71	1.85126
Tb927.11.12230	0.387		1562		67		0.343	1678	3.22479		0.413	71	1.85126
Tb927.5.3230	0.333		3266		23		0.433	1676	3.22427		0.442	71	1.85126
Tb927.7.760	0.37		1923		68		0.373	1676	3.22427		0.34	71	1.85126
Tb927.10.6680	0.378		2239		27		0.342	1673	3.2235		0.348	71	1.85126
Tb927.10.7630	0.326		1613		30		0.411	1671	3.22298		0.365	71	1.85126
Tb927.5.3950	0.386		704		28		0.442	1670	3.22272		0.375	71	1.85126
Tb927.7.6250	0.339		166		4		0.399	1670	3.22272		0.373	71	1.85126
Tb927.1.2150	0.416		1		2		0.399	1669	3.22246		0.373	71	1.85126
Tb927.10.7320	0.32		417		31		0.403	1667	3.22194		0.327	70	1.8451
Tb927.5.4290	0.329		603		20		0.312	1666	3.22167		0.368	70	1.8451
Tb927.9.2110	0.426		320		23		0.337	1664	3.22115		0.359	70	1.8451
Tb927.10.7730	0.355		657		23		0.413	1663	3.22089		0.359	70	1.8451
Tb927.10.8680	0.32		206		11		0.425	1663	3.22089		0.361	70	1.8451
Tb927.11.16450	0.369		956		67		0.351	1656	3.21906		0.364	70	1.8451
Tb927.5.1780	0.302		2554		115		0.35	1656	3.21906		0.38	70	1.8451
Tb927.9.2030	0.367		748		12		0.345	1655	3.2188		0.378	70	1.8451
Tb927.4.3540	0.366		962		28		0.368	1652	3.21801		0.384	70	1.8451
Tb927.10.14000	0.396		19586		39		0.326	1650	3.21748		0.431	70	1.8451
Tb927.6.1190	0.359		728		43		0.352	1649	3.21722		0.34	70	1.8451
Tb927.11.1190	0.344		468		17		0.362	1648	3.21696		0.326	70	1.8451
Tb927.7.860	0.336		433		3		0.34	1645	3.21617		0.365	70	1.8451
Tb927.9.11510	0.348		502		15		0.365	1644	3.2159		0.355	70	1.8451
Tb927.10.13970	0.378		948		27		0.381	1643	3.21564		0.357	70	1.8451
Tb927.11.14710	0.39		404		23		0.385	1642	3.21537		0.353	69	1.83885
Tb927.3.4590	0.379		345		71		0.41	1641	3.21511		0.352	69	1.83885
Tb927.7.4460	0.347		3526		94		0.379	1641	3.21511		0.388	69	1.83885
Tb927.8.5540	0.368		976		43		0.367	1641	3.21511		0.336	69	1.83885
Tb927.10.2900	0.357		4034		62		0.403	1640	3.21484		0.368	69	1.83885
Tb927.11.10940	0.39		973		188		0.374	1639	3.21458		0.354	69	1.83885
Tb927.11.16500	0.355		250		5		0.363	1638	3.21431		0.404	69	1.83885
Tb927.9.6060	0.371		2141		45		0.382	1637	3.21405		0.363	69	1.83885
Tb927.10.13140	0.379		619		66		0.388	1637	3.21405		0.361	69	1.83885
Tb927.11.16270	0.358		222		5		0.333	1633	3.21299		0.35	69	1.83885
Tb927.6.4160	0.318		563		16		0.422	1631	3.21245		0.341	69	1.83885
Tb927.3.3570	0.321		625		34		0.327	1630	3.21219		0.331	69	1.83885
Tb927.6.2540	0.349		993		38		0.355	1627	3.21139		0.381	69	1.83885
Tb927.7.4870	0.377		1175		105		0.367	1626	3.21112		0.378	69	1.83885
Tb927.9.8650	0.438		601		102		0.352	1625	3.21085		0.371	69	1.83885
Tb927.11.3330	0.319		479		8		0.417	1625	3.21085		0.359	69	1.83885
Tb927.11.9460	0.365		374		15		0.33	1625	3.21085		0.339	69	1.83885
Tb927.10.14650	0.37		317		79		0.344	1624	3.21059		0.381	69	1.83885
Tb927.10.1540	0.344		1862		78		0.384	1622	3.21005		0.397	68	1.83251
Tb927.10.11890	0.388		2075		49		0.371	1622	3.21005		0.387	68	1.83251
Tb927.10.1930	0.345		651		14		0.337	1620	3.20952		0.39	68	1.83251
Tb927.10.14570	0.361		1184		48		0.358	1619	3.20925		0.314	68	1.83251
Tb927.10.340	0.367		408		10		0.375	1619	3.20925		0.347	68	1.83251
Tb927.8.3570	0.354		377		89		0.362	1619	3.20925		0.37	68	1.83251
Tb927.10.11180	0.326		1232		32		0.376	1619	3.20925		0.362	68	1.83251
Tb927.10.12710	0.415		24199		361		0.372	1618	3.20898		0.337	68	1.83251
Tb927.10.8650	0.388		1857		76		0.348	1618	3.20898		0.339	68	1.83251
Tb927.6.3110	0.335		838		19		0.338	1615	3.20817		0.386	68	1.83251
Tb927.7.2500	0.417		2866		117		0.402	1615	3.20817		0.357	68	1.83251
Tb927.11.790	0.321		703		39		0.351	1614	3.2079		0.369	68	1.83251
Tb927.6.2080	0.361		1107		27		0.376	1614	3.2079		0.351	68	1.83251
Tb927.7.5460	0.39		710		71		0.343	1614	3.2079		0.383	68	1.83251
Tb927.3.4040	0.359		3319		93		0.326	1613	3.20763		0.392	68	1.83251
Tb927.5.3640	0.326		782		44		0.39	1612	3.20737		0.357	68	1.83251
Tb927.5.810	0.363		1110		146		0.382	1610	3.20683		0.352	68	1.83251
Tb927.9.3120	0.353		2127		33		0.35	1609	3.20656		0.37	68	1.83251
Tb927.10.15300	0.34		826		32		0.378	1607	3.20602		0.365	68	1.83251
Tb927.10.2260	0.352		1847		33		0.366	1607	3.20602		0.355	68	1.83251
Tb927.2.3720	0.355		1740		140		0.335	1607	3.20602		0.434	68	1.83251
Tb927.3.3440	0.336		951		28		0.388	1607	3.20602		0.398	68	1.83251
Tb927.4.3810	0.383		3664		49		0.336	1606	3.20575		0.358	68	1.83251
Tb927.1.2700	0.319		380		7		0.366	1605	3.20548		0.43	68	1.83251
Tb927.10.6180	0.357		2004		30		0.343	1605	3.20548		0.394	68	1.83251
Tb927.10.7830	0.366		489		36		0.314	1604	3.2052		0.391	68	1.83251
Tb927.11.11100	0.352		367		26		0.327	1603	3.20493		0.378	68	1.83251
Tb927.9.9870	0.368		1419		69		0.386	1602	3.20466		0.373	68	1.83251
Tb927.10.10030	0.38		1125		115		0.334	1601	3.20439		0.378	67	1.82607
Tb927.11.13080	0.32		1866		44		0.371	1601	3.20439		0.429	67	1.82607
Tb927.8.6770	0.375		2416		34		0.385	1600	3.20412		0.378	67	1.82607
Tb927.10.2490	0.398		1915		73		0.358	1599	3.20385		0.451	67	1.82607
Tb927.9.8490	0.324		327		20		0.328	1598	3.20358		0.421	67	1.82607
Tb927.6.4660	0.329		272		8		0.354	1598	3.20358		0.404	67	1.82607
Tb927.7.1380	0.328		1043		59		0.334	1597	3.2033		0.387	67	1.82607
Tb927.9.6960	0.322		374		1		0.352	1595	3.20276		0.369	67	1.82607
Tb927.7.6350	0.402		2827		63		0.383	1594	3.20249		0.352	67	1.82607
Tb927.4.4200	0.345		242		22		0.373	1594	3.20249		0.374	67	1.82607
Tb927.8.4580	0.444		2970		151		0.346	1591	3.20167		0.371	67	1.82607
Tb927.9.15080	0.318		1059		57		0.419	1590	3.2014		0.465	67	1.82607
Tb927.11.7350	0.428		1109		676		0.345	1589	3.20112		0.351	67	1.82607
Tb927.7.3810	0.357		1975		107		0.355	1589	3.20112		0.332	67	1.82607
Tb927.10.3130	0.338		1494		28		0.369	1585	3.20003		0.35	67	1.82607
Tb927.10.4700	0.316		509		37		0.375	1585	3.20003		0.382	67	1.82607
Tb927.6.4070	0.354		2564		121		0.426	1584	3.19976		0.379	67	1.82607
Tb927.7.1590	0.347		730		26		0.379	1583	3.19948		0.37	67	1.82607
Tb927.10.11150	0.361		1486		60		0.365	1581	3.19893		0.333	67	1.82607
Tb927.10.1340	0.311		655		10		0.366	1577	3.19783		0.361	67	1.82607
Tb927.10.16110	0.36		1867		40		0.352	1576	3.19756		0.412	66	1.81954
Tb927.10.7890	0.341		2289		45		0.343	1574	3.197		0.331	66	1.81954
Tb927.2.2270	0.34		715		36		0.405	1573	3.19673		0.385	66	1.81954
Tb927.9.6890	0.314		426		0		0.338	1571	3.19618		0.365	66	1.81954
Tb927.10.4070	0.368		585		28		0.396	1569	3.19562		0.321	66	1.81954
Tb927.11.16530	0.328		613		6		0.358	1569	3.19562		0.353	66	1.81954
Tb927.11.7040	0.365		482		93		0.391	1566	3.19479		0.379	66	1.81954
Tb927.4.1820	0.366		316		6		0.369	1566	3.19479		0.402	66	1.81954
Tb927.9.11280	0.379				61		0.343	1565	3.19451		0.316	66	1.81954
Tb927.10.13950	0.389		1557		101		0.376	1565	3.19451		0.349	66	1.81954
Tb927.5.1100	0.425		7789		167		0.394	1565	3.19451		0.368	66	1.81954
Tb927.7.800	0.354		1442		21		0.387	1562	3.19368		0.371	66	1.81954
Tb927.9.9690	0.368		1074		62		0.408	1561	3.1934		0.319	66	1.81954
Tb927.1.1600	0.348		256		2		0.387	1559	3.19285		0.323	66	1.81954
Tb927.10.6880	0.428		9634		577		0.34	1558	3.19257		0.347	66	1.81954
Tb927.11.14030	0.319		797		37		0.365	1558	3.19257		0.326	66	1.81954
Tb927.8.1500	0.385		2787		86		0.417	1558	3.19257		0.388	66	1.81954
Tb927.8.2890	0.309		531		23		0.343	1558	3.19257		0.364	66	1.81954
Tb927.10.1530	0.336		411		8		0.389	1557	3.19229		0.348	66	1.81954
Tb927.11.3650	0.426		8845		640		0.415	1557	3.19229		0.367	66	1.81954
Tb927.8.4170	0.372		988		19		0.364	1557	3.19229		0.36	66	1.81954
Tb927.9.12070	0.365		3490		80		0.343	1557	3.19229		0.376	66	1.81954
Tb927.11.8890	0.368		747		93		0.371	1557	3.19229		0.379	66	1.81954
Tb927.3.3970	0.343		1054		59		0.368	1557	3.19229		0.394	66	1.81954
Tb927.10.15290	0.336		1841		29		0.407	1556	3.19201		0.395	66	1.81954
Tb927.11.2520	0.396		1776		46		0.346	1556	3.19201		0.403	66	1.81954
Tb927.3.2890	0.415		1557		125		0.368	1553	3.19117		0.338	66	1.81954
Tb927.3.3170	0.36		1305		57		0.369	1552	3.19089		0.378	66	1.81954
Tb927.3.3810	0.305		405		12		0.34	1550	3.19033		0.403	66	1.81954
Tb927.5.750	0.33		399		28		0.359	1549	3.19005		0.343	66	1.81954
Tb927.10.8640	0.319		1017		41		0.347	1547	3.18949		0.38	66	1.81954
Tb927.10.9190	0.402		9359		147		0.357	1545	3.18893		0.342	66	1.81954
Tb927.11.16420	0.34		777		7		0.365	1545	3.18893		0.411	65	1.81291
Tb927.8.710	0.368		2446		42		0.378	1542	3.18808		0.362	65	1.81291
Tb927.1.790	0.31		704		9		0.342	1541	3.1878		0.354	65	1.81291
Tb927.2.4930	0.339		5015		112		0.345	1540	3.18752		0.373	65	1.81291
Tb927.1.540	0.378		1542		26		0.337	1537	3.18667		0.365	65	1.81291
Tb927.11.4210	0.392		3376		134		0.358	1535	3.18611		0.408	65	1.81291
Tb927.10.2630	0.368		470		43		0.405	1532	3.18526		0.314	65	1.81291
Tb927.11.400	0.324		449		14		0.331	1528	3.18412		0.315	65	1.81291
Tb927.11.9560	0.288		852		18		0.343	1527	3.18384		0.357	65	1.81291
Tb927.9.1750	0.357		5355		64		0.442	1526	3.18355		0.323	65	1.81291
Tb927.10.4660	0.332		524		37		0.339	1524	3.18298		0.362	65	1.81291
Tb927.3.1020	0.353		601		38		0.39	1523	3.1827		0.418	65	1.81291
Tb927.3.1130	0.337		631		17		0.333	1523	3.1827		0.363	65	1.81291
Tb927.4.1030	0.312		290		10		0.341	1521	3.18213		0.359	65	1.81291
Tb927.9.1770	0.337		4277		31		0.348	1520	3.18184		0.369	65	1.81291
Tb927.10.13960	0.366		1854		81		0.322	1520	3.18184		0.354	65	1.81291
Tb927.9.10230	0.495		11938		999		0.397	1519	3.18156		0.33	65	1.81291
Tb927.10.15520	0.38		3271		70		0.381	1519	3.18156		0.393	65	1.81291
Tb927.11.5020	0.323		1811		18		0.332	1518	3.18127		0.35	65	1.81291
Tb927.11.540	0.34		2075		62		0.386	1518	3.18127		0.347	65	1.81291
Tb927.11.7230	0.308		84		10		0.391	1518	3.18127		0.372	64	1.80618
Tb927.7.1490	0.333		894		16		0.384	1518	3.18127		0.387	64	1.80618
Tb927.1.1540	0.344		1516		27		0.343	1518	3.18127		0.341	64	1.80618
Tb927.11.12530	0.396		5658		142		0.357	1517	3.18099		0.374	64	1.80618
Tb927.11.13360	0.361		2789		37		0.388	1517	3.18099		0.404	64	1.80618
Tb927.1.2730	0.335		733		26		0.371	1516	3.1807		0.357	64	1.80618
Tb927.11.1630	0.349		1086		22		0.344	1516	3.1807		0.344	64	1.80618
Tb927.4.4210	0.38		1838		35		0.321	1516	3.1807		0.367	64	1.80618
Tb927.5.1660	0.385		4123		150		0.361	1515	3.18041		0.358	64	1.80618
Tb927.9.5210	0.415		5257		133		0.388	1515	3.18041		0.427	64	1.80618
Tb927.11.2000	0.356		1197		12		0.392	1513	3.17984		0.359	64	1.80618
Tb927.11.8080	0.36		415		35		0.346	1513	3.17984		0.342	64	1.80618
Tb927.3.3200	0.405		2008		136		0.373	1513	3.17984		0.385	64	1.80618
Tb927.10.1280	0.39		1103		46		0.322	1513	3.17984		0.338	64	1.80618
Tb927.10.2730	0.376		4773		388		0.336	1510	3.17898		0.363	64	1.80618
Tb927.11.14190	0.378		6574		131		0.375	1510	3.17898		0.332	64	1.80618
Tb927.11.3580	0.328		1598		21		0.332	1510	3.17898		0.419	64	1.80618
Tb927.5.2720	0.402		2016		66		0.329	1508	3.1784		0.367	64	1.80618
Tb927.10.10130	0.386		1518		34		0.381	1508	3.1784		0.37	64	1.80618
Tb927.11.1410	0.363		814		20		0.367	1506	3.17782		0.4	64	1.80618
Tb927.6.2060	0.362		3449		79		0.415	1506	3.17782		0.352	64	1.80618
Tb927.7.4020	0.342		2291		51		0.364	1505	3.17754		0.335	64	1.80618
Tb927.9.12440	0.321		380		18		0.337	1502	3.17667		0.357	64	1.80618
Tb927.9.1570	0.33		178		19		0.382	1502	3.17667		0.352	64	1.80618
Tb927.10.7670	0.387		599		60		0.353	1502	3.17667		0.402	64	1.80618
Tb927.11.5030	0.351		1142		43		0.333	1499	3.1758		0.442	64	1.80618
Tb927.4.2060	0.388		4374		151		0.405	1499	3.1758		0.368	63	1.79934
Tb927.5.450	0.384		1855		41		0.363	1499	3.1758		0.363	63	1.79934
Tb927.10.2830	0.346		98		6		0.353	1498	3.17551		0.344	63	1.79934
Tb927.11.12610	0.354		1391		69		0.34	1498	3.17551		0.345	63	1.79934
Tb927.11.4420	0.356		2452		88		0.383	1497	3.17522		0.322	63	1.79934
Tb927.7.3430	0.345		956		46		0.347	1497	3.17522		0.355	63	1.79934
Tb927.8.810	0.382		1793		125		0.344	1496	3.17493		0.303	63	1.79934
Tb927.9.10920	0.338		1571		24		0.374	1495	3.17464		0.407	63	1.79934
Tb927.3.2220	0.385		1350		72		0.348	1495	3.17464		0.354	63	1.79934
Tb927.7.5260	0.386		1721		50		0.338	1494	3.17435		0.402	63	1.79934
Tb927.10.11660	0.383		656		35		0.389	1492	3.17377		0.38	63	1.79934
Tb927.11.15680	0.386		2485		159		0.385	1492	3.17377		0.384	63	1.79934
Tb927.5.2840	0.352		264		16		0.367	1492	3.17377		0.365	63	1.79934
Tb927.7.3330	0.377		7206		22		0.458	1492	3.17377		0.356	63	1.79934
Tb927.10.9350	0.32		718		18		0.364	1491	3.17348		0.344	63	1.79934
Tb927.10.3710	0.399		6706		327		0.364	1491	3.17348		0.341	63	1.79934
Tb927.6.1710	0.316		263		29		0.326	1491	3.17348		0.386	63	1.79934
Tb927.10.11870	0.351		1437		49		0.351	1491	3.17348		0.376	63	1.79934
Tb927.11.14810	0.317		273		34		0.346	1491	3.17348		0.349	63	1.79934
Tb927.4.2550	0.384		497		22		0.36	1490	3.17319		0.376	63	1.79934
Tb927.8.2020	0.39		1154		19		0.361	1489	3.17289		0.338	63	1.79934
Tb927.10.1510	0.382		13362		145		0.342	1486	3.17202		0.353	63	1.79934
Tb927.10.15710	0.383		1156		27		0.361	1486	3.17202		0.369	63	1.79934
Tb927.10.2660	0.375		503		36		0.351	1486	3.17202		0.339	63	1.79934
Tb927.10.5590	0.333		618		13		0.356	1484	3.17143		0.376	63	1.79934
Tb927.11.9760	0.313		1339		35		0.374	1484	3.17143		0.349	63	1.79934
Tb927.10.13660	0.355		935		16		0.33	1484	3.17143		0.341	62	1.79239
Tb927.11.13660	0.388		1065		55		0.382	1484	3.17143		0.345	62	1.79239
Tb927.11.7680	0.345				9		0.343	1483	3.17114		0.357	62	1.79239
Tb927.4.3790	0.387		2467		114		0.38	1483	3.17114		0.368	62	1.79239
Tb927.8.4230	0.365		1187		11		0.344	1483	3.17114		0.34	62	1.79239
Tb927.10.13300	0.366		878		35		0.367	1482	3.17085		0.408	62	1.79239
Tb927.10.13370	0.391		1518		110		0.381	1481	3.17056		0.396	62	1.79239
Tb927.11.16860	0.314		1254		17		0.342	1480	3.17026		0.339	62	1.79239
Tb927.6.1260	0.373		4779		293		0.347	1479	3.16997		0.354	62	1.79239
Tb927.11.11700	0.347		1471		44		0.357	1479	3.16997		0.384	62	1.79239
Tb927.11.450	0.348		643		44		0.348	1478	3.16967		0.364	62	1.79239
Tb927.4.2130	0.331		529		22		0.441	1478	3.16967		0.349	62	1.79239
Tb927.4.2270	0.393		262		8		0.354	1478	3.16967		0.376	62	1.79239
Tb927.9.13530	0.321		445		35		0.357	1477	3.16938		0.375	62	1.79239
Tb927.9.3350	0.339		921		30		0.35	1476	3.16909		0.353	62	1.79239
Tb927.10.11810	0.329		742		16		0.371	1476	3.16909		0.374	62	1.79239
Tb927.11.11390	0.355		210		16		0.366	1474	3.1685		0.347	62	1.79239
Tb927.4.370	0.315		146		4		0.36	1473	3.1682		0.368	62	1.79239
Tb927.8.5770	0.36		965		17		0.365	1473	3.1682		0.347	62	1.79239
Tb927.9.4570	0.296		126		10		0.381	1472	3.16791		0.401	61	1.78533
Tb927.11.2770	0.398		1437		172		0.374	1472	3.16791		0.369	61	1.78533
Tb927.4.2240	0.357		5100		84		0.347	1471	3.16761		0.357	61	1.78533
Tb927.7.4320	0.359		544		13		0.354	1471	3.16761		0.379	61	1.78533
Tb927.8.4930	0.352		1595		52		0.375	1471	3.16761		0.353	61	1.78533
Tb927.8.5740	0.372		563		26		0.356	1469	3.16702		0.375	61	1.78533
Tb927.9.1420	0.325		641		28		0.349	1467	3.16643		0.397	61	1.78533
Tb927.9.1660	0.348		384		20		0.405	1466	3.16613		0.354	61	1.78533
Tb927.1.3010	0.338		1028		24		0.35	1465	3.16584		0.334	61	1.78533
Tb927.11.16150	0.399		653		91		0.338	1463	3.16524		0.357	61	1.78533
Tb927.11.2680	0.309		209		4		0.36	1461	3.16465		0.349	61	1.78533
Tb927.11.4630	0.362		677		14		0.393	1461	3.16465		0.435	61	1.78533
Tb927.5.1500	0.359		294		10		0.344	1461	3.16465		0.341	61	1.78533
Tb927.10.3150	0.362		1392		83		0.351	1459	3.16406		0.323	60	1.77815
Tb927.11.12270	0.32		473		11		0.405	1459	3.16406		0.379	60	1.77815
Tb927.6.1930	0.353		1045		47		0.338	1458	3.16376		0.33	60	1.77815
Tb927.7.530	0.35		1773		20		0.342	1456	3.16316		0.361	60	1.77815
Tb927.10.10990	0.357		1517		36		0.354	1454	3.16256		0.387	60	1.77815
Tb927.11.15170	0.328		734		25		0.375	1454	3.16256		0.368	60	1.77815
Tb927.5.2580	0.375		607		13		0.335	1454	3.16256		0.346	60	1.77815
Tb927.5.3240	0.358		856		34		0.365	1452	3.16197		0.367	60	1.77815
Tb927.8.2300	0.368		1411		60		0.383	1451	3.16167		0.34	60	1.77815
Tb927.2.4110	0.378		2245		70		0.322	1451	3.16167		0.348	60	1.77815
Tb927.10.7000	0.364		214		8		0.336	1451	3.16167		0.362	60	1.77815
Tb927.11.14170	0.329		2926		28		0.344	1449	3.16107		0.348	60	1.77815
Tb927.3.1000	0.363		784		37		0.377	1449	3.16107		0.334	60	1.77815
Tb927.9.11040	0.312		378		4		0.359	1449	3.16107		0.302	60	1.77815
Tb927.1.670	0.367		1008		34		0.316	1447	3.16047		0.299	60	1.77815
Tb927.2.4390	0.359		2500		32		0.309	1447	3.16047		0.401	60	1.77815
Tb927.3.4920	0.382		1610		78		0.343	1445	3.15987		0.385	60	1.77815
Tb927.8.2230	0.329		459		27		0.354	1442	3.15897		0.315	60	1.77815
Tb927.1.3940	0.348		224		4		0.357	1442	3.15897		0.368	60	1.77815
Tb927.11.12910	0.32		271		23		0.334	1442	3.15897		0.367	60	1.77815
Tb927.11.15150	0.363		2782		144		0.413	1442	3.15897		0.336	59	1.77085
Tb927.11.470	0.34		377		23		0.407	1441	3.15866		0.368	59	1.77085
Tb927.9.5630	0.359		428		19		0.385	1441	3.15866		0.394	59	1.77085
Tb927.10.3160	0.359		843		99		0.377	1439	3.15806		0.328	59	1.77085
Tb927.10.9010	0.341		393		29		0.351	1437	3.15746		0.343	59	1.77085
Tb927.11.10820	0.391		2253		94		0.398	1437	3.15746		0.318	59	1.77085
Tb927.3.1400	0.358		904		43		0.353	1437	3.15746		0.34	59	1.77085
Tb927.3.3640	0.327		591		11		0.395	1437	3.15746		0.406	59	1.77085
Tb927.8.3120	0.289		137		20		0.465	1431	3.15564		0.371	59	1.77085
Tb927.10.13810	0.352		587		67		0.338	1431	3.15564		0.416	59	1.77085
Tb927.10.5560	0.327		836		38		0.354	1428	3.15473		0.322	59	1.77085
Tb927.10.8870	0.405		786		55		0.373	1426	3.15412		0.369	59	1.77085
Tb927.10.8020	0.413		13249		182		0.334	1424	3.15351		0.321	59	1.77085
Tb927.11.10420	0.335		1147		37		0.402	1423	3.1532		0.351	59	1.77085
Tb927.11.9260	0.362		146		7		0.337	1423	3.1532		0.345	59	1.77085
Tb927.5.2480	0.286		22		40		0.373	1421	3.15259		0.364	59	1.77085
Tb927.5.700	0.342		2886		44		0.368	1419	3.15198		0.365	59	1.77085
Tb927.8.4550	0.404		1079		69		0.335	1419	3.15198		0.357	59	1.77085
Tb927.10.7720	0.38		363		36		0.348	1416	3.15106		0.359	59	1.77085
Tb927.11.2530	0.358		1619		31		0.368	1415	3.15076		0.382	59	1.77085
Tb927.3.5610	0.409		871		30		0.355	1415	3.15076		0.393	59	1.77085
Tb927.8.5830	0.373		1426		84		0.39	1414	3.15045		0.412	59	1.77085
Tb927.10.1250	0.384		2474		70		0.345	1414	3.15045		0.358	59	1.77085
Tb927.11.6460	0.378		4659		144		0.367	1412	3.14983		0.333	59	1.77085
Tb927.3.5010	0.417		1197		203		0.368	1411	3.14953		0.356	59	1.77085
Tb927.7.850	0.34		1143		14		0.35	1410	3.14922		0.359	59	1.77085
Tb927.10.12060	0.342		1541		22		0.336	1410	3.14922		0.332	58	1.76343
Tb927.11.10380	0.334		642		55		0.361	1409	3.14891		0.349	58	1.76343
Tb927.11.9100	0.429		1346		116		0.324	1409	3.14891		0.339	58	1.76343
Tb927.7.3080	0.328		1212		27		0.351	1409	3.14891		0.333	58	1.76343
Tb927.8.2210	0.39		3858		85		0.341	1408	3.1486		0.362	58	1.76343
Tb927.8.5420	0.344		577		18		0.36	1408	3.1486		0.381	58	1.76343
Tb927.7.4380	0.335		507		9		0.34	1408	3.1486		0.348	58	1.76343
Tb927.9.5650	0.383		1025		106		0.343	1408	3.1486		0.338	58	1.76343
Tb927.10.15040	0.323		63		21		0.333	1406	3.14799		0.383	58	1.76343
Tb927.11.7540	0.369		1552		33		0.354	1406	3.14799		0.326	58	1.76343
Tb927.8.2600	0.396		1774		26		0.387	1404	3.14737		0.353	58	1.76343
Tb927.9.12280	0.322		285		20		0.382	1404	3.14737		0.383	58	1.76343
Tb927.11.3310	0.387		8579		871		0.334	1403	3.14706		0.347	58	1.76343
Tb927.11.6420	0.335		2696		30		0.368	1403	3.14706		0.385	58	1.76343
Tb927.11.6620	0.326		1287		43		0.387	1402	3.14675		0.357	58	1.76343
Tb927.11.9370	0.34		290		20		0.395	1402	3.14675		0.362	58	1.76343
Tb927.10.11230	0.365		335		18		0.355	1399	3.14582		0.399	58	1.76343
Tb927.10.6290	0.384		1198		28		0.358	1399	3.14582		0.356	58	1.76343
Tb927.3.1780	0.313		715		44		0.418	1399	3.14582		0.417	58	1.76343
Tb927.3.5130	0.398		806		19		0.346	1398	3.14551		0.406	58	1.76343
Tb927.7.320	0.431		1212		70		0.412	1395	3.14457		0.36	58	1.76343
Tb927.9.12030	0.347		521		58		0.338	1395	3.14457		0.352	58	1.76343
Tb927.11.13990	0.353		604		7		0.364	1395	3.14457		0.356	58	1.76343
Tb927.5.2830	0.321		423		219		0.356	1395	3.14457		0.351	58	1.76343
Tb927.4.3690	0.358		1535		29		0.349	1394	3.14426		0.373	58	1.76343
Tb927.11.14050	0.364		301		18		0.355	1392	3.14364		0.349	58	1.76343
Tb927.8.6060	0.387		16280		314		0.362	1392	3.14364		0.346	58	1.76343
Tb927.10.6210	0.348		316		16		0.363	1392	3.14364		0.365	58	1.76343
Tb927.11.5220	0.334		3020		81		0.354	1391	3.14333		0.355	58	1.76343
Tb927.5.2670	0.327		744		50		0.341	1389	3.1427		0.324	58	1.76343
Tb927.6.4490	0.324		377		23		0.344	1389	3.1427		0.35	58	1.76343
Tb927.8.3220	0.336		953		38		0.358	1388	3.14239		0.321	58	1.76343
Tb927.10.12360	0.429		1354		244		0.377	1388	3.14239		0.372	58	1.76343
Tb927.10.13450	0.341		1389		37		0.413	1387	3.14208		0.305	58	1.76343
Tb927.11.16940	0.32		556		9		0.393	1386	3.14176		0.374	57	1.75587
Tb927.6.3790	0.323		574		11		0.348	1386	3.14176		0.405	57	1.75587
Tb927.10.3200	0.349		2420		174		0.384	1383	3.14082		0.35	57	1.75587
Tb927.11.14500	0.342		164		9		0.333	1382	3.14051		0.366	57	1.75587
Tb927.5.1180	0.362		285		4		0.394	1382	3.14051		0.334	57	1.75587
Tb927.6.2010	0.363		3088		69		0.319	1381	3.14019		0.345	57	1.75587
Tb927.8.650	0.37		5833		93		0.374	1381	3.14019		0.342	57	1.75587
Tb927.11.7340	0.343		992		17		0.362	1381	3.14019		0.318	57	1.75587
Tb927.11.1820	0.348		2164		49		0.29	1381	3.14019		0.36	57	1.75587
Tb927.11.6660	0.363		1106		16		0.35	1380	3.13988		0.354	57	1.75587
Tb927.4.700	0.313		648		36		0.357	1379	3.13956		0.369	57	1.75587
Tb927.7.6820	0.354		1428		73		0.34	1379	3.13956		0.335	57	1.75587
Tb927.10.13840	0.337		620		101		0.336	1377	3.13893		0.332	57	1.75587
Tb927.10.2780	0.354		1471		17		0.374	1377	3.13893		0.341	57	1.75587
Tb927.11.11580	0.381		324		11		0.346	1376	3.13862		0.38	57	1.75587
Tb927.4.2220	0.364		1557		55		0.364	1376	3.13862		0.378	57	1.75587
Tb927.4.2680	0.349		1033		34		0.352	1375	3.1383		0.351	57	1.75587
Tb927.6.3830	0.346		16		0		0.382	1375	3.1383		0.364	57	1.75587
Tb927.10.15660	0.384		542		14		0.337	1375	3.1383		0.378	57	1.75587
Tb927.5.3860	0.358		705		40		0.353	1374	3.13799		0.405	57	1.75587
Tb927.8.1710	0.38		1483		56		0.363	1374	3.13799		0.319	57	1.75587
Tb927.8.4280	0.385		2819		319		0.333	1374	3.13799		0.345	56	1.74819
Tb927.9.8030	0.334		34		0		0.4	1373	3.13767		0.41	56	1.74819
Tb927.10.14490	0.39		4738		541		0.377	1373	3.13767		0.352	56	1.74819
Tb927.10.4830	0.361		1228		69		0.418	1373	3.13767		0.344	56	1.74819
Tb927.8.5300	0.371		2144		87		0.326	1372	3.13735		0.339	56	1.74819
Tb927.9.14190	0.312		185		0		0.39	1370	3.13672		0.383	56	1.74819
Tb927.7.4100	0.381		1508		80		0.349	1369	3.1364		0.346	56	1.74819
Tb927.11.4780	0.334		991		46		0.387	1368	3.13609		0.381	56	1.74819
Tb927.11.2960	0.316		457		31		0.338	1368	3.13609		0.356	56	1.74819
Tb927.9.1710	0.34		1045		49		0.347	1368	3.13609		0.355	56	1.74819
Tb927.11.16380	0.331		855		25		0.37	1367	3.13577		0.38	56	1.74819
Tb927.5.2650	0.365		2394		34		0.34	1367	3.13577		0.375	56	1.74819
Tb927.7.3280	0.389		779		10		0.401	1367	3.13577		0.347	56	1.74819
Tb927.10.3170	0.381		2465		49		0.333	1367	3.13577		0.323	56	1.74819
Tb927.11.13710	0.371		607		44		0.323	1366	3.13545		0.311	56	1.74819
Tb927.7.3820	0.293		847		22		0.32	1365	3.13513		0.345	56	1.74819
Tb927.10.15230	0.393		822		76		0.357	1365	3.13513		0.359	56	1.74819
Tb927.10.620	0.354		922		57		0.343	1363	3.1345		0.357	56	1.74819
Tb927.10.5430	0.362		1254		68		0.352	1362	3.13418		0.418	56	1.74819
Tb927.10.7600	0.367		1310		47		0.382	1362	3.13418		0.355	56	1.74819
Tb927.11.12450	0.349		351		9		0.353	1362	3.13418		0.385	56	1.74819
Tb927.5.2510	0.343		684		11		0.367	1361	3.13386		0.404	55	1.74036
Tb927.8.5670	0.395		250		26		0.403	1361	3.13386		0.348	55	1.74036
Tb927.9.11890	0.327		426		12		0.328	1361	3.13386		0.354	55	1.74036
Tb927.9.12690	0.31		328		18		0.334	1360	3.13354		0.346	55	1.74036
Tb927.7.5310	0.345		1589		24		0.349	1359	3.13322		0.373	55	1.74036
Tb927.5.1270	0.351		554		27		0.389	1359	3.13322		0.33	55	1.74036
Tb927.6.4630	0.346		2368		60		0.349	1358	3.1329		0.324	55	1.74036
Tb927.7.1770	0.345		863		13		0.365	1358	3.1329		0.388	55	1.74036
Tb927.10.6120	0.357		653		18		0.366	1358	3.1329		0.405	55	1.74036
Tb927.10.8060	0.355		2002		53		0.336	1357	3.13258		0.334	55	1.74036
Tb927.11.15640	0.382		1404		43		0.324	1356	3.13226		0.364	55	1.74036
Tb927.2.2450	0.36		1028		25		0.343	1356	3.13226		0.358	55	1.74036
Tb927.3.3740	0.352		778		8		0.429	1354	3.13162		0.413	55	1.74036
Tb927.10.3500	0.362		2336		42		0.394	1354	3.13162		0.347	55	1.74036
Tb927.10.6340	0.358		710		44		0.353	1354	3.13162		0.363	55	1.74036
Tb927.11.1320	0.379		2134		137		0.353	1351	3.13066		0.33	55	1.74036
Tb927.11.360	0.346		1130		13		0.385	1350	3.13033		0.367	55	1.74036
Tb927.11.870	0.359		1002		72		0.353	1350	3.13033		0.338	55	1.74036
Tb927.8.2170	0.292		345		17		0.357	1350	3.13033		0.36	55	1.74036
Tb927.8.770	0.335		450		13		0.334	1349	3.13001		0.32	55	1.74036
Tb927.10.12420	0.35		541		50		0.367	1349	3.13001		0.342	55	1.74036
Tb927.11.640	0.37		1261		34		0.338	1349	3.13001		0.374	55	1.74036
Tb927.10.2160	0.347		1479		105		0.451	1348	3.12969		0.335	55	1.74036
Tb927.10.3850	0.329		366		5		0.338	1348	3.12969		0.361	55	1.74036
Tb927.6.3130	0.364		680		22		0.425	1348	3.12969		0.333	55	1.74036
Tb927.5.3310	0.357		710		45		0.3	1348	3.12969		0.346	55	1.74036
Tb927.9.13630	0.302		315		7		0.429	1346	3.12905		0.37	55	1.74036
Tb927.9.8180	0.336		2242		91		0.376	1346	3.12905		0.352	55	1.74036
Tb927.9.13280	0.393		1199		28		0.34	1346	3.12905		0.36	55	1.74036
Tb927.1.3170	0.408		2854		62		0.411	1345	3.12872		0.373	55	1.74036
Tb927.10.1240	0.347		175		6		0.363	1345	3.12872		0.385	55	1.74036
Tb927.10.9840	0.396		1295		62		0.334	1343	3.12808		0.414	55	1.74036
Tb927.11.7270	0.399		5103		298		0.358	1343	3.12808		0.355	54	1.73239
Tb927.2.5130	0.323		2701		51		0.396	1342	3.12775		0.348	54	1.73239
Tb927.3.4460	0.347		31		11		0.376	1342	3.12775		0.363	54	1.73239
Tb927.7.3340	0.382		524		12		0.354	1341	3.12743		0.36	54	1.73239
Tb927.9.8160	0.324		3385		135		0.348	1341	3.12743		0.329	54	1.73239
Tb927.10.1860	0.344		1190		64		0.374	1340	3.1271		0.361	54	1.73239
Tb927.11.10630	0.33		637		15		0.313	1339	3.12678		0.341	54	1.73239
Tb927.11.16670	0.358		2104		55		0.341	1337	3.12613		0.347	54	1.73239
Tb927.6.1250	0.37		1367		40		0.391	1334	3.12516		0.401	54	1.73239
Tb927.10.13110	0.396		667		240		0.398	1333	3.12483		0.348	54	1.73239
Tb927.10.2210	0.342		1833		22		0.345	1326	3.12254		0.34	54	1.73239
Tb927.10.5860	0.424		871		121		0.357	1326	3.12254		0.344	54	1.73239
Tb927.10.7520	0.353		351		8		0.354	1326	3.12254		0.326	54	1.73239
Tb927.2.2220	0.323		866		22		0.366	1326	3.12254		0.332	54	1.73239
Tb927.3.5380	0.331		233		11		0.362	1324	3.12189		0.375	54	1.73239
Tb927.7.5520	0.326		963		48		0.365	1324	3.12189		0.391	54	1.73239
Tb927.8.920	0.308		1001		107		0.323	1324	3.12189		0.349	54	1.73239
Tb927.9.9670	0.403		4556		237		0.345	1324	3.12189		0.39	54	1.73239
Tb927.5.590	0.397		1181		45		0.363	1323	3.12156		0.329	54	1.73239
Tb927.9.14140	0.316		750		20		0.422	1323	3.12156		0.35	54	1.73239
Tb927.3.620	0.353		902		15		0.352	1323	3.12156		0.373	54	1.73239
Tb927.4.3300	0.361		1110		31		0.364	1322	3.12123		0.4	53	1.72428
Tb927.8.1560	0.385		1084		58		0.315	1322	3.12123		0.413	53	1.72428
Tb927.10.1950	0.31		322		8		0.341	1322	3.12123		0.364	53	1.72428
Tb927.11.10990	0.38		3578		40		0.338	1320	3.12057		0.377	53	1.72428
Tb927.6.1680	0.356		953		23		0.355	1320	3.12057		0.37	53	1.72428
Tb927.7.4480	0.387		2558		448		0.354	1319	3.12024		0.373	53	1.72428
Tb927.11.10530	0.338		133		6		0.373	1317	3.11959		0.341	53	1.72428
Tb927.3.2680	0.355		1247		32		0.335	1316	3.11926		0.387	53	1.72428
Tb927.9.2620	0.365		1256		19		0.375	1313	3.11826		0.361	53	1.72428
Tb927.11.13560	0.353		455		11		0.379	1312	3.11793		0.355	53	1.72428
Tb927.3.1860	0.344		565		12		0.358	1312	3.11793		0.369	53	1.72428
Tb927.6.3040	0.375		851		56		0.338	1311	3.1176		0.357	53	1.72428
Tb927.7.5050	0.386		2677		75		0.379	1311	3.1176		0.337	53	1.72428
Tb927.8.6040	0.355		677		9		0.382	1311	3.1176		0.424	53	1.72428
Tb927.9.11070	0.328		684		27		0.367	1310	3.11727		0.375	53	1.72428
Tb927.9.13110	0.398		1333		29		0.363	1310	3.11727		0.37	53	1.72428
Tb927.11.14990	0.342		960		21		0.324	1310	3.11727		0.323	53	1.72428
Tb927.11.2910	0.374		1026		48		0.369	1309	3.11694		0.355	53	1.72428
Tb927.11.2950	0.335		2749		50		0.366	1309	3.11694		0.376	53	1.72428
Tb927.3.950	0.357		464		13		0.359	1308	3.11661		0.351	53	1.72428
Tb927.6.1590	0.352		514		15		0.349	1308	3.11661		0.356	53	1.72428
Tb927.10.3340	0.349		838		29		0.346	1307	3.11628		0.366	53	1.72428
Tb927.10.6490	0.397		908		193		0.34	1306	3.11594		0.364	53	1.72428
Tb927.11.3970	0.378		3333		75		0.36	1305	3.11561		0.359	53	1.72428
Tb927.11.8980	0.343		600		9		0.354	1305	3.11561		0.338	53	1.72428
Tb927.11.9160	0.343		25		4		0.354	1305	3.11561		0.366	53	1.72428
Tb927.5.3460	0.359		678		20		0.398	1304	3.11528		0.356	53	1.72428
Tb927.7.4300	0.357		297		11		0.302	1303	3.11494		0.366	53	1.72428
Tb927.8.3350	0.338		683		17		0.363	1300	3.11394		0.333	53	1.72428
Tb927.9.10970	0.348		471		20		0.337	1299	3.11361		0.381	53	1.72428
Tb927.9.11640	0.303		519		123		0.357	1299	3.11361		0.359	53	1.72428
Tb927.10.13850	0.369		810		27		0.366	1298	3.11327		0.357	53	1.72428
Tb927.11.16350	0.322		1206		115		0.368	1296	3.11261		0.374	52	1.716
Tb927.3.2340	0.344		1221		44		0.347	1295	3.11227		0.34	52	1.716
Tb927.9.6760	0.4		332		18		0.396	1295	3.11227		0.386	52	1.716
Tb927.3.1930	0.338		990		27		0.348	1295	3.11227		0.376	52	1.716
Tb927.4.3310	0.334		1144		27		0.385	1294	3.11193		0.393	52	1.716
Tb927.8.4690	0.372		849		88		0.33	1294	3.11193		0.338	52	1.716
Tb927.8.7540	0.357		482		5		0.338	1293	3.1116		0.343	52	1.716
Tb927.3.2410	0.351		1034		41		0.338	1293	3.1116		0.42	52	1.716
Tb927.9.2910	0.335		425		21		0.335	1293	3.1116		0.352	52	1.716
Tb927.11.1430	0.404		6820		261		0.388	1291	3.11093		0.369	52	1.716
Tb927.3.4640	0.326		608		115		0.34	1291	3.11093		0.338	52	1.716
Tb927.5.1230	0.399		1670		78		0.341	1290	3.11059		0.366	52	1.716
Tb927.5.3720	0.324		50		1		0.334	1290	3.11059		0.352	52	1.716
Tb927.7.6260	0.355		2357		139		0.339	1289	3.11025		0.358	52	1.716
Tb927.8.6420	0.342		505		14		0.341	1288	3.10992		0.322	52	1.716
Tb927.10.4530	0.324		262		14		0.348	1288	3.10992		0.346	52	1.716
Tb927.10.6090	0.346		418		11		0.361	1288	3.10992		0.341	52	1.716
Tb927.11.16050	0.366		920		27		0.39	1288	3.10992		0.368	52	1.716
Tb927.9.14400	0.334		718		22		0.375	1288	3.10992		0.334	52	1.716
Tb927.10.5530	0.362		608		16		0.324	1287	3.10958		0.359	52	1.716
Tb927.6.1280	0.344		1036		32		0.361	1287	3.10958		0.37	52	1.716
Tb927.8.5200	0.374		2345		30		0.326	1287	3.10958		0.37	52	1.716
Tb927.10.1620	0.318		2239		59		0.38	1287	3.10958		0.398	52	1.716
Tb927.11.11630	0.39		1523		47		0.398	1283	3.10823		0.397	52	1.716
Tb927.7.5670	0.393		1249		31		0.346	1282	3.10789		0.356	52	1.716
Tb927.9.3470	0.359		717		24		0.365	1278	3.10653		0.356	52	1.716
Tb927.9.3750	0.327		584		35		0.364	1278	3.10653		0.378	52	1.716
Tb927.11.14860	0.366		427		7		0.373	1277	3.10619		0.351	52	1.716
Tb927.3.1210	0.357		3333		58		0.349	1276	3.10585		0.353	52	1.716
Tb927.3.5170	0.317		546		10		0.315	1276	3.10585		0.289	52	1.716
Tb927.5.3260	0.343		1720		39		0.394	1275	3.10551		0.369	51	1.70757
Tb927.8.5020	0.398		929		47		0.339	1275	3.10551		0.354	51	1.70757
Tb927.9.6270	0.352		907		9		0.404	1275	3.10551		0.363	51	1.70757
Tb927.11.14880	0.431		4857		415		0.352	1274	3.10517		0.378	51	1.70757
Tb927.7.5140	0.364		1505		44		0.321	1269	3.10346		0.384	51	1.70757
Tb927.3.4550	0.367		214		15		0.321	1268	3.10312		0.359	51	1.70757
Tb927.9.6150	0.323		867		20		0.367	1268	3.10312		0.371	51	1.70757
Tb927.1.4220	0.312		876		26		0.289	1268	3.10312		0.342	51	1.70757
Tb927.6.3610	0.326		731		37		0.33	1267	3.10278		0.323	51	1.70757
Tb927.8.2690	0.334		807		14		0.343	1267	3.10278		0.432	51	1.70757
Tb927.10.2070	0.351		982		26		0.383	1267	3.10278		0.336	51	1.70757
Tb927.11.3640	0.34		1223		110		0.359	1265	3.10209		0.4	51	1.70757
Tb927.11.5290	0.345		2952		132		0.355	1265	3.10209		0.398	51	1.70757
Tb927.3.5190	0.376		420		43		0.339	1264	3.10175		0.373	51	1.70757
Tb927.7.4790	0.424		9786		416		0.33	1263	3.1014		0.343	51	1.70757
Tb927.1.4180	0.369		1054		52		0.417	1261	3.10072		0.357	51	1.70757
Tb927.3.1670	0.372		1618		34		0.37	1261	3.10072		0.343	51	1.70757
Tb927.3.2760	0.331		532		3		0.351	1261	3.10072		0.363	51	1.70757
Tb927.1.3880	0.348		1008		19		0.382	1260	3.10037		0.333	51	1.70757
Tb927.11.13810	0.378		1139		35		0.383	1259	3.10003		0.364	51	1.70757
Tb927.4.1350	0.36		126		14		0.39	1258	3.09968		0.36	51	1.70757
Tb927.11.4230	0.343		1557		19		0.38	1258	3.09968		0.281	51	1.70757
Tb927.4.1120	0.338		1615		52		0.362	1258	3.09968		0.302	51	1.70757
Tb927.6.2000	0.366		976		31		0.372	1257	3.09934		0.364	51	1.70757
Tb927.6.2500	0.337		253		7		0.365	1256	3.09899		0.35	51	1.70757
Tb927.9.14100	0.348		1223		75		0.363	1256	3.09899		0.328	51	1.70757
Tb927.11.15280	0.323		241		6		0.365	1256	3.09899		0.296	51	1.70757
Tb927.4.1810	0.483		990		121		0.352	1254	3.0983		0.353	51	1.70757
Tb927.4.590	0.345		6903		101		0.314	1254	3.0983		0.363	51	1.70757
Tb927.10.11530	0.382		1109		82		0.362	1254	3.0983		0.359	51	1.70757
Tb927.10.6530	0.308		1218		22		0.358	1254	3.0983		0.39	51	1.70757
Tb927.8.2740	0.381		4383		136		0.352	1252	3.0976		0.359	51	1.70757
Tb927.9.12850	0.367		448		15		0.342	1252	3.0976		0.447	51	1.70757
Tb927.11.13590	0.338		383		18		0.348	1251	3.09726		0.353	51	1.70757
Tb927.3.1810	0.354		1153		38		0.354	1251	3.09726		0.386	51	1.70757
Tb927.10.12900	0.367		301		34		0.341	1251	3.09726		0.302	51	1.70757
Tb927.10.160	0.319		465		19		0.363	1250	3.09691		0.393	51	1.70757
Tb927.10.7250	0.329		798		14		0.377	1250	3.09691		0.389	51	1.70757
Tb927.6.4130	0.394		4545		296		0.364	1250	3.09691		0.383	51	1.70757
Tb927.7.2550	0.418		4400		125		0.399	1250	3.09691		0.353	51	1.70757
Tb927.10.14440	0.342		435		26		0.328	1249	3.09656		0.325	51	1.70757
Tb927.2.3080	0.34		6531		393		0.393	1249	3.09656		0.349	51	1.70757
Tb927.3.2930	0.389		54		19		0.343	1248	3.09621		0.403	50	1.69897
Tb927.6.3530	0.332		1824		73		0.37	1248	3.09621		0.366	50	1.69897
Tb927.7.970	0.354		1982		31		0.355	1247	3.09587		0.371	50	1.69897
Tb927.9.13540	0.368		1045		21		0.326	1247	3.09587		0.362	50	1.69897
Tb927.10.8960	0.412		388		16		0.332	1246	3.09552		0.394	50	1.69897
Tb927.6.3330	0.337		466		29		0.329	1246	3.09552		0.414	50	1.69897
Tb927.6.950	0.371		8442		104		0.361	1245	3.09517		0.337	50	1.69897
Tb927.10.5310	0.353		2275		61		0.364	1243	3.09447		0.405	50	1.69897
Tb927.11.2200	0.408		588		65		0.362	1240	3.09342		0.368	50	1.69897
Tb927.11.8420	0.373		355		34		0.364	1240	3.09342		0.386	50	1.69897
Tb927.3.1750	0.304		138		21		0.393	1240	3.09342		0.327	50	1.69897
Tb927.5.1460	0.416		6782		644		0.394	1240	3.09342		0.35	50	1.69897
Tb927.5.3620	0.332		787		195		0.465	1239	3.09307		0.335	50	1.69897
Tb927.9.7090	0.317		311		10		0.368	1239	3.09307		0.35	50	1.69897
Tb927.11.13880	0.351		360		3		0.323	1239	3.09307		0.336	50	1.69897
Tb927.11.16680	0.333		201		3		0.462	1238	3.09272		0.361	50	1.69897
Tb927.2.5760	0.337		9333		68		0.326	1238	3.09272		0.373	50	1.69897
Tb927.9.10770	0.433		38000		666		0.313	1236	3.09202		0.378	50	1.69897
Tb927.9.9580	0.376		854		24		0.368	1235	3.09167		0.358	50	1.69897
Tb927.10.6670	0.383		1050		231		0.343	1235	3.09167		0.337	50	1.69897
Tb927.11.1250	0.354		3080		45		0.353	1235	3.09167		0.33	50	1.69897
Tb927.11.14560	0.34		3556		32		0.368	1235	3.09167		0.371	50	1.69897
Tb927.11.5010	0.337		613		17		0.34	1235	3.09167		0.334	50	1.69897
Tb927.6.2430	0.346		534		18		0.36	1235	3.09167		0.353	50	1.69897
Tb927.6.5010	0.37		833		185		0.396	1233	3.09096		0.342	50	1.69897
Tb927.10.13610	0.357		430		28		0.393	1233	3.09096		0.321	50	1.69897
Tb927.7.1650	0.338		499		10		0.395	1232	3.09061		0.34	50	1.69897
Tb927.7.2390	0.367		2971		28		0.326	1232	3.09061		0.337	50	1.69897
Tb927.9.5240	0.343		1356		14		0.419	1232	3.09061		0.34	50	1.69897
Tb927.11.14940	0.336		298		5		0.331	1231	3.09026		0.356	50	1.69897
Tb927.11.3050	0.342		250		5		0.39	1231	3.09026		0.35	50	1.69897
Tb927.11.8390	0.372		635		22		0.324	1231	3.09026		0.373	50	1.69897
Tb927.2.2210	0.339		957		11		0.314	1230	3.08991		0.377	50	1.69897
Tb927.4.1710	0.397		1040		42		0.407	1229	3.08955		0.338	50	1.69897
Tb927.11.2220	0.371		202		16		0.343	1229	3.08955		0.385	50	1.69897
Tb927.3.1540	0.321		146		8		0.353	1229	3.08955		0.383	50	1.69897
Tb927.3.1970	0.361		1288		25		0.324	1229	3.08955		0.288	50	1.69897
Tb927.8.3790	0.333		1406		175		0.361	1228	3.0892		0.36	50	1.69897
Tb927.9.2100	0.339		487		9		0.383	1228	3.0892		0.325	50	1.69897
Tb927.10.15130	0.369		568		57		0.347	1227	3.08884		0.365	50	1.69897
Tb927.5.2470	0.349		465		47		0.359	1227	3.08884		0.388	49	1.6902
Tb927.8.1310	0.336		1006		15		0.372	1227	3.08884		0.391	49	1.6902
Tb927.9.11110	0.378		2636		24		0.334	1226	3.08849		0.377	49	1.6902
Tb927.8.6220	0.338		830		13		0.333	1226	3.08849		0.38	49	1.6902
Tb927.11.5680	0.407		1001		105		0.373	1226	3.08849		0.442	49	1.6902
Tb927.11.6630	0.363		1688		41		0.355	1224	3.08778		0.344	49	1.6902
Tb927.3.2000	0.382		325		16		0.34	1223	3.08743		0.397	49	1.6902
Tb927.4.900	0.329		356		21		0.348	1223	3.08743		0.345	49	1.6902
Tb927.10.310	0.367		3210		98		0.389	1223	3.08743		0.388	49	1.6902
Tb927.2.4050	0.387		4641		72		0.411	1223	3.08743		0.383	49	1.6902
Tb927.3.1150	0.35		1410		50		0.361	1221	3.08672		0.351	49	1.6902
Tb927.3.2290	0.371		591		29		0.344	1221	3.08672		0.348	49	1.6902
Tb927.3.5200	0.341		489		39		0.378	1221	3.08672		0.34	49	1.6902
Tb927.8.1350	0.347		591		26		0.388	1220	3.08636		0.381	49	1.6902
Tb927.9.2730	0.34		1367		27		0.308	1218	3.08565		0.404	49	1.6902
Tb927.10.10740	0.301		721		14		0.329	1218	3.08565		0.363	49	1.6902
Tb927.10.13880	0.332		718		18		0.329	1216	3.08493		0.377	49	1.6902
Tb927.10.15140	0.374		4355		383		0.354	1216	3.08493		0.351	49	1.6902
Tb927.4.1470	0.378		527		35		0.369	1216	3.08493		0.348	49	1.6902
Tb927.4.730	0.374		1012		21		0.344	1215	3.08458		0.358	49	1.6902
Tb927.10.13320	0.373		1149		71		0.349	1215	3.08458		0.29	49	1.6902
Tb927.11.14240	0.327		684		6		0.371	1214	3.08422		0.344	49	1.6902
Tb927.3.2080	0.389		971		30		0.369	1214	3.08422		0.365	49	1.6902
Tb927.3.2670	0.367		1361		64		0.35	1214	3.08422		0.366	49	1.6902
Tb927.4.390	0.318		120		21		0.333	1213	3.08386		0.365	49	1.6902
Tb927.7.3110	0.341		1103		14		0.328	1212	3.0835		0.367	49	1.6902
Tb927.9.2060	0.34		1052		28		0.431	1212	3.0835		0.356	49	1.6902
Tb927.10.6770	0.287		290		9		0.366	1211	3.08314		0.355	49	1.6902
Tb927.10.9060	0.342		897		31		0.383	1211	3.08314		0.331	49	1.6902
Tb927.3.1990	0.345		832		48		0.403	1211	3.08314		0.355	49	1.6902
Tb927.8.1960	0.343		3507		147		0.355	1210	3.08279		0.377	49	1.6902
Tb927.6.4750	0.342		2012		30		0.335	1209	3.08243		0.352	49	1.6902
Tb927.8.1550	0.402		9747		362		0.374	1208	3.08207		0.314	49	1.6902
Tb927.10.9790	0.432		539		51		0.377	1207	3.08171		0.343	49	1.6902
Tb927.11.1000	0.382		223		35		0.306	1207	3.08171		0.374	49	1.6902
Tb927.11.5810	0.405		768		46		0.365	1207	3.08171		0.331	49	1.6902
Tb927.5.3870	0.326		761		12		0.351	1207	3.08171		0.344	49	1.6902
Tb927.9.1530	0.341		297		3		0.388	1206	3.08135		0.347	49	1.6902
Tb927.10.650	0.431		745		90		0.322	1206	3.08135		0.34	49	1.6902
Tb927.11.15430	0.364		1491		18		0.363	1205	3.08099		0.333	49	1.6902
Tb927.2.4000	0.323		920		6		0.334	1205	3.08099		0.402	49	1.6902
Tb927.9.2650	0.368		1415		45		0.321	1204	3.08063		0.347	48	1.68124
Tb927.9.8820	0.377		1693		35		0.36	1203	3.08027		0.362	48	1.68124
Tb927.10.550	0.34		567		23		0.358	1203	3.08027		0.341	48	1.68124
Tb927.11.11030	0.347		850		31		0.355	1202	3.0799		0.43	48	1.68124
Tb927.11.1950	0.332		577		33		0.383	1200	3.07918		0.394	48	1.68124
Tb927.3.3230	0.357		1174		13		0.359	1200	3.07918		0.366	48	1.68124
Tb927.7.3900	0.348		2910		146		0.354	1200	3.07918		0.36	48	1.68124
Tb927.7.4900	0.365		5324		87		0.393	1199	3.07882		0.354	48	1.68124
Tb927.11.560	0.349		458		17		0.369	1199	3.07882		0.361	48	1.68124
Tb927.7.5640	0.389		923		37		0.36	1199	3.07882		0.326	48	1.68124
Tb927.10.8070	0.347		354		9		0.356	1199	3.07882		0.374	48	1.68124
Tb927.11.330	0.348		1416		35		0.384	1198	3.07846		0.345	48	1.68124
Tb927.6.2850	0.371		723		17		0.34	1198	3.07846		0.42	48	1.68124
Tb927.3.910	0.369		1566		36		0.356	1197	3.07809		0.387	48	1.68124
Tb927.7.540	0.329		2367		72		0.417	1197	3.07809		0.366	48	1.68124
Tb927.8.2710	0.337		655		6		0.396	1197	3.07809		0.324	48	1.68124
Tb927.9.7210	0.351		538		7		0.39	1196	3.07773		0.352	48	1.68124
Tb927.11.13100	0.313		353		13		0.342	1196	3.07773		0.36	48	1.68124
Tb927.7.1560	0.354		868		19		0.365	1195	3.07737		0.351	48	1.68124
Tb927.7.2740	0.314		1230		65		0.342	1195	3.07737		0.336	48	1.68124
Tb927.10.5540	0.312		687		44		0.384	1195	3.07737		0.342	48	1.68124
Tb927.11.420	0.418		742		110		0.402	1194	3.077		0.32	48	1.68124
Tb927.11.9550	0.382		1311		46		0.353	1193	3.07664		0.362	48	1.68124
Tb927.4.1720	0.358		1399		64		0.374	1191	3.07591		0.361	48	1.68124
Tb927.9.13510	0.358		2503		89		0.31	1190	3.07555		0.373	48	1.68124
Tb927.11.13960	0.35		668		69		0.344	1190	3.07555		0.357	48	1.68124
Tb927.11.9750	0.405		625		14		0.323	1190	3.07555		0.355	48	1.68124
Tb927.3.2840	0.408		1012		37		0.33	1189	3.07518		0.384	48	1.68124
Tb927.10.7560	0.337		596		19		0.356	1189	3.07518		0.327	48	1.68124
Tb927.11.15070	0.323		813		9		0.351	1188	3.07482		0.335	48	1.68124
Tb927.11.4590	0.311		243		12		0.365	1187	3.07445		0.407	48	1.68124
Tb927.6.1290	0.32		1882		26		0.359	1184	3.07335		0.395	48	1.68124
Tb927.6.2470	0.333		606		14		0.361	1184	3.07335		0.357	48	1.68124
Tb927.10.14340	0.357		1545		45		0.338	1184	3.07335		0.343	48	1.68124
Tb927.10.1970	0.367		2310		60		0.332	1184	3.07335		0.353	48	1.68124
Tb927.3.4700	0.362		170		20		0.34	1182	3.07262		0.359	48	1.68124
Tb927.9.8710	0.328		1165		47		0.397	1181	3.07225		0.4	48	1.68124
Tb927.11.13900	0.406		527		91		0.404	1181	3.07225		0.336	48	1.68124
Tb927.8.6460	0.34		508		37		0.338	1180	3.07188		0.397	48	1.68124
Tb927.6.1430	0.409		1901		40		0.363	1180	3.07188		0.392	47	1.6721
Tb927.6.4670	0.419		6514		169		0.338	1179	3.07151		0.351	47	1.6721
Tb927.10.11570	0.331		836		25		0.328	1179	3.07151		0.356	47	1.6721
Tb927.10.15810	0.416		599		40		0.348	1179	3.07151		0.353	47	1.6721
Tb927.10.1740	0.379		676		19		0.348	1178	3.07115		0.367	47	1.6721
Tb927.11.12750	0.315		1727		65		0.352	1176	3.07041		0.39	47	1.6721
Tb927.8.6320	0.325		143		4		0.377	1175	3.07004		0.398	47	1.6721
Tb927.10.5120	0.349		1276		100		0.357	1174	3.06967		0.349	47	1.6721
Tb927.11.12830	0.332		1073		18		0.384	1174	3.06967		0.328	47	1.6721
Tb927.11.2340	0.347		999		56		0.323	1172	3.06893		0.349	47	1.6721
Tb927.3.1160	0.342		538		16		0.339	1172	3.06893		0.371	47	1.6721
Tb927.6.1810	0.349		957		47		0.345	1170	3.06819		0.354	47	1.6721
Tb927.6.4240	0.314		690		44		0.366	1168	3.06744		0.336	47	1.6721
Tb927.9.15090	0.385		3943		312		0.384	1168	3.06744		0.357	47	1.6721
Tb927.9.4050	0.302		604		24		0.392	1167	3.06707		0.359	47	1.6721
Tb927.11.7970	0.332		480		33		0.347	1167	3.06707		0.375	47	1.6721
Tb927.11.4550	0.403		721		83		0.398	1166	3.0667		0.328	47	1.6721
Tb927.3.2060	0.346		311		19		0.344	1166	3.0667		0.344	47	1.6721
Tb927.6.3990	0.388		871		35		0.328	1165	3.06633		0.384	47	1.6721
Tb927.11.11340	0.325		844		21		0.406	1165	3.06633		0.324	47	1.6721
Tb927.11.7470	0.429		1139		139		0.376	1164	3.06595		0.345	47	1.6721
Tb927.3.5320	0.333		1037		41		0.406	1164	3.06595		0.4	47	1.6721
Tb927.7.6190	0.316		782		66		0.36	1162	3.06521		0.36	47	1.6721
Tb927.11.10410	0.307		422		25		0.331	1161	3.06483		0.318	47	1.6721
Tb927.11.10510	0.368		2092		105		0.421	1158	3.06371		0.428	47	1.6721
Tb927.11.8880	0.339		1696		39		0.371	1158	3.06371		0.346	47	1.6721
Tb927.7.7150	0.361		300		8		0.395	1158	3.06371		0.418	47	1.6721
Tb927.10.1300	0.338		203		5		0.385	1158	3.06371		0.329	47	1.6721
Tb927.11.2440	0.341		662		26		0.383	1156	3.06296		0.367	47	1.6721
Tb927.6.2870	0.323		66		4		0.377	1155	3.06258		0.374	47	1.6721
Tb927.7.990	0.331		2912		33		0.39	1154	3.06221		0.366	46	1.66276
Tb927.9.2280	0.427		518		64		0.365	1154	3.06221		0.4	46	1.66276
Tb927.10.2800	0.374		1484		95		0.354	1153	3.06183		0.394	46	1.66276
Tb927.11.10360	0.327		338		33		0.426	1152	3.06145		0.312	46	1.66276
Tb927.11.8010	0.335		364		13		0.329	1152	3.06145		0.396	46	1.66276
Tb927.5.3760	0.315		38		1		0.347	1151	3.06108		0.39	46	1.66276
Tb927.8.4850	0.362		650		25		0.378	1151	3.06108		0.345	46	1.66276
Tb927.10.8560	0.355		288		20		0.373	1149	3.06032		0.334	46	1.66276
Tb927.11.6080	0.391		509		27		0.365	1149	3.06032		0.405	46	1.66276
Tb927.11.5200	0.4		472		43		0.428	1148	3.05994		0.382	46	1.66276
Tb927.11.7360	0.289		784		42		0.353	1147	3.05956		0.324	46	1.66276
Tb927.3.3530	0.314		546		9		0.335	1147	3.05956		0.348	46	1.66276
Tb927.4.2780	0.365		605		10		0.348	1147	3.05956		0.331	46	1.66276
Tb927.10.11800	0.34		534		60		0.362	1146	3.05918		0.358	46	1.66276
Tb927.11.5170	0.331		531		24		0.328	1145	3.05881		0.346	46	1.66276
Tb927.6.5020	0.338		6		0		0.334	1144	3.05843		0.353	46	1.66276
Tb927.7.5660	0.371		1813		115		0.361	1144	3.05843		0.366	46	1.66276
Tb927.3.4380	0.324		535		21		0.419	1143	3.05805		0.346	46	1.66276
Tb927.7.1220	0.368		1983		30		0.34	1143	3.05805		0.377	46	1.66276
Tb927.11.10400	0.415		860		76		0.416	1143	3.05805		0.362	46	1.66276
Tb927.11.11270	0.313		758		31		0.36	1143	3.05805		0.376	46	1.66276
Tb927.11.1760	0.318		503		23		0.37	1143	3.05805		0.353	46	1.66276
Tb927.10.6020	0.405		1499		103		0.398	1143	3.05805		0.344	46	1.66276
Tb927.11.15320	0.321		379		10		0.347	1143	3.05805		0.304	46	1.66276
Tb927.11.4150	0.317		303		6		0.351	1142	3.05767		0.352	46	1.66276
Tb927.3.2910	0.341		147		122		0.272	1142	3.05767		0.385	46	1.66276
Tb927.3.3820	0.324		1875		96		0.363	1142	3.05767		0.348	46	1.66276
Tb927.10.2040	0.343		1565		33		0.378	1139	3.05652		0.363	46	1.66276
Tb927.10.7050	0.358		869		13		0.429	1139	3.05652		0.358	46	1.66276
Tb927.2.4140	0.325		2176		27		0.376	1139	3.05652		0.356	46	1.66276
Tb927.5.3700	0.372		1927		128		0.385	1139	3.05652		0.372	46	1.66276
Tb927.10.15000	0.396		1569		105		0.328	1139	3.05652		0.382	46	1.66276
Tb927.11.5890	0.357		154		29		0.438	1138	3.05614		0.366	46	1.66276
Tb927.11.9400	0.382		4376		116		0.379	1137	3.05576		0.38	46	1.66276
Tb927.10.13330	0.344		973		14		0.4	1137	3.05576		0.32	46	1.66276
Tb927.10.15740	0.314		920		34		0.338	1135	3.055		0.37	46	1.66276
Tb927.11.9820	0.336		2160		51		0.317	1134	3.05461		0.357	46	1.66276
Tb927.3.3490	0.451		3315		308		0.385	1134	3.05461		0.325	46	1.66276
Tb927.3.3520	0.358		714		22		0.348	1134	3.05461		0.326	46	1.66276
Tb927.5.490	0.333		590		9		0.368	1133	3.05423		0.336	46	1.66276
Tb927.7.5280	0.328		858		8		0.354	1133	3.05423		0.354	46	1.66276
Tb927.8.570	0.365		1858		137		0.358	1132	3.05385		0.361	46	1.66276
Tb927.10.12040	0.398		1304		160		0.361	1131	3.05346		0.316	46	1.66276
Tb927.11.11010	0.456		5159		634		0.345	1130	3.05308		0.381	45	1.65321
Tb927.11.15980	0.335		338		14		0.346	1130	3.05308		0.34	45	1.65321
Tb927.11.7212	0.371		1557		47		0.349	1130	3.05308		0.352	45	1.65321
Tb927.2.3160	0.327		928		18		0.337	1129	3.05269		0.344	45	1.65321
Tb927.5.2970	0.347		1041		16		0.342	1128	3.05231		0.314	45	1.65321
Tb927.10.13120	0.348		481		13		0.365	1128	3.05231		0.382	45	1.65321
Tb927.10.1910	0.34		1498		22		0.352	1127	3.05192		0.397	45	1.65321
Tb927.4.4690	0.422		1840		228		0.399	1127	3.05192		0.377	45	1.65321
Tb927.6.3440	0.325		157		9		0.362	1126	3.05154		0.335	45	1.65321
Tb927.7.720	0.343		541		2		0.388	1126	3.05154		0.395	45	1.65321
Tb927.10.16090	0.376		590		6		0.341	1126	3.05154		0.374	45	1.65321
Tb927.10.580	0.348		200		4		0.372	1126	3.05154		0.387	45	1.65321
Tb927.10.6780	0.366		1577		52		0.38	1126	3.05154		0.355	45	1.65321
Tb927.10.9860	0.366		623		14		0.312	1126	3.05154		0.371	45	1.65321
Tb927.11.6710	0.342		431		44		0.38	1125	3.05115		0.341	45	1.65321
Tb927.11.7030	0.359		371		13		0.35	1124	3.05077		0.357	45	1.65321
Tb927.11.7330	0.339		1728		68		0.357	1123	3.05038		0.397	45	1.65321
Tb927.6.5070	0.379		8358		452		0.341	1123	3.05038		0.354	45	1.65321
Tb927.1.3390	0.368		996		79		0.325	1123	3.05038		0.368	45	1.65321
Tb927.11.2970	0.343		709		15		0.348	1123	3.05038		0.357	45	1.65321
Tb927.4.4300	0.353		321		11		0.348	1122	3.04999		0.376	45	1.65321
Tb927.11.16830	0.395		1402		123		0.373	1122	3.04999		0.37	45	1.65321
Tb927.3.3330	0.351		3501		244		0.337	1121	3.04961		0.338	45	1.65321
Tb927.5.1800	0.338		1180		120		0.348	1121	3.04961		0.345	45	1.65321
Tb927.9.3460	0.364		397		6		0.373	1120	3.04922		0.384	45	1.65321
Tb927.10.1870	0.362		1036		58		0.354	1119	3.04883		0.34	45	1.65321
Tb927.11.10250	0.393		131		15		0.352	1118	3.04844		0.363	45	1.65321
Tb927.3.5470	0.42		484		48		0.369	1117	3.04805		0.39	45	1.65321
Tb927.5.1980	0.335		548		37		0.349	1117	3.04805		0.375	45	1.65321
Tb927.7.3420	0.394		817		137		0.339	1117	3.04805		0.352	45	1.65321
Tb927.10.11610	0.354		233		47		0.364	1117	3.04805		0.339	45	1.65321
Tb927.10.13680	0.319		646		15		0.341	1116	3.04766		0.343	45	1.65321
Tb927.10.9150	0.395		982		40		0.36	1116	3.04766		0.346	45	1.65321
Tb927.2.4380	0.353		1235		28		0.383	1116	3.04766		0.357	45	1.65321
Tb927.4.2840	0.441		1478		115		0.382	1115	3.04727		0.365	45	1.65321
Tb927.5.1690	0.403		1361		80		0.343	1115	3.04727		0.34	45	1.65321
Tb927.7.570	0.422		2240		166		0.34	1115	3.04727		0.364	45	1.65321
Tb927.1.730	0.32		569		8		0.381	1115	3.04727		0.403	45	1.65321
Tb927.11.9860	0.482		6146		2038		0.34	1114	3.04689		0.351	45	1.65321
Tb927.3.4970	0.357		1685		65		0.362	1114	3.04689		0.383	45	1.65321
Tb927.8.5820	0.358		607		24		0.345	1113	3.0465		0.36	45	1.65321
Tb927.9.4930	0.32		391		7		0.329	1113	3.0465		0.366	45	1.65321
Tb927.9.8760	0.343		1605		8		0.33	1113	3.0465		0.344	45	1.65321
Tb927.11.1980	0.388		13840		405		0.381	1111	3.04571		0.327	44	1.64345
Tb927.11.6070	0.349		1078		66		0.363	1110	3.04532		0.371	44	1.64345
Tb927.8.5710	0.353		938		41		0.361	1110	3.04532		0.394	44	1.64345
Tb927.9.13100	0.379		675		42		0.367	1109	3.04493		0.355	44	1.64345
Tb927.11.14890	0.361		585		8		0.428	1109	3.04493		0.301	44	1.64345
Tb927.7.620	0.33		463		11		0.382	1109	3.04493		0.355	44	1.64345
Tb927.10.4600	0.351		820		29		0.372	1109	3.04493		0.353	44	1.64345
Tb927.2.3480	0.372		1109		33		0.405	1109	3.04493		0.365	44	1.64345
Tb927.3.1920	0.401		2535		117		0.384	1107	3.04415		0.414	44	1.64345
Tb927.5.2460	0.338		608		28		0.336	1107	3.04415		0.326	44	1.64345
Tb927.7.3410	0.415		4851		320		0.361	1107	3.04415		0.32	44	1.64345
Tb927.10.8370	0.352		209		12		0.357	1107	3.04415		0.347	44	1.64345
Tb927.11.3340	0.341		1116		69		0.363	1106	3.04376		0.348	44	1.64345
Tb927.11.8370	0.364		1322		26		0.352	1106	3.04376		0.342	44	1.64345
Tb927.2.6100	0.375		1619		61		0.357	1106	3.04376		0.313	44	1.64345
Tb927.3.2270	0.317		629		14		0.373	1105	3.04336		0.371	44	1.64345
Tb927.5.950	0.33		2251		116		0.36	1105	3.04336		0.358	44	1.64345
Tb927.6.1090	0.367		2844		136		0.355	1105	3.04336		0.344	44	1.64345
Tb927.7.6700	0.307		616		100		0.328	1105	3.04336		0.364	44	1.64345
Tb927.11.4200	0.413		3745		183		0.346	1104	3.04297		0.312	44	1.64345
Tb927.8.4390	0.369		1839		53		0.333	1104	3.04297		0.314	44	1.64345
Tb927.9.13040	0.379		294		12		0.39	1103	3.04258		0.342	44	1.64345
Tb927.10.10330	0.352		752		36		0.341	1103	3.04258		0.35	44	1.64345
Tb927.10.4290	0.386		646		68		0.418	1103	3.04258		0.382	44	1.64345
Tb927.10.7380	0.352		1274		52		0.366	1102	3.04218		0.359	44	1.64345
Tb927.11.5980	0.339		160		6		0.383	1102	3.04218		0.337	44	1.64345
Tb927.5.4140	0.299		759		10		0.376	1101	3.04179		0.35	44	1.64345
Tb927.6.2370	0.322		933		27		0.383	1101	3.04179		0.351	44	1.64345
Tb927.9.10690	0.39		1288		35		0.375	1100	3.04139		0.34	44	1.64345
Tb927.9.4350	0.355		1627		33		0.342	1100	3.04139		0.344	44	1.64345
Tb927.3.2130	0.322		698		13		0.362	1099	3.041		0.333	44	1.64345
Tb927.10.3580	0.376		802		33		0.379	1099	3.041		0.375	44	1.64345
Tb927.10.7620	0.38		2215		63		0.346	1099	3.041		0.364	44	1.64345
Tb927.4.1730	0.423		474		32		0.36	1098	3.0406		0.395	44	1.64345
Tb927.7.580	0.36		1473		33		0.325	1098	3.0406		0.352	44	1.64345
Tb927.8.3960	0.375		820		17		0.367	1097	3.04021		0.38	44	1.64345
Tb927.1.1130	0.323		864		8		0.371	1095	3.03941		0.329	44	1.64345
Tb927.11.5990	0.327		524		13		0.37	1094	3.03902		0.361	44	1.64345
Tb927.3.1290	0.341		2039		33		0.337	1094	3.03902		0.414	44	1.64345
Tb927.4.770	0.318		2668		42		0.353	1094	3.03902		0.342	44	1.64345
Tb927.5.2810	0.399		759		40		0.378	1092	3.03822		0.365	44	1.64345
Tb927.8.2990	0.298		124		5		0.336	1092	3.03822		0.363	44	1.64345
Tb927.10.10300	0.317		481		12		0.334	1091	3.03782		0.408	43	1.63347
Tb927.5.1620	0.359		785		64		0.34	1091	3.03782		0.407	43	1.63347
Tb927.7.6610	0.322		2242		34		0.379	1090	3.03743		0.369	43	1.63347
Tb927.10.4010	0.333		2085		36		0.358	1089	3.03703		0.354	43	1.63347
Tb927.4.2500	0.366		990		42		0.355	1089	3.03703		0.373	43	1.63347
Tb927.6.3690	0.336		1084		47		0.347	1089	3.03703		0.365	43	1.63347
Tb927.10.10650	0.359		971		26		0.344	1088	3.03663		0.387	43	1.63347
Tb927.10.13980	0.387		887		48		0.342	1088	3.03663		0.356	43	1.63347
Tb927.11.2370	0.357		2517		68		0.333	1088	3.03663		0.351	43	1.63347
Tb927.11.6000	0.414		870		35		0.356	1087	3.03623		0.361	43	1.63347
Tb927.6.3970	0.337		310		12		0.362	1087	3.03623		0.354	43	1.63347
Tb927.9.10490	0.402		912		29		0.322	1087	3.03623		0.354	43	1.63347
Tb927.1.2580	0.351		1614		36		0.341	1087	3.03623		0.319	43	1.63347
Tb927.10.11980	0.358		266		19		0.349	1086	3.03583		0.348	43	1.63347
Tb927.10.14380	0.332		2521		37		0.351	1085	3.03543		0.343	43	1.63347
Tb927.10.3890	0.344		586		13		0.353	1084	3.03503		0.392	43	1.63347
Tb927.8.6840	0.329		796		10		0.324	1084	3.03503		0.359	43	1.63347
Tb927.10.10850	0.381		6505		92		0.385	1084	3.03503		0.368	43	1.63347
Tb927.10.290	0.367		5412		263		0.336	1084	3.03503		0.368	43	1.63347
Tb927.10.900	0.34		460		25		0.353	1083	3.03463		0.351	43	1.63347
Tb927.11.14660	0.363		389		27		0.345	1083	3.03463		0.358	43	1.63347
Tb927.11.3840	0.38		997		32		0.346	1083	3.03463		0.326	43	1.63347
Tb927.7.1620	0.343		655		26		0.364	1082	3.03423		0.382	43	1.63347
Tb927.7.7260	0.387		662		17		0.35	1082	3.03423		0.376	43	1.63347
Tb927.9.4390	0.376		1614		45		0.382	1081	3.03383		0.4	43	1.63347
Tb927.1.4780	0.331		607		12		0.403	1080	3.03342		0.333	43	1.63347
Tb927.11.10760	0.397		5471		110		0.389	1080	3.03342		0.372	43	1.63347
Tb927.6.4830	0.317		409		11		0.404	1079	3.03302		0.368	43	1.63347
Tb927.7.4610	0.364		417		20		0.349	1078	3.03262		0.353	43	1.63347
Tb927.7.4660	0.351		425		15		0.327	1077	3.03222		0.313	43	1.63347
Tb927.9.11370	0.328		1145		96		0.341	1077	3.03222		0.332	43	1.63347
Tb927.9.6430	0.347		1547		23		0.333	1077	3.03222		0.344	43	1.63347
Tb927.10.11510	0.371		374		32		0.356	1076	3.03181		0.391	43	1.63347
Tb927.11.15620	0.303		102		1		0.343	1074	3.031		0.391	43	1.63347
Tb927.11.850	0.34		889		59		0.368	1074	3.031		0.328	43	1.63347
Tb927.2.2590	0.342		715		64		0.371	1074	3.031		0.343	43	1.63347
Tb927.8.1800	0.323		538		9		0.362	1074	3.031		0.332	43	1.63347
Tb927.10.10700	0.346		957		25		0.342	1074	3.031		0.368	43	1.63347
Tb927.11.15990	0.324		3145		46		0.332	1073	3.0306		0.334	43	1.63347
Tb927.11.5460	0.37		369		45		0.338	1072	3.03019		0.36	43	1.63347
Tb927.7.3270	0.361		1011		9		0.384	1072	3.03019		0.375	43	1.63347
Tb927.7.5030	0.312		1019		38		0.36	1071	3.02979		0.362	43	1.63347
Tb927.11.11860	0.341		494		28		0.364	1071	3.02979		0.349	43	1.63347
Tb927.3.640	0.354		1996		93		0.367	1069	3.02898		0.334	43	1.63347
Tb927.7.3750	0.369		2489		82		0.352	1069	3.02898		0.385	43	1.63347
Tb927.9.7820	0.339		726		26		0.365	1068	3.02857		0.36	43	1.63347
Tb927.11.10090	0.374		2155		100		0.36	1067	3.02816		0.325	43	1.63347
Tb927.11.3490	0.365		5156		153		0.332	1067	3.02816		0.341	43	1.63347
Tb927.3.3300	0.364		4170		182		0.357	1067	3.02816		0.346	43	1.63347
Tb927.3.4130	0.413		2477		55		0.318	1067	3.02816		0.353	43	1.63347
Tb927.4.2440	0.392		617		22		0.311	1066	3.02776		0.331	43	1.63347
Tb927.9.9020	0.401		1059		37		0.388	1065	3.02735		0.343	43	1.63347
Tb927.1.1960	0.394		2130		32		0.353	1065	3.02735		0.368	42	1.62325
Tb927.10.13230	0.338		574		25		0.345	1063	3.02653		0.343	42	1.62325
Tb927.3.4710	0.347		772		72		0.369	1063	3.02653		0.328	42	1.62325
Tb927.5.3290	0.373		744		19		0.36	1062	3.02612		0.356	42	1.62325
Tb927.6.4330	0.296		461		38		0.339	1061	3.02572		0.428	42	1.62325
Tb927.6.620	0.371		2950		33		0.362	1061	3.02572		0.376	42	1.62325
Tb927.8.2090	0.3		547		36		0.33	1061	3.02572		0.374	42	1.62325
Tb927.9.3370	0.419		556		80		0.39	1061	3.02572		0.338	42	1.62325
Tb927.9.3390	0.385		798		64		0.332	1061	3.02572		0.323	42	1.62325
Tb927.11.9960	0.343		669		33		0.323	1060	3.02531		0.368	42	1.62325
Tb927.3.3620	0.406		333		59		0.318	1059	3.0249		0.362	42	1.62325
Tb927.4.1950	0.354		1454		31		0.401	1059	3.0249		0.397	42	1.62325
Tb927.8.6610	0.345		282		18		0.38	1059	3.0249		0.289	42	1.62325
Tb927.10.13440	0.351		378		22		0.339	1059	3.0249		0.379	42	1.62325
Tb927.10.1490	0.387		6445		149		0.376	1059	3.0249		0.318	42	1.62325
Tb927.10.5070	0.371		1074		35		0.363	1058	3.02449		0.366	42	1.62325
Tb927.8.2760	0.359		656		11		0.32	1057	3.02407		0.342	42	1.62325
Tb927.9.4250	0.372		1126		103		0.348	1057	3.02407		0.319	42	1.62325
Tb927.10.2380	0.375		2316		74		0.322	1057	3.02407		0.363	42	1.62325
Tb927.11.4270	0.35		303		11		0.366	1057	3.02407		0.335	42	1.62325
Tb927.5.1900	0.387		2237		134		0.341	1057	3.02407		0.348	42	1.62325
Tb927.7.550	0.347		1679		55		0.35	1056	3.02366		0.321	42	1.62325
Tb927.8.1090	0.338		1293		45		0.341	1055	3.02325		0.344	42	1.62325
Tb927.8.2040	0.338		412		23		0.343	1054	3.02284		0.34	42	1.62325
Tb927.10.12640	0.347		352		23		0.369	1054	3.02284		0.357	42	1.62325
Tb927.11.14490	0.342		1009		73		0.332	1053	3.02243		0.365	42	1.62325
Tb927.11.3550	0.4		707		51		0.371	1052	3.02202		0.34	42	1.62325
Tb927.11.5000	0.371		3130		168		0.34	1052	3.02202		0.368	42	1.62325
Tb927.11.9390	0.36		375		11		0.334	1052	3.02202		0.357	42	1.62325
Tb927.8.3020	0.363		1310		55		0.322	1051	3.0216		0.406	42	1.62325
Tb927.9.11660	0.407		1713		143		0.383	1050	3.02119		0.355	42	1.62325
Tb927.9.6510	0.366		2155		24		0.395	1050	3.02119		0.367	42	1.62325
Tb927.10.14770	0.381		2164		95		0.35	1050	3.02119		0.325	42	1.62325
Tb927.10.5830	0.35		1465		44		0.362	1049	3.02078		0.369	42	1.62325
Tb927.11.12370	0.373		764		11		0.363	1048	3.02036		0.333	42	1.62325
Tb927.4.3430	0.4		718		117		0.395	1047	3.01995		0.354	42	1.62325
Tb927.5.1170	0.347		192		15		0.339	1047	3.01995		0.293	42	1.62325
Tb927.7.5850	0.364		940		27		0.353	1045	3.01912		0.383	42	1.62325
Tb927.8.3860	0.314		1037		29		0.34	1045	3.01912		0.336	42	1.62325
Tb927.10.7680	0.397		2380		61		0.368	1045	3.01912		0.341	42	1.62325
Tb927.10.8170	0.336		3024		41		0.37	1045	3.01912		0.375	42	1.62325
Tb927.11.15160	0.323		747		94		0.371	1044	3.0187		0.457	42	1.62325
Tb927.11.970	0.355		630		41		0.328	1043	3.01828		0.34	42	1.62325
Tb927.11.9790	0.399		758		118		0.348	1042	3.01787		0.371	42	1.62325
Tb927.5.1670	0.323		1324		56		0.367	1042	3.01787		0.333	42	1.62325
Tb927.8.5060	0.38		437		37		0.399	1042	3.01787		0.379	42	1.62325
Tb927.10.2720	0.382		567		24		0.357	1042	3.01787		0.34	42	1.62325
Tb927.10.2940	0.368		632		66		0.355	1042	3.01787		0.371	41	1.61278
Tb927.11.16750	0.388		2197		105		0.422	1041	3.01745		0.322	41	1.61278
Tb927.2.2410	0.319		636		13		0.347	1041	3.01745		0.319	41	1.61278
Tb927.2.3920	0.311		1066		56		0.333	1041	3.01745		0.386	41	1.61278
Tb927.3.3160	0.33		464		9		0.363	1041	3.01745		0.375	41	1.61278
Tb927.7.6950	0.373		590		29		0.397	1040	3.01703		0.381	41	1.61278
Tb927.9.13970	0.357		1123		53		0.342	1040	3.01703		0.338	41	1.61278
Tb927.9.5170	0.345		1170		28		0.345	1040	3.01703		0.377	41	1.61278
Tb927.10.11820	0.379		863		28		0.348	1039	3.01662		0.335	41	1.61278
Tb927.4.1340	0.388		2202		40		0.334	1039	3.01662		0.324	41	1.61278
Tb927.5.3380	0.375		629				0.398	1039	3.01662		0.429	41	1.61278
Tb927.6.2560	0.346		1513		78		0.333	1037	3.01578		0.439	41	1.61278
Tb927.10.13240	0.347		987		30		0.314	1037	3.01578		0.346	41	1.61278
Tb927.10.14610	0.345		915		45		0.351	1037	3.01578		0.352	41	1.61278
Tb927.11.2720	0.351		474		11		0.344	1036	3.01536		0.341	41	1.61278
Tb927.11.4220	0.313		382		11		0.362	1036	3.01536		0.364	41	1.61278
Tb927.4.3720	0.329		548		34		0.374	1036	3.01536		0.319	41	1.61278
Tb927.10.13350	0.331		443		8		0.355	1036	3.01536		0.384	41	1.61278
Tb927.2.5120	0.329		1246		54		0.34	1036	3.01536		0.351	41	1.61278
Tb927.10.10600	0.423		12		19		0.394	1035	3.01494		0.363	41	1.61278
Tb927.10.14240	0.388		5212		113		0.331	1035	3.01494		0.333	41	1.61278
Tb927.10.8120	0.332		513		9		0.371	1035	3.01494		0.353	41	1.61278
Tb927.11.13230	0.398		2483		322		0.362	1035	3.01494		0.336	41	1.61278
Tb927.11.3660	0.379		927		166		0.351	1034	3.01452		0.355	41	1.61278
Tb927.5.2270	0.33		1189		55		0.349	1033	3.0141		0.342	41	1.61278
Tb927.5.4150	0.368		2698		101		0.339	1033	3.0141		0.423	41	1.61278
Tb927.6.1610	0.374		1036		27		0.386	1033	3.0141		0.353	41	1.61278
Tb927.7.5590	0.338		1348		7		0.415	1032	3.01368		0.346	41	1.61278
Tb927.11.10050	0.463		889		89		0.38	1029	3.01242		0.376	41	1.61278
Tb927.11.6170	0.377		7956		87		0.355	1029	3.01242		0.337	41	1.61278
Tb927.8.5280	0.384		1174		63		0.338	1028	3.01199		0.334	41	1.61278
Tb927.1.1030	0.362		1049		22		0.36	1028	3.01199		0.418	41	1.61278
Tb927.10.9980	0.35		316		29		0.366	1028	3.01199		0.316	41	1.61278
Tb927.3.3120	0.348		966		60		0.377	1028	3.01199		0.335	41	1.61278
Tb927.7.3980	0.358		8224		129		0.346	1027	3.01157		0.369	41	1.61278
Tb927.7.4000	0.361		2705		54		0.351	1027	3.01157		0.377	41	1.61278
Tb927.9.11850	0.368		2474		31		0.337	1027	3.01157		0.343	41	1.61278
Tb927.10.10400	0.398		1283		51		0.374	1026	3.01115		0.312	41	1.61278
Tb927.11.1770	0.375		650		31		0.322	1026	3.01115		0.314	41	1.61278
Tb927.11.3770	0.369		2092		166		0.346	1026	3.01115		0.357	41	1.61278
Tb927.6.3160	0.357		1023		37		0.348	1026	3.01115		0.36	41	1.61278
Tb927.8.5680	0.326		586		16		0.354	1026	3.01115		0.366	41	1.61278
Tb927.10.14720	0.353		1745		80		0.348	1026	3.01115		0.345	41	1.61278
Tb927.10.8140	0.363		284		31		0.344	1026	3.01115		0.336	41	1.61278
Tb927.11.1590	0.327		455		27		0.352	1025	3.01072		0.348	41	1.61278
Tb927.11.8400	0.316		62		1		0.383	1025	3.01072		0.347	41	1.61278
Tb927.8.2350	0.365		468		24		0.334	1025	3.01072		0.342	41	1.61278
Tb927.8.3810	0.336		697		50		0.379	1024	3.0103		0.335	41	1.61278
Tb927.1.3150	0.367		334		30		0.312	1024	3.0103		0.39	41	1.61278
Tb927.10.5890	0.345		565		20		0.385	1024	3.0103		0.351	40	1.60206
Tb927.10.5790	0.366		1309		48		0.369	1023	3.00988		0.371	40	1.60206
Tb927.10.7210	0.315		611		29		0.357	1023	3.00988		0.377	40	1.60206
Tb927.11.15350	0.384		997		45		0.391	1022	3.00945		0.35	40	1.60206
Tb927.10.5910	0.324		901		17		0.374	1022	3.00945		0.324	40	1.60206
Tb927.11.14800	0.361		521		15		0.351	1021	3.00903		0.349	40	1.60206
Tb927.3.5020	0.356		3321		87		0.37	1020	3.0086		0.337	40	1.60206
Tb927.5.2730	0.383		289		26		0.333	1020	3.0086		0.391	40	1.60206
Tb927.7.2690	0.367		555		55		0.37	1020	3.0086		0.331	40	1.60206
Tb927.7.870	0.335		756		19		0.329	1020	3.0086		0.36	40	1.60206
Tb927.10.11480	0.368		174		5		0.312	1019	3.00817		0.286	40	1.60206
Tb927.10.3990	0.415		15943		872		0.352	1019	3.00817		0.358	40	1.60206
Tb927.8.6240	0.434		7196		769		0.354	1019	3.00817		0.37	40	1.60206
Tb927.9.8700	0.329		449		28		0.348	1018	3.00775		0.38	40	1.60206
Tb927.3.3140	0.358		1599		77		0.348	1018	3.00775		0.409	40	1.60206
Tb927.3.5360	0.354		506		28		0.373	1018	3.00775		0.416	40	1.60206
Tb927.4.1680	0.363		1712		102		0.334	1017	3.00732		0.395	40	1.60206
Tb927.6.1070	0.335		652		15		0.319	1017	3.00732		0.399	40	1.60206
Tb927.11.13970	0.371		1158		66		0.376	1017	3.00732		0.388	40	1.60206
Tb927.3.2790	0.341		710		7		0.341	1017	3.00732		0.36	40	1.60206
Tb927.6.4420	0.334		941		17		0.435	1015	3.00647		0.366	40	1.60206
Tb927.8.5750	0.347		600		11		0.335	1014	3.00604		0.345	40	1.60206
Tb927.9.1410	0.329		637		31		0.367	1014	3.00604		0.342	40	1.60206
Tb927.11.16410	0.342		954		41		0.332	1014	3.00604		0.304	40	1.60206
Tb927.6.3840	0.395		7892		1563		0.369	1014	3.00604		0.341	40	1.60206
Tb927.10.6810	0.367		824		20		0.363	1013	3.00561		0.358	40	1.60206
Tb927.11.16040	0.39		473		21		0.334	1013	3.00561		0.333	40	1.60206
Tb927.4.1040	0.399		353		58		0.334	1013	3.00561		0.345	40	1.60206
Tb927.6.2710	0.354		1305		30		0.374	1012	3.00518		0.414	40	1.60206
[truncated: 3,140 more rows]
