# Supplementary material for: Codon choice directs constitutive mRNA levels in trypanosomes
Source: eLife. 2018 Mar 15;7:e32467. doi: 10.7554/eLife.32467 (PMC5896880; doi:10.7554/eLife.32467)
Supplement: Supplementary file 11. [file elife-32467-supp11.xlsx]

## Sheet: Plasmids
GFP	GFP Source	5' Feature	Plasmid used for expression
eGFP	Clontech	No	p4432
GFP 71	Kudla et al., 2009	No	p4433
GFP 183	Kudla et al., 2009	No	p4434
GFP 188	Kudla et al., 2009	No	p4435
GFP 194	Kudla et al., 2009	No	p4436
GFP 226	Kudla et al., 2009	No	p4437
GFP 102	Kudla et al., 2009	No	p4439
GFP S1	This work	No	p4444
GFP S2	This work	No	p4445
GFP S3	This work	No	p4446
GFP S4	This work	No	p4447
GFP S5	This work	No	p4448
GFP P1	This work	No	p4505
GFP P2	This work	No	p4531
GFP P3	This work	No	p4532
GFP 163	Kudla et al., 2009	No	p4533
GFP 205	Kudla et al., 2009	No	p4534
GFP 211	Kudla et al., 2009	No	p4535
GFP 224	Kudla et al., 2009	No	p4536
GFP 065	This work	No	p4725
GFP 075	This work	No	p4726
GFP 095	This work	No	p4727
eGFP	Clontech	Single cut EcoRV site	p4699
eGFP	Clontech	Hairpin 23bp	p4724
GFP 102	Kudla et al., 2009	Hairpin 23bp	p4769
GFP 226	Kudla et al., 2009	Hairpin 23bp	p4770
GFP P2	This work	Hairpin 23bp	p4771
GFP 065	This work	Hairpin 23bp	p4772
eGFP	Clontech	Hairpin 18bp	p4841
eGFP	Clontech	Hairpin 12bp	p4842

## Sheet: Oligonucleotides
Name	5’-3’ Sequence	Description
D410	AAGCTTCAACAATGGTGAGCAAGGGCGA	Forward primer for amplification of eGFP - HindIII
D413	AAGCTTCAACAATGGTGAGTAAGGGTGA	Forward primer for amplification of GFP 71 - HindIII
D414	AAGCTTCAACAATGGTCAGTAAGGGGGA	Forward primer for amplification of GFP 102 - HindIII
D415	AAGCTTCAACAATGGTCAGTAAAGGCGA	Forward primer for amplification of GFP 183 and 188 - HindIII
D416	AAGCTTCAACAATGGTGAGCAAGGGGGA	Forward primer for amplification of GFP 194 - HindIII
D417	AAGCTTCAACAATGGTGAGCAAAGGTGA	Forward primer for amplification of GFP 226 - HindIII
D418	GGATCCTTACTTGTACAGCTCGTC	Reverse primer for amplification of eGFP - BamHI
D419	GGATCCTTATTTATAAAGTTCGTC	Reverse primer for amplification of GFP 71 and 226 - BamHI
D420	GGATCC TTATTTATATAGTTCATC	Reverse primer for amplification of GFP 102 - BamHI
D421	GGATCCTTATTTGTACAGTTCGTC	Reverse primer for amplification of GFP 183 and 188 - BamHI
D422	GGATCCTTATTTGTAAAGTTCGTC	Reverse primer for amplification of GFP 194 - BamHI
D429	AAGCTTCAACAATGGTCTCGAAAGGGGAAGAAC	Forward primer for amplification of GFP S1 - HindIII
D431	GGATCCTTATTTATATAGTTCGTCCATC	Reverse primer for amplification of GFP S1 - BamHI
D630	AAGCTTCAACAATGGTGAGCAAGGGGGA	Forward primer for amplification of GFP 163 - HindIII
D631	AAGCTTCAACAATGGTGAGCAAAGGTGA	Forward primer for amplification of GFPs 205, 211 and 224 - HindIII
D632	GGATCCTTATTTGTACAGTT	Reverse primer for amplification of GFPs 163, 205 and 224 - BamHI
D633	GGATCCTTATTTATAAAGCTCA	Reverse primer for amplification of GFP 211 - BamHI
D797	ATATCCGGCGGCGGCGGCGGCGGAATTCCGCCGCCGCCGCCGCCGCCC	Forward primer for addition of hairpin 23bp in EcoRV site of 4699
D798	ATATGGGCGGCGGCGGCGGCGGCGGAATTCCGCCGCCGCCGCCGCCGG	Reverse primer for addition of hairpin 23bp in EcoRV site of 4699
D799	GATCTTCAAACACTAGTTTAAGCAAAGGACTATTCATCCGATATCATATTAGCAACAGTAGGTACTAGCA	Forward primer for insertion of EcoRV site in p4432
D800	CCACTAACAACAACAACAAAGCACTTCTATTTATTTATCGAATTCATAA	Forward primer for insertion of EcoRV site in p4432
D801	TGCTAATATGATATCGGATGAATAGTCCTTTGCTTAAACTAGTGTTTGAA	Reverse primer for insertion of EcoRV site in p4432
D802	AGCTTTATGAATTCGATAAATAAATAGAAGTGCTTTGTTGTTGTTGTTAGTGGTGCTAGTACCTACTGT	Reverse primer for insertion of EcoRV site in p4432
D845	GAATTCATAAAGCTTCAACAATG	Forward primer for amplification of GFP sequences in 4432 for Northern blotting probes
D846	ACACAACCCGGTGGGATCCTTA	Reverse primer for amplification of GFP sequences in 4432 for Northern blotting probes
D865	CAGCGGATCACGCGCTTACACT	Forward primer for amplification of 18S rRNA for Northern blotting probe
D866	CTGTGCAATTATACATGCACAT	Reverse primer for amplification of 18S rRNA for Northern blotting probe
E417	ATATCCGGCGGCGGCGGAATTCCGCCGCCGCCGCCC	Forward oligo for insertion of Hairpin 18bp in EcoRV site of 4699
E418	ATATGGGCGGCGGCGGCGGAATTCCGCCGCCGCCGG	Reverse oligo for insertion of Hairpin 18bp in EcoRV site of 4699
E419	ATATCCGGCGGCGGAATTCCGCCGCCGCCC	Forward oligo for insertion of Hairpin 12bp in EcoRV site of 4699
E420	ATATGGGCGGCGGCGGAATTCCGCCGCCGG	Reverse oligo for insertion of Hairpin 12bp in EcoRV site of 4699
